1 **Targeted high-resolution chromosome conformation capture at**  
2 **genome-wide scale.**

3  
4 Damien J. Downes<sup>1</sup>, Matthew E. Gosden<sup>1</sup>, Jelena Telenius<sup>2</sup>, Stephanie J. Carpenter<sup>1</sup>, Lea  
5 Nussbaum<sup>1</sup>, Sara De Ornellas<sup>1,3</sup>, Martin Sergeant<sup>2</sup>, Chris Q. Eijsbouts<sup>4,5</sup>, Ron  
6 Schwessinger<sup>1,2</sup>, Jon Kerry<sup>2</sup>, Nigel Roberts<sup>1</sup>, Arun Shivalingam<sup>3</sup>, Afaf El-Sagheer<sup>3</sup>, A. Marieke  
7 Oudelaar<sup>1,2</sup>, Tom Brown<sup>3</sup>, Veronica J. Buckle<sup>1</sup>, James O.J. Davies<sup>1</sup>, & Jim R. Hughes<sup>1,2</sup>.

8  
9 **Affiliations:**

- 10 1. MRC Molecular Haematology Unit, MRC Weatherall Institute of Molecular Medicine,  
11 University of Oxford, Oxford, UK  
12 2. MRC WIMM Centre for Computational Biology, MRC Weatherall Institute of  
13 Molecular Medicine, University of Oxford, Oxford, UK  
14 3. Chemistry Research Laboratory, Department of Chemistry, University of Oxford,  
15 Oxford, UK  
16 4. Big Data Institute, Li Ka Shing Centre for Health Information and Discovery,  
17 University of Oxford, Oxford, UK  
18 5. Wellcome Centre for Human Genetics, Nuffield Department of Medicine, University  
19 of Oxford, Oxford, UK

20  
21  
22 **Key Words:**

23 Gene regulation, chromosome conformation capture, 3C, genome structure

24 **ABSTRACT**

25 Chromosome conformation capture (3C) provides an adaptable tool for studying diverse  
26 biological questions. Current 3C methods provide either low-resolution interaction profiles  
27 across the entire genome, or high-resolution interaction profiles at up to several hundred loci.  
28 All 3C methods are affected to varying degrees by inefficiency, bias and noise. As such,  
29 generation of reproducible high-resolution interaction profiles has not been achieved at scale.  
30 To overcome this barrier, we systematically tested and improved upon current methods. We  
31 show that isolation of 3C libraries from intact nuclei, as well as shortening and titration of  
32 enrichment oligonucleotides used in high-resolution methods reduces noise and increases on-  
33 target sequencing. We combined these technical modifications into a new method Nuclear-  
34 Titrated (NuTi) Capture-C, which provides a >3-fold increase in informative sequencing  
35 content over current Capture-C protocols. Using NuTi Capture-C we target 8,061 promoters  
36 in triplicate, demonstrating that this method generates reproducible high-resolution genome-  
37 wide 3C interaction profiles at scale.

## 38 **Introduction**

39 Chromosome conformation capture (3C) has emerged as the leading tool for studying the  
40 DNA folding associated with gene regulation and genome organization<sup>1,2</sup>. 3C methods  
41 measure the proximity of DNA elements through restriction enzyme digestion and ligation;  
42 sequencing of the resultant chimeric fragments produces a population-based interaction  
43 frequency as the output. The resolution achieved by 3C comes from the choice of restriction  
44 enzyme, the depth of sequencing, and whether or not targeted enrichment is performed.  
45 Currently, 3C methods can be categorized into two broad classes depending on their  
46 resolution.

47

48 Low-resolution 3C methods, such as Hi-C<sup>3</sup> and its derivatives, tend to use a 6-bp cutting  
49 enzyme to generate genome-wide interaction maps, with the standard experiment generating  
50 10-50 kb resolution<sup>2</sup>. Higher-quality profiles can be achieved through combinations of hugely  
51 increased sequencing, use of a 4-bp cutter, targeted enrichment (e.g. Capture Hi-C<sup>4</sup> [CHi-C],  
52 often called Promoter Capture Hi-C), and increased cell numbers. The prohibitive costs mean  
53 that such datasets rarely include sufficient number of replicates (triplicates) for statistical  
54 analysis and are not applicable to rare primary cell types due to the requirement for high cell  
55 numbers. Conversely, sub-kilobase resolution can be achieved by methods which enrich for  
56 target loci in 4-base cutter libraries; e.g. Capture-C<sup>5</sup>, 4C-seq<sup>6,7</sup>, and their derivatives. The  
57 current best high-resolution 3C method for sensitivity is NG Capture-C, with 10,000-100,000+  
58 unique interacting reporter reads per viewpoint<sup>2,8</sup>. NG Capture-C achieves its high resolution  
59 and sensitivity using biotinylated oligonucleotide pull down of target loci from 3C material,  
60 generated with a 4-bp cutter. The use of sequential enrichment, or “double capture”, results in  
61 30-50% on-target sequencing, an 160-fold increase over the initial Capture-C method<sup>5,8</sup>.

62

63 High-resolution 3C comes at the expense of the number of viewpoints that can be practically  
64 included in a single experiment. This is due to the roughly 16-fold increase in complexity when  
65 generating a 3C library with a 4-bp cutter compared to a restriction enzyme with a 6-bp motif.  
66 The need to robustly sample these much more complex libraries has so far limited NG  
67 Capture-C to hundreds of viewpoints, generally performed in triplicate for statistical analysis.  
68 However, a large increase in the specificity of enrichment and the minimalization of off-target  
69 and technical noise would practically translate into the feasibility of much larger viewpoint  
70 designs using high-resolution methods.

71

72 To dramatically increase the capacity of NG Capture-C, we have systematically optimized  
73 multiple aspects of the protocol. 3C libraries in general are prone to technically induced noise,  
74 which results in an increased frequency of non-informative *trans* reporters<sup>9</sup>. These spurious  
75 reporters represent experimental background and so do not informatively add to the  
76 interaction profiles, but do increase the required amount of sequencing. Consistent with  
77 previous work<sup>10</sup>, we show that the 3C libraries can be separated into nuclear and non-nuclear  
78 fractions with differing levels of information content. By optimising the 3C method to enrich for  
79 and isolate intact nuclei after ligation we show a 30% increase in informative content.

80

81 We next tested the effect of probe length and concentration on enrichment. Reducing  
82 oligonucleotide probes from 120 to 50 bp resulted in a 5% increase in reads containing *DpnII*  
83 sites. Additionally, titration of probe concentration resulted in a significant increase in capture  
84 specificity, and when combined with double capture resulted in up to 98% on-target capture;  
85 a 100-200% improvement over double capture alone. We have combined these optimisations,  
86 along with improvements to minimize losses during 3C DNA extraction and indexing<sup>9</sup> to  
87 generate a modified protocol: Nuclear-Titrated (NuTi) Capture-C.

88

89 The two seminal descriptions of targeted genome-wide 3C landscapes were carried out in  
90 human CD34<sup>+</sup> and GM12787 cells<sup>4</sup>, and in mouse embryonic stem cells (ESC) and fetal liver  
91 cultured erythroid cells<sup>11</sup> using CHi-C with the low-resolution *HindIII* 6-base cutter and  
92 targeting every gene through its longest annotated promoter. To demonstrate that NuTi  
93 Capture-C can be used to improve upon these efforts we first used RNA-seq, DNaseI-seq and  
94 ChIP-seq from mouse *ter119*<sup>+</sup> erythroid cells to identify 7,870 active promoters and 181  
95 inactive promoters for targeting. We performed NuTi Capture-C in triplicate from primary  
96 mouse erythroid cells, detecting over 1,000 unique ligation events for 93.6% of targets (6,732  
97 of 7,195 *DpnII* fragments). Using a Bayesian modelling approach to interaction calling<sup>12</sup> we  
98 were able to identify 472,270 promoter-interacting fragments across the genome, including  
99 12,316 finely mapped promoter/enhancer interactions. When compared to erythroid  
100 interactions found by CHi-C, NuTi Capture-C had a higher enrichment for active chromatin  
101 marks and greater specificity at identifying promoter-enhancer interactions. Therefore, with  
102 the application of NuTi Capture-C researchers will be able to map the regulatory landscapes  
103 of thousands of loci, *en masse* and at high-resolution.

104

105

106 **RESULTS**

107 ***Nuclear isolation reduces the frequency of spurious ligation.***

108 The quality of 3C libraries, as measured by changes in *cis*-to-*trans* ligation frequencies, can  
109 be drastically affected by technical noise<sup>9,10</sup>. Therefore, it is important to generate high-quality  
110 3C libraries which minimize this noise. Previous work has shown that a portion of nuclei remain  
111 intact during 3C digestion/ligation and intact nuclei contain the informative 3C DNA<sup>10</sup>. Most 3C  
112 methods are performed using the *in situ*<sup>13</sup> protocol which assumes a majority of ligation events  
113 occur within intact nuclei – rather than between DNA released from nuclei through either  
114 diffusion or nuclear rupture. Any DNA that does escape from nuclei can generate technical  
115 noise through inter-nuclear ligation, seen as higher “*trans*” interactions. To test the extent to  
116 which DNA is released from nuclei during digestion and ligation in *in situ* 3C libraries we used  
117 centrifugation to separate the post-ligation 3C library milieu into an insoluble nuclear fraction  
118 and a soluble DNA fraction (Fig. 1a). We found ~25% of DNA could be found in the un-pelleted  
119 supernatant using the standard *in situ* 3C method (Fig. 1b). NG Capture-C of both the standard  
120 *in situ* 3C milieu and partitioned fractions showed a higher *cis*-ligation frequency in nuclear  
121 material, and a higher *trans*-ligation frequency in the soluble fraction (Fig. 1c). A comparison  
122 of interactions at the *Hba-1/2*, *Hbb-b1/2* and *Slc25a37* loci showed maintenance of the general  
123 interaction profile between different fractions, however there was an increase in the proximal  
124 signal in the soluble fraction (Fig. 1d, Supp. Fig. 1) at the expense of informative long-range  
125 interactions.

126  
127 To measure the extent of spurious inter-nuclear ligation, we generated *in situ* 3C libraries from  
128 an admixture of human and mouse erythroid cells (Fig. 2a). By mixing samples during the 3C  
129 process half of inter-nuclear ligations are detectable as mouse-to-human ligations, or chimeric  
130 inter-species fragments. Detectable chimeric ligations represented 10-15% of reporter  
131 containing fragments (Fig. 2b). For each 3C library an equivalent number of fragments would  
132 contain inter-nuclear but undetectable mouse-mouse or human-human ligations; therefore 20-  
133 30% of all *in situ* 3C ligations were inter-nuclear artefacts which lack biological relevance. This  
134 is consistent with ~25% of *in situ* 3C DNA being found in the un-pelleted supernatant. This  
135 high rate of spurious ligation suggests data quality could be improved by maintenance nuclear  
136 integrity and isolation of intact nuclei after ligation – as opposed to before restriction  
137 endonuclease digestion. Analysis of these Nuclear 3C (Nu-3C) libraries showed that soluble  
138 3C material was reduced to 10% of all DNA (Fig. 1c), and only 4% of ligations were chimeric  
139 inter-nuclear events, which resulted in a significant increase in *cis* interactions (Fig. 2b).  
140 Therefore Nu-3C libraries represent a higher quality starting product for quantifying biologically  
141 relevant interactions.

142

143 ***Probe titration increases targeting efficiency.***

144 NG Capture-C was designed to capture target viewpoints with tens or hundreds of 120-bp  
145 biotinylated DNA oligonucleotides<sup>8</sup>; high enrichment is achieved through double capture. This  
146 method uses a commercial exome sequencing kit optimized to include several thousand  
147 oligonucleotides. To determine whether targeting efficiency is affected by oligonucleotide  
148 concentration we tested serial dilutions while targeting 11 loci in mouse erythroid cells and  
149 ESC. Lower probe concentrations resulted in reduced yields of DNA following single capture  
150 (Fig. 3a). Sequencing of captured material with each individual probe at a working  
151 concentration of 2.9 nM, produced 31.61% on-target sequencing (Stdev=2.00, n=4), similar to  
152 that of double capture without dilution<sup>8</sup>. When lower concentration probes were used in  
153 combination with double capture (Titrated Capture-C), 85-98% on-target sequencing was  
154 achieved; indicating the two optimizations are additive. When this combined method was  
155 applied to *Slc25a37* alone, a 97.70% on target sequencing was seen, equating to a 6.26-  
156 million-fold enrichment (see Methods). Increased on-target sequencing reduces the depth of  
157 sequencing required to generate the same number of informative reads. *We in silico* tested  
158 the number of raw reads required to generate high-quality profiles by down-sampling fastq  
159 files. When using probes targeting both ends of a viewpoint only 250,000 reads are required  
160 to exceed 30,000 unique interactions (Supp. Fig. 2). This depth of signal is 2.1 times better  
161 than the original NG Capture-C method<sup>8</sup>, and 11.6 times better than for an equivalent depth  
162 of sequencing for UMI-4C<sup>14</sup>.

163

164 A reduced read requirement represents a significant saving in the overall cost of Capture-C  
165 based experiments, which previously was a criticism of the method<sup>13</sup>. Another significant cost  
166 for NG Capture-C has been the 120-bp biotinylated oligonucleotides – though current pricing  
167 is significantly reduced. We performed capture with 50-bp oligonucleotides targeted to the  
168 well-characterized mouse globin and mitoferrin encoding genes. Shorter oligonucleotides  
169 generated reads with proportionally more *DpnII* restriction sites and significantly more  
170 informative reads per captured fragment (Fig. 3c,d). Consistent with these findings, analysis  
171 of the ends of captured *Slc25a37* fragments showed sonication breakpoints tended to be  
172 closer to the captured *DpnII* sites when using shorter oligonucleotides (Fig. 3e). This increase  
173 in informative capture events had no major changes to the local profiles of *Hba-1/2* and  
174 *Slc25a37*; with generally the same level of *cis* interactions and high reporter correlation  
175 between oligonucleotide lengths (Supp. Figs. 3,4). However, at *Hbb-b1/2* additional peaks of  
176 interaction were seen in both erythroid and ESC cells leading to reduced correlation between

177 oligonucleotide lengths (Supp. Fig. 5). Analysis of the sequences underlying these peaks  
178 showed a higher proportion of sequence identity for the 50-bp oligonucleotides. Given the  
179 increased similarity and that these peaks were fragment specific, they are likely artefacts  
180 arising from off-target capture. Therefore, while short probes provide more informative  
181 capture, they can also generate interaction artefacts through reduced specificity in highly  
182 duplicated loci.

183

#### 184 ***Enrichment generates significant bias at co-targeted fragments.***

185 Ligation frequency is the core readout of 3C techniques; many approaches use targeted  
186 enrichment through either oligonucleotide pull down (NG Capture-C<sup>8</sup>, Capture Hi-C<sup>4</sup>),  
187 immunoprecipitation (HiChIP<sup>15</sup>, ChIA-PET<sup>16</sup>, ChIA-Drop<sup>17</sup>) or RNA enrichment (HiChIRP<sup>18</sup>) to  
188 generate this readout. The introduction of bias in 3C experiments by enriching at multiple sites  
189 (i.e. “co-targeting”) is widely acknowledged<sup>5,13</sup>, but its magnitude has not been specifically  
190 reported. We first generated a mathematical model for enrichment-based bias (Supp. Note).  
191 Our model shows that bias will be variable from 1-to-20 fold, and affected by both the true  
192 interaction frequency of co-targeted fragments, and their relative enrichment efficiencies. To  
193 experimentally validate this model, we performed two captures at the well-characterized  
194 mouse *Hba-1/2* and *Hbb-b1/2* loci<sup>19,20</sup>. In the first capture four promoters and three enhancers  
195 were targeted; in the second capture an additional 54 evenly spaced targets were included<sup>21</sup>.  
196 The addition of the nearby oligonucleotides led to a significant difference in interaction counts  
197 at the co-targeted fragments (Fig. 5a). The bias was confined specifically to the co-targeted  
198 fragments, and its magnitude was consistent with modelling. Moreover the level of bias  
199 depended on both the underlying signal and the viewpoint (Fig. 5b,c, Supp. Fig. 6a) –  
200 indicating our model is a good first order approximation of co-targeting bias. This specific bias  
201 is also seen in CHi-C<sup>11</sup>, such as at *Hba-1* in mouse erythroid cells (Supp. Fig. 6b). As bias  
202 from oligonucleotide pull-down is limited to targeted fragments, large high-resolution designs  
203 with thousands of viewpoints are possible, provided the correct data analysis is used to  
204 exclude bias.

205

#### 206 ***Erythroid interaction maps for 8,061 promoters.***

207 Although NG Capture-C has been employed widely for reproducible high-resolution  
208 characterization of local chromatin interactions<sup>2,8</sup>, and CHi-C is used to generate low-  
209 resolution profiles at thousands of loci<sup>4,11</sup>, no method has yet been implemented to generate  
210 high-resolution 3C maps for thousands of loci in triplicate. By combining higher quality Nu-3C  
211 libraries, low-cell optimizations<sup>9,22</sup>, increased efficiency targeting through Titrated Capture-C,

212 and a reduction in PCR cycles, our new method, Nuclear-Titrated (NuTi) Capture-C (Supp.  
213 Fig. 7), could feasibly be applied to generate reproducible high-resolution data in both small  
214 and genome-scale experiments. To this end we used DNaseI-seq and ChIP-seq for H3K27ac,  
215 H3Kme1, H3Kme3 signals from mouse *ter119*<sup>+</sup> erythroid cells<sup>19,23</sup> to annotate tissue-specific  
216 transcription start sites of protein coding genes, identifying 7,870 active promoters for targeting  
217 (Supp. Fig. 8). We also included in the design a further 191 inactive control promoters, in total  
218 covering 7,195 *DpnII* fragments. Using this design, NuTi Capture-C was performed in triplicate  
219 for *ter119*<sup>+</sup> erythroid cells and sequenced to an average of 150-300k read-pairs per viewpoint  
220 (Fig. 5a). We identified 140.8M unique ligation events with over 1,000 unique *cis*-ligation  
221 events for 93.5% of targets (n=6,730; Fig. 5b). We first compared the profiles of the well-  
222 characterized *Hba-1/2*, *Hbb-b1/2*, *Slc25a37* loci between small- and genome-scale capture  
223 designs (Supp. Fig. 9), finding good correlation between experiments (Pearson  $r^2$ : 0.75-0.87).  
224 Interestingly, viewpoints shorter than 300 bp tended to have higher levels of *trans* interactions  
225 despite nuclear isolation (Supp. Fig. 10a,b). Analysis of non-nuclear DNA from *HindIII* and  
226 *DpnII* 3C digestion found higher amounts of DNA from the 4-bp cutter (Supp. Fig. 10c,d). This  
227 suggests short fragments may either evade crosslinking, or be freed as small, diffusible  
228 fragments by digestion – resulting in the observed differences in *cis*-to-*trans* frequencies.  
229 Therefore, a minimum fragment length could be considered during viewpoint selection.

230

231 To identify significant distal interactions for each promoter we employed Bayesian modelling  
232 with peaky<sup>12</sup> (Fig. 5a). Peaky identified 473,270 interacting fragment pairs (Marginal Posterior  
233 Probability of Contact [MPPC]  $\geq 0.01$ ) covering 75.8% of targeted viewpoints (n=5,451) and  
234 distributed between 2,500 bp and 1 Mb from the midpoint of the target. Identified fragments  
235 had strong enrichment for chromatin marks associated with active promoters and enhancers,  
236 with stronger enrichment seen for fragments with higher MPPC scores (Fig. 5c,d). To  
237 determine the identity of interacting regions we annotated 68,723 erythroid open-chromatin  
238 sites into eight classes using the GenoSTAN Hidden Markov Model<sup>24</sup> (Supp. Fig. 11a,b). By  
239 intersecting significantly interacting fragments with these annotations we found 22,767  
240 pairwise element interactions, accounted for by 56.7% (n=4,082) of targeted genes (Supp.  
241 Fig. 10c,d). When comparing the types of elements active promoters interact with, we found  
242 specific enrichment for both promoters and enhancers (Fig. 5d), with each gene interacting  
243 with an average of 2.8 promoters and 2.3 enhancers.

244

245 As NuTi Capture-C represents a technical advance in resolution over CHi-C, we directly  
246 compared our results with published CHi-C results in murine erythroid cells<sup>11</sup>. In general, the



247 high-resolution method produced more fine-grained interaction profiles for promoters,  
248 including for genes in adjacent regulatory domains (Fig. 6), and shared regulatory domains  
249 (Supp. Figs. 12-15), even when resolution is reduced with a 5 kb window. The smaller  
250 fragment size also meant fewer fragments were affected by co-targeting bias, which provided  
251 more informative profiles in gene dense regions and allowed targeting of alternate promoters  
252 (Supp. Figs. 12,15-17). The interaction calls identified using NuTi Capture-C also appear more  
253 specific to functional elements than the broad regulatory domain calls of CHi-C (Supp. Figs.  
254 12-28). We systematically compared our interaction calls with reported interaction calls. While  
255 we also found promoter-promoter interactions, consistent with the idea of promoter-hubs as  
256 reported by CHi-C<sup>11</sup>, we find many fewer constituent promoters (3.8 versus >20), likely due to  
257 the removal of co-targeting bias from NuTi Capture-C analysis. Next, where overlapping  
258 viewpoints were captured by the two methods, we found a higher level of active chromatin  
259 marks at interacting fragments identified with NuTi Capture-C (Supp. Fig. 29a). We also  
260 compared the types of annotated elements identified within interacting fragments. Given the  
261 high degree of co-capture bias observed with CHi-C, we focused on Promoter-Enhancer and  
262 Promoter-CTCF interactions. While both methods enriched for active enhancers, the extent of  
263 enrichment was greater in NuTi Capture-C (Supp. Fig. 29b). Therefore, NuTi Capture-C can  
264 be applied to produce unprecedented high-resolution 3C interaction maps at genome-wide  
265 scale.

266

## 267 **DISCUSSION**

268 Chromosome conformation capture is a powerful tool for the study of DNA folding within the  
269 nucleus. NG Capture-C has been applied to numerous biological questions, including  
270 enhancer characterization and super-enhancer dissection<sup>19,25-28</sup>, understanding the dynamics  
271 of Polycomb Bodies<sup>29,30</sup> and X-chromosome inactivation<sup>31,32</sup>, characterizing CTCF  
272 boundaries<sup>23,33</sup>, and mapping the effector genes for polygenic human traits<sup>34,35</sup>. Despite their  
273 widespread applicability, the sequencing needs and cost of high-resolution methods have  
274 limited their use in large-scale experiments. To this end we have substantially improved the  
275 scale upon which the NG Capture-C method can be employed. Our results show that efficiency  
276 gains can be made in both 3C library generation and in targeted enrichment. We have  
277 combined these technical improvements into a new method, NuTi Capture-C. Using NuTi  
278 Capture-C we generated high-resolution 3C interaction maps for over 8,000 genes in triplicate  
279 from erythroid cells. Demonstrating that with thoughtful optimisation of every stage of the  
280 process, high-resolution 3C methods can be taken to a genome-wide scale.

281

282 In optimising the production of 3C libraries, we found that the soluble and nuclear fractions of  
283 *in situ* 3C libraries have vastly different proximity signals and information content. Many  
284 statistical methods, including CHiCAGO<sup>36</sup>, peakC<sup>37</sup>, r3C-seq<sup>38</sup>, FourCSeq<sup>39</sup> and peaky<sup>12</sup>,  
285 model this proximity decay curve to identify significant interactions. Our finding that the decay  
286 curve can be altered by technical fluctuation will be of particular concern when using these  
287 methods, especially when comparing different cell-types, which may respond differently to  
288 fixation, lysis, digestion and ligation. Our solution to this was to isolate intact nuclei after  
289 ligation. This optimization also reduced the amount of noise from inter-nuclear ligation, the  
290 majority of which would be reported as *trans* interactions. This easy to implement protocol  
291 adaptation would therefore likely improve any 3C method, leading to more reliable interaction  
292 calling, particularly as *trans* gene regulation through interaction has recently emerged as  
293 important for control of olfactory receptor genes<sup>40</sup>.

294

295 We have also robustly tested the effect of probe length, concentration, and pool composition  
296 for 3C enrichment. Shortening the length of probes delivered a predictable yield in higher  
297 informative sequencing content and titrating the amount of probe increased the specificity of  
298 sequencing. In combination with nuclear isolation these modifications are easily implemented  
299 and will lead to immediate benefits, making possible very-large scale 3C capture designs. One  
300 consideration when targeting multiple viewpoints is: would the same result be returned by  
301 targeting each viewpoint independently, or does co-enrichment skew the underlying  
302 interaction frequencies? Through modelling and experimental approaches, we show that co-  
303 enrichment in 3C methodologies does introduce bias. Disconcertingly, we find that the bias  
304 introduced by co-targeting is affected by both the relative efficiency of viewpoint enrichment  
305 and their true interaction frequency. Controlling for this bias is essential to avoid misleading  
306 findings, such as the likely overinflated finding of >20 significant promoter-promoter  
307 interactions per targeted promoter<sup>11</sup>. For biotinylated oligonucleotide capture, used in Capture-  
308 C and Capture Hi-C, specific co-targeting sites are known, therefore bias can be avoided in  
309 these methods by simply masking interaction counts between co-targeted fragments. Bias  
310 introduced from methods where the target sites are not precisely defined, e.g.  
311 immunoprecipitation for ChIA-PET/HiChIP/ChIA-Drop<sup>15-17</sup> and RNA purification enrichment  
312 for HiChIRP<sup>18</sup>, is considerably more complex and at present no such correction for co-  
313 enrichment skew is used in these methods. Our findings indicate that to accurately adjust for  
314 bias in these methods, researchers must determine the underlying interaction frequency, and  
315 the efficiency of targeting at each site. Realistically this could only be done by performing

316 independent 3C (e.g. Hi-C) and enrichment (e.g. ChIP-seq) experiments prior to performing a  
317 now moot fusion experiment.

318

319 In this paper we have presented NuTi Capture-C, which provides an improved method for  
320 targeted high-resolution 3C experiments. The optimizations described here allow NuTi  
321 Capture-C to be applied at a genome-wide scale, but could also be implemented to improve  
322 the quality and reproducibility of other 3C techniques. Using this method, we expect  
323 researchers will be able to provide more reliable insights into biology while studying genome  
324 organization throughout growth and development.

## 325 MATERIALS AND METHODS

### 326 *Cell culture and fixation.*

327 Protocols were approved through the Oxford University Local Ethical Review process.  
328 Experimental procedures were performed in accordance with European Union Directive  
329 2010/63/EU and/or the UK Animals (Scientific Procedures) Act, 1986. Murine erythroid cells  
330 were obtained from spleens of C57BL/6 or C57BL/6-cross-CBA/J F1 hybrid mice treated with  
331 phenylhydrazine (40 mg g<sup>-1</sup> body weight per dose, with three doses given 12 h apart; mice  
332 were killed on day 5). Spleens, consisting of >80 % CD71<sup>+</sup> ter119<sup>+</sup> erythroid cells due to  
333 hemolytic anemia, were dissociated in Phosphate buffered solution (PBS) and strained  
334 through a 30  $\mu$ M filter (Miltenyi Biotec) to remove clumps. For ter119<sup>+</sup> selection, 3 $\times$ 10<sup>8</sup> cells  
335 were resuspended in 3 ml of FACS buffer (PBS with 10% FBS) and stained with 0.9  $\mu$ g anti-  
336 ter119-PE (130-102-338; Miltenyi Biotec). Stained cells were conjugated to anti-PE  
337 microbeads (130-048-801; Miltenyi Biotec) and passed through 3 LS Columns (Miltenyi  
338 Biotec). Mouse embryonic stem cells (ESC) from the feeder free line ES-E14TGA2a.IV (Strain  
339 129/Ola) were grown on 0.1% gelatin (BHK-21 Glasgow Minimal Essential Medium (MEM)  
340 [21710025; Invitrogen], 10% Fetal bovine serum (FBS) [10270106; Invitrogen], 2 mM  
341 glutamine [25030024; Invitrogen], 100 U ml<sup>-1</sup> Penicillin-Streptomycin [15140122; Invitrogen],  
342 1 mM sodium pyruvate [11360039; Invitrogen], 1  $\times$  MEM non-essential amino acids  
343 [11140035; Invitrogen], 0.1 mM 2-mercaptoethanol [31350010; Invitrogen], 1000 U ml<sup>-1</sup>  
344 Leukemia Inhibition Factor) and re-suspended with 0.05% trypsin for 5 minutes 37°C before  
345 washing with PBS. Human erythroid cells were generated from CD34<sup>+</sup> cells as described<sup>34,41</sup>  
346 with ethics approval (MREC 03/08/097) and stored according to HTA guidelines (License  
347 12433). Mouse erythroid and ESC were resuspended in RPMI (11875093; Invitrogen) with  
348 15% FBS for fixation. Human erythroid cells were fixed in growth media. For all cell types,  
349 cells were resuspended at 1-2 $\times$ 10<sup>6</sup> cells per ml and fixed at room temperature with 2% v/v  
350 formaldehyde for 10 minutes. Fixation was quenched with 120 mM glycine. Cells were washed  
351 with ice cold PBS before 3C library preparation.

352

### 353 *3C library preparation.*

354 *In situ* 3C libraries were prepared as previously described<sup>8</sup>. For Nu-3C, cells were lysed on  
355 ice in 5 ml lysis buffer (10 mM Tris-HCl, pH 8, 10 mM NaCl, 0.2% Igepal NP-40 (Sigma), 1 $\times$   
356 cComplete protease inhibitor (Roche) then pelleted by centrifugation (15 min, 4°C, 500 rcf).  
357 Lysis buffer was discarded and nuclei were resuspended in 1 ml PBS before snap freezing  
358 and storage at -20°C for up to 12 months. For digestion, up to 5 $\times$ 10<sup>6</sup> nuclei were defrosted,  
359 pelleted (15 min, 4°C, 500 rcf) then resuspended in 215  $\mu$ l 1 $\times$  *DpnII* buffer. Nuclei were then

360 permeabilized with 0.28% SDS in a single reaction (200  $\mu$ l nuclei, 60  $\mu$ l 10 $\times$  *DpnII* buffer, 434  
361 ml PCR grade water, 10  $\mu$ l 20% vol/vol SDS) and one undigested control (15  $\mu$ l nuclei, 28.5  
362  $\mu$ l 10 $\times$  *DpnII* buffer, 227.5 ml PCR grade water, 4  $\mu$ l 20% vol/vol SDS) for 1 hour at 37°C on a  
363 thermomixer (500 rpm). SDS was quenched into micelles for one hour by addition of 20%  
364 Triton-X (1.67% final concentration, 66  $\mu$ l for digest and 25  $\mu$ l for the undigested control). *DpnII*  
365 was added to digests in three aliquots of 10 $\mu$ l (500 U) spaced several hours apart for a total  
366 digest time of 16-24 hours at 37°C. *DpnII* was neutralized by incubation at 65°C for 15 minutes  
367 and then immediate transfer to ice to reduce potential for de-crosslinking. 100  $\mu$ l was removed  
368 from the digestion reaction and combined with 200  $\mu$ l PCR grade water as an un-ligated  
369 control. Controls were de-crosslinked, Proteinase-K treated, RNase A treated, and phenol  
370 chloroform extracted as described below. Crosslinked digested DNA was re-ligated by  
371 addition of 240 U T7 ligase (500 ml PCR grade water, 134 ml 10 $\times$  ligation buffer, 8  $\mu$ l ligase)  
372 and incubated overnight at 16°C on a thermomixer (500 rpm). Following ligation, nuclei were  
373 isolated by centrifugation (15 min, 4°C, 500 rcf) and the supernatant, containing both freed  
374 DNA and the high levels of DTT from the ligation buffer, discarded. Nuclei were resuspended  
375 in 300  $\mu$ l of TRIS-EDTA and de-crosslinked overnight at 65°C with 5  $\mu$ l Proteinase-K (3 U).  
376 RNA was removed by treatment with 5  $\mu$ l RNase A (7.5 mU) for 30 minutes at 37°C. DNA was  
377 extracted by addition of 310  $\mu$ l phenol-chloroform-isoamylalcohol with thorough vortexing  
378 before transfer to a phase lock tube and centrifugation (10 min, 12,600 rcf, room temp). The  
379 upper layer was transferred to a new tube and DNA precipitated overnight at -20°C (30  $\mu$ l 3M  
380 sodium acetate, 1  $\mu$ l glycoblue, 900  $\mu$ l 100% ethanol). DNA was pelleted by centrifugation (30  
381 min, 21,000 rcf, 4°C) and washed twice with 70% ice cold ethanol before resuspension in 150  
382  $\mu$ l water (30  $\mu$ l for controls). Samples and controls were quantified using Qubit (Invitrogen),  
383 run on a 1% agarose gel and tested by qPCR to determine library quality. Only libraries with  
384 a digestion efficiency >70% were used for Capture-C.

385

#### 386 *Library indexing.*

387 Libraries were either indexed with NEBNext DNA Library Prep Master Mix for Illumina (New  
388 England Biolabs) using 6  $\mu$ g input 3C DNA as previously described<sup>8</sup> or using NEBNext Ultra  
389 II DNA Library Prep Kit for Illumina (New England Biolabs). When using the Ultra II kit 3  $\mu$ g 3C  
390 material was sonicated to 200 bp as previously described<sup>8</sup>, and purified using Ampure XP  
391 SPRI beads (Beckman Coulter). DNA was eluted into 53  $\mu$ l with 1  $\mu$ l used for D1000  
392 TapeStation analysis (Agilent) and 2  $\mu$ l used for Qubit quantification (Invitrogen). 50  $\mu$ l of DNA  
393 ( $\leq$ 2  $\mu$ g) was then indexed with the following modifications; for the End Prep reaction, the 20°C  
394 incubation was lengthened to 45 min, 5  $\mu$ l of NEBNext Adaptor was added and incubated for

395 30 min at 20°C, the USER Enzyme incubation was extended to 30 min (37°C), and indexing  
396 was performed in two reactions with Herculase II Fusion Polymerase (Agilent) using 6 cycles  
397 of amplification as previously described<sup>8</sup>.

398

#### 399 *Oligonucleotide synthesis and capture.*

400 Pools of biotinylated oligonucleotides (Supp. Table 1) were sourced from IDT, Sigma or  
401 synthesized in house or had been previously reported<sup>8,21,34</sup>. We synthesized biotinylated  
402 oligonucleotides on a Combimatrix CustomArray B3 DNA synthesiser (B3Synth\_v25.1  
403 software) using CustomArray 12K Blank Slides (CustomArray Inc., PN: 2000100-Oligo pool  
404 Application) as described<sup>42</sup>. Oligonucleotide pull down for single and double capture of  
405 multiplexed 3C libraries was performed using the Nimblegen SeqCap EZ kit as previously  
406 described<sup>8</sup> with various masses of oligonucleotides with 10 cycles of DNA amplification.

407

#### 408 *Sequencing and Data analysis.*

409 Fastq reads for small design captures were generated using paired-end sequencing (75/75,  
410 and 150/150 cycles) on either a MiSeq or NextSeq Illumina platform. The active gene design  
411 was sequenced by Novogene (Hong Kong) using 75/75bp paired-end reads on the Illumina  
412 NovaSeq platform to generate at least 10<sup>5</sup> read pairs per viewpoint for each of the three  
413 libraries. Sequenced reads were processed using either CCseqBasic<sup>43</sup> or a modified script  
414 (CCseqBasicM) which improves throughput for thousands of oligonucleotides by parallelising  
415 analyses for groups of targets (available on Github: [https://github.com/Hughes-Genome-](https://github.com/Hughes-Genome-Group/CCseqBasicM)  
416 [Group/CCseqBasicM](https://github.com/Hughes-Genome-Group/CCseqBasicM)). Target enrichment was calculated as the percent of mapped read pairs  
417 containing the target fragment divided by the total number of restriction endonuclease  
418 fragments in the genome. For sequencing depth analysis, deeply sequenced human data was  
419 used (GSE129378). Reporter counts were normalized to reporters per 100,000 *cis* reporter  
420 fragments and replicates combined using CaptureCompare<sup>43</sup>. Alignment of *Hbb-b1/2*  
421 oligonucleotides to off target peaks was performed with Clustal $\omega$  in MacVector. Statistical  
422 comparisons were carried out using Prism. Genes were characterized as active or inactive  
423 using published H3K4me3, H3K27ac, DNaseI-seq and RNA-seq data<sup>19,23</sup>. Peak analysis was  
424 performed on the average reporter count per fragments as described<sup>34</sup> with the following  
425 modification: to adjust for overcalling in bins with sparse data residuals were normalized to  
426 have a mean of 0 and a standard deviation of 1 in each distance bin. We performed chromatin  
427 segmentation of ter119<sup>+</sup> erythroid cells using GenoSTAN<sup>24</sup>. Segmentation used a peak centric  
428 approach, rather than signal across the whole genome, with H3K4me1, H3K4me3, H3K27ac,  
429 and CTCF (GSE97871, GSE78835)<sup>19,23</sup> read coverage calculated (deepTools<sup>44</sup> v2.4.2) for 1

430 kb windows over open chromatin peaks (bedtools<sup>45</sup> merge -d 10) to capture histone  
431 modifications. The HMM model was trained using Poisson log-normal distributions with 10  
432 initial states. These were manually curated to eight final states based on similarity of chromatin  
433 signature.

434

#### 435 **ACKNOWLEDGEMENTS**

436 We thank Gerton Lunter, Ed Sanders and Ed Morrissey for their insights into the skew model.  
437 This work was carried out as part of the WIGWAM Consortium (Wellcome Investigation of  
438 Genome Wide Association Mechanisms) funded by a Wellcome Trust Strategic Award  
439 (106130/Z/14/Z) and Medical Research Council (MRC) Core Funding (MC\_UU\_00016). S.d.O  
440 was supported by an MRC Project Award (MR/N00969X/1) to J.R.H., T.B., and V.J.B.  
441 Wellcome Trust Doctoral Programmes supported C.Q.E. (203141/Z/16/Z), R.S.  
442 (203728/Z/16/Z), and A.M.O. (105281/Z/14/Z), who was also supported by the Stevenson  
443 Junior Research Fellowship (University College, Oxford). J.O.J.D. is funded by an MRC  
444 Clinician Scientist Award (MR/R008108) and received Wellcome Trust Support  
445 (098931/Z/12/Z).

446

#### 447 **AUTHOR CONTRIBUTIONS**

448 D.J.D., J.R.H., A.M.O., J.K., and J.O.J.D. designed experiments. D.J.D., M.E.G., S.J.H., and  
449 L.N. performed experiments. D.J.D., M.E.G., J.T., N.R., C.Q.E., and R.S. analysed data.  
450 S.D.O, A.S., and A.E-S, generated essential reagents. Funding was acquired by T.B. V.J.B.  
451 and J.R.H., who also supervised works carried out. D.J.D wrote the manuscript and made the  
452 figures.

453

#### 454 **COMPETING INTERESTS**

455 J.R.H and J.O.J.D. are founders and shareholders of Nucleome Therapeutics.

456

#### 457 **AVAILABILITY OF DATA AND MATERIALS**

458 Sequence reads and processed data for the active gene capture have been archived with  
459 GEO (GSE<sup>REF</sup>). Profiles for interactions of active genes in mouse erythroid cells are available  
460 at [https://capturesee.molbiol.ox.ac.uk/projects/capture\\_compare/1086](https://capturesee.molbiol.ox.ac.uk/projects/capture_compare/1086).

461 **FIGURES**

462

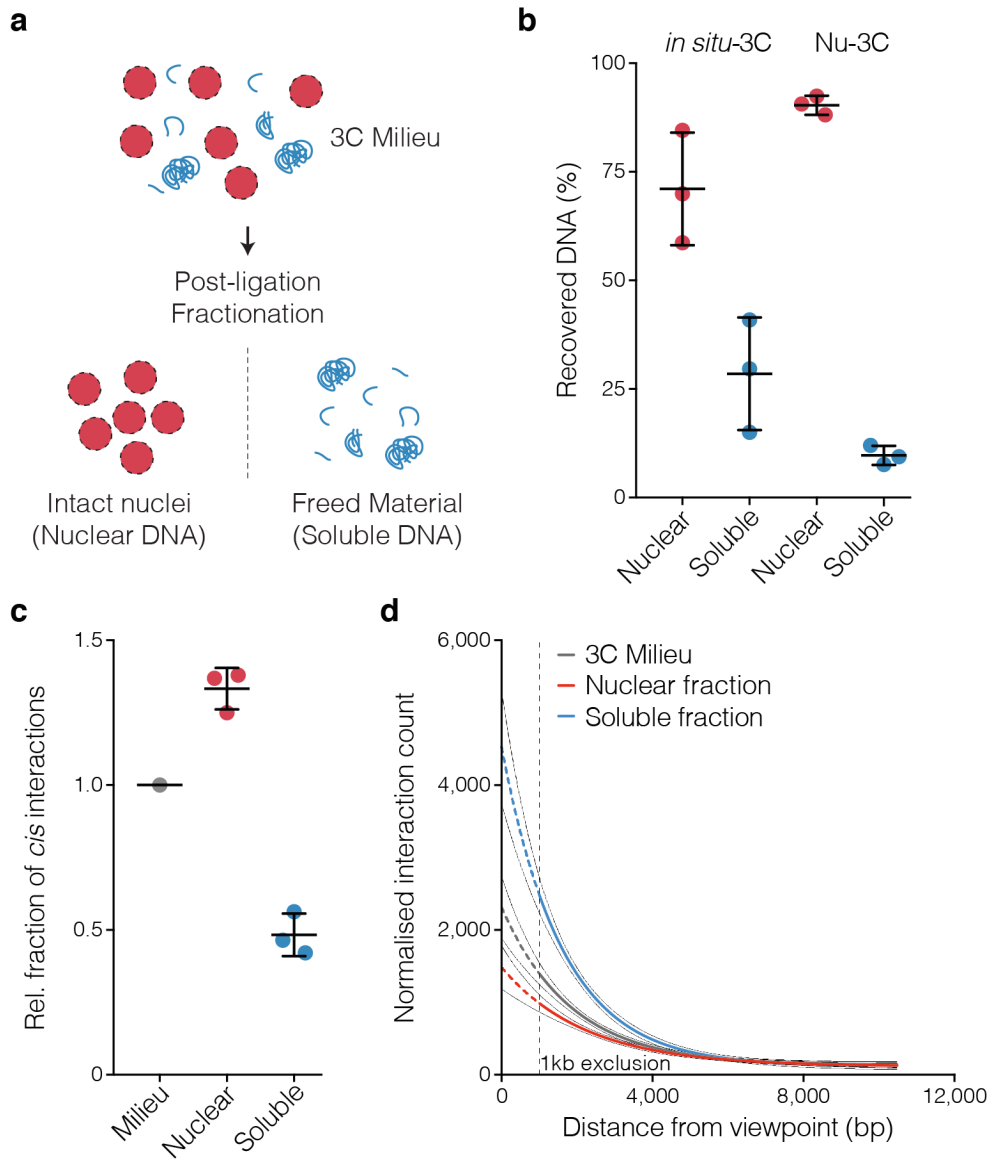

463

464

465 **Fig. 1 | The 3C library milieu can be separated into high- and low-quality fractions. a,**  
 466 **During digestion and ligation nuclei can shear leading to free soluble chromatin. Intact nuclei**  
 467 **can be separated from freed material by centrifugation. b, Percent of total DNA recovered in**  
 468 **the two fractions using standard *in situ*-3C and a modified Nuclear 3C (Nu-3C) approach. c,**  
 469 **Relative fraction of *cis* interactions for libraries generated simultaneously using *in situ*-3C with**  
 470 **and without fractionation. d, Average number of interactions within 10.5 kb of the *Hba-1/2*,**  
 471 ***Hbb-b1/2* and *Slc25a37* capture viewpoints from *in situ*-3C fractions. Bars show mean and**  
 472 **one standard deviation.**



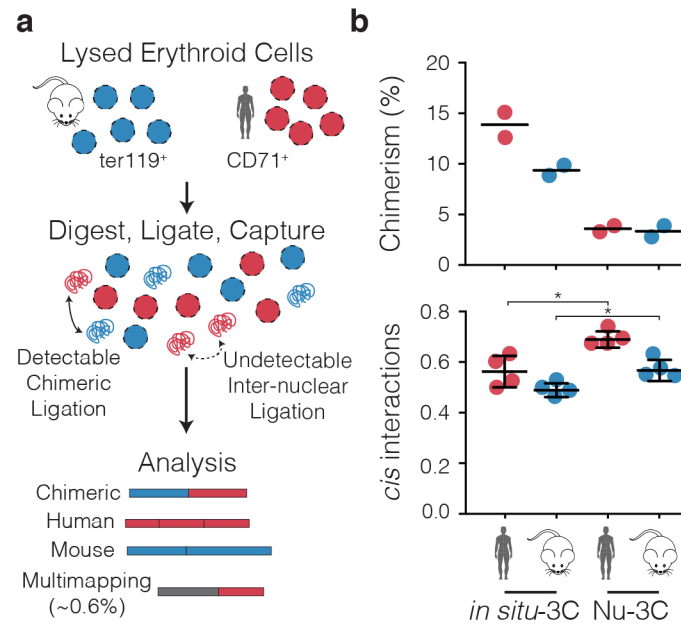

473

474

475

476

477

478

479

480

481

482

**Fig. 2 | Detection of spurious ligation through inter-species ligation. a**, Lysed erythroid cells from human and mouse were mixed in a 1:1 ratio prior to generation of 3C libraries. Ligation occurring between ruptured nuclei can be detected as inter-species chimeric DNA fragments after filtering for sequences that map to both genomes. **b**, Analysis of the level of inter-species chimeras and number of reported *cis* interactions when using standard *in situ*-3C or modified Nuclear 3C (Nu-3C) at the *Hba-1/2* and *Slc25a37* promoters (n=2). Nu-3C reduced the amount of noise in libraries from spurious internuclear ligations. Bars show mean and one standard deviation. \*p<0.05 from a Mann Witney test.

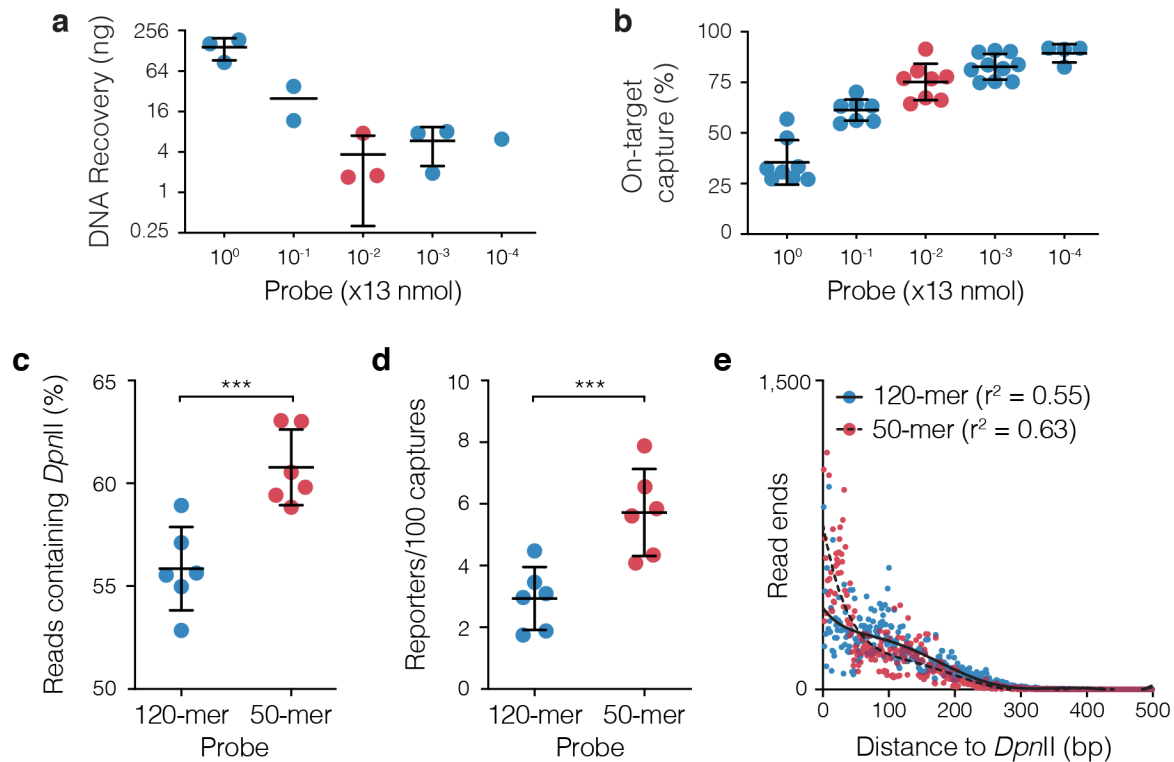

483  
484

485 **Fig. 3 | Probe concentration and length alter capture efficiency.** Total yield of DNA  
486 recovered following single capture (a) and total number of mapped reads containing on-target  
487 capture sequence following double capture (b) when 11 probe pairs were serially diluted from  
488 2.9  $\mu\text{M}$  to 0.29 nM. For DNA recovery each dot is a multiplex capture with between 3 and 6  
489 libraries. For On-target capture each dot is a separate 3C library. Bars show mean and one  
490 standard deviation. Percent of reads with a *DpnII* site (b), number of PCR duplicate filtered  
491 reporters per 100 mapped reads containing a reporter (c) following capture of six 3C libraries  
492 with 120-mer and 50-mer oligonucleotides. \*\*\* $p=0.0001$  using Mann-Witney rank sum test.  
493 Bars show mean and one standard deviation. d, Counts of read-ends generated by sonication  
494 breakpoints as the distance to the nearest end of the *Slc25a37* viewpoint. Each dot is average  
495 depth normalized count at each position for 100,000 mapped reads ( $n=12$ ). Lines of best fit  
496 were generated as a sixth order polynomial with  $r^2$  shown in the legend.  
497

498  
499

500 **Fig. 4 | Co-targeting results in target specific bias.** a, 3C libraries from mouse erythroid  
501 ( $n=3$ ) and embryonic stem cells (ESC;  $n=3$ ) were captured with either a pool of probes  
502 containing eight primary (P) viewpoints, or a pool of probes containing both the primary  
503 viewpoints and 54 additional, or secondary (S), viewpoints. Captured fragments were  
504 analyzed only for the primary viewpoints. Data is shown as an overlay for the Hba-2 capture  
505 viewpoint, with dark areas showing where signal overlaps. b, Comparison of the relative  
506 difference in interaction counts at co-targeted fragment and the adjacent fragments ( $\pm 1$ ).  
507 Average is shown for all fragments within 160 kb of the primary targets. c, Distance dependent  
508 difference in signal caused by co-targeting compared with adjacent fragments and the region  
509 average. \*\*\*\* $p<0.0001$  using Mann-Witney rank sum test. Bars show mean and one standard  
509 deviation.

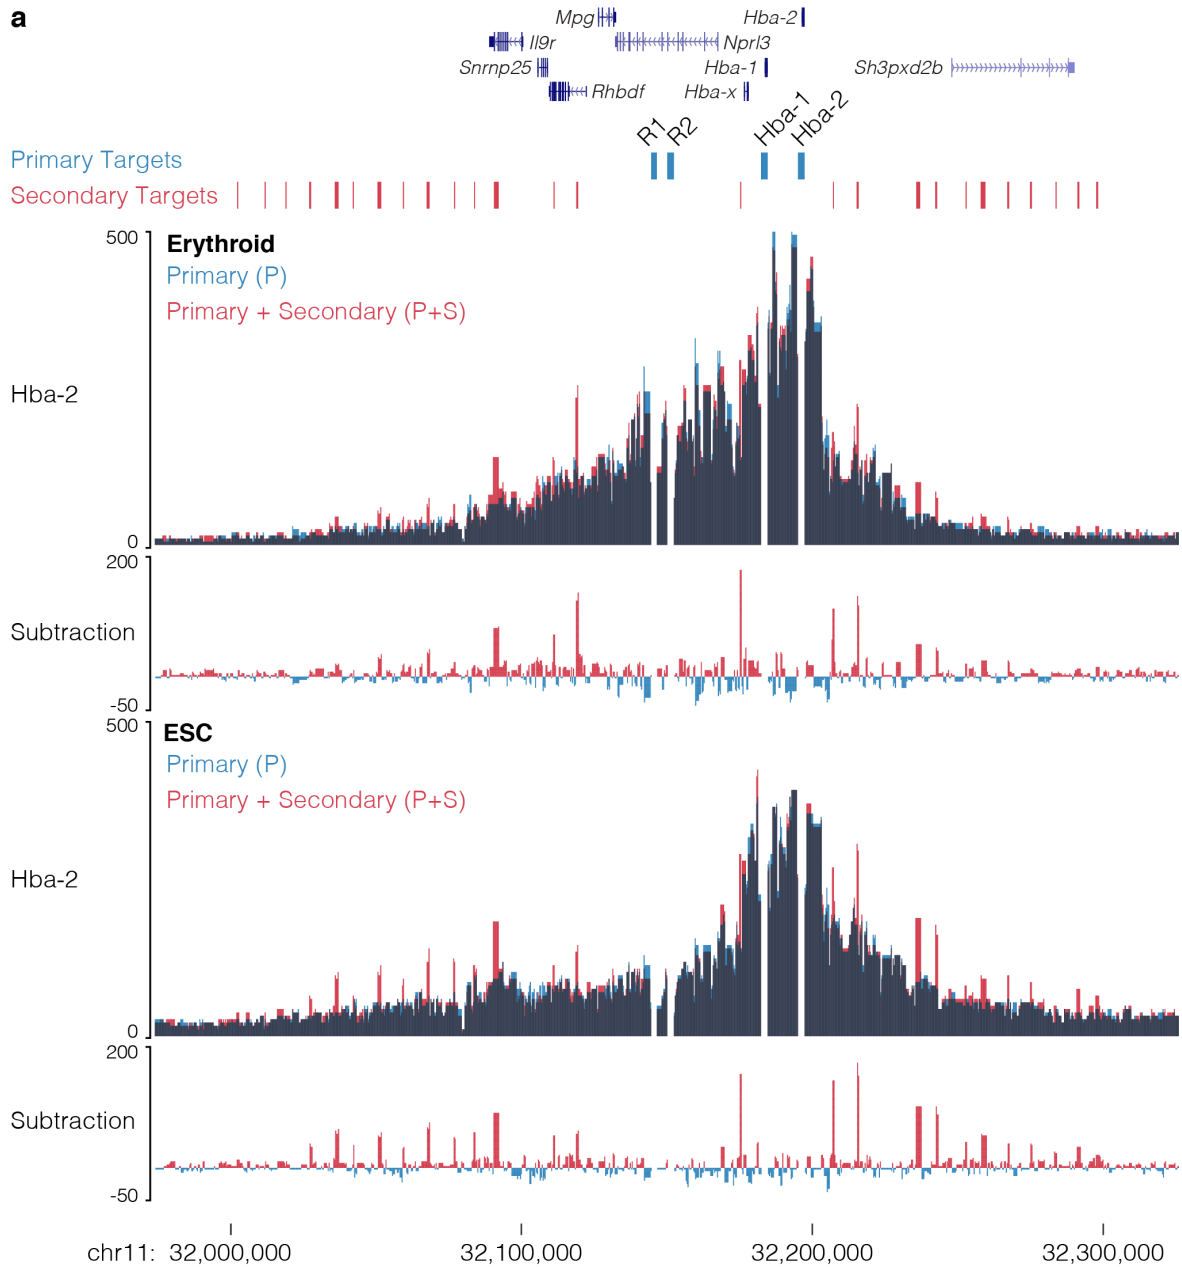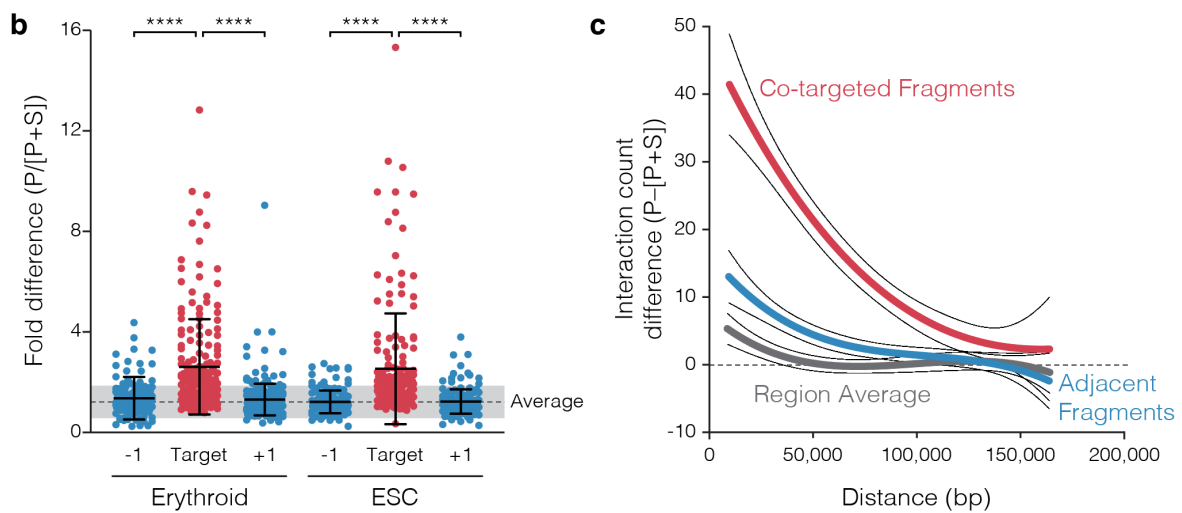

510  
511

**Fig. 4 | Co-targeting results in variable target specific bias.**

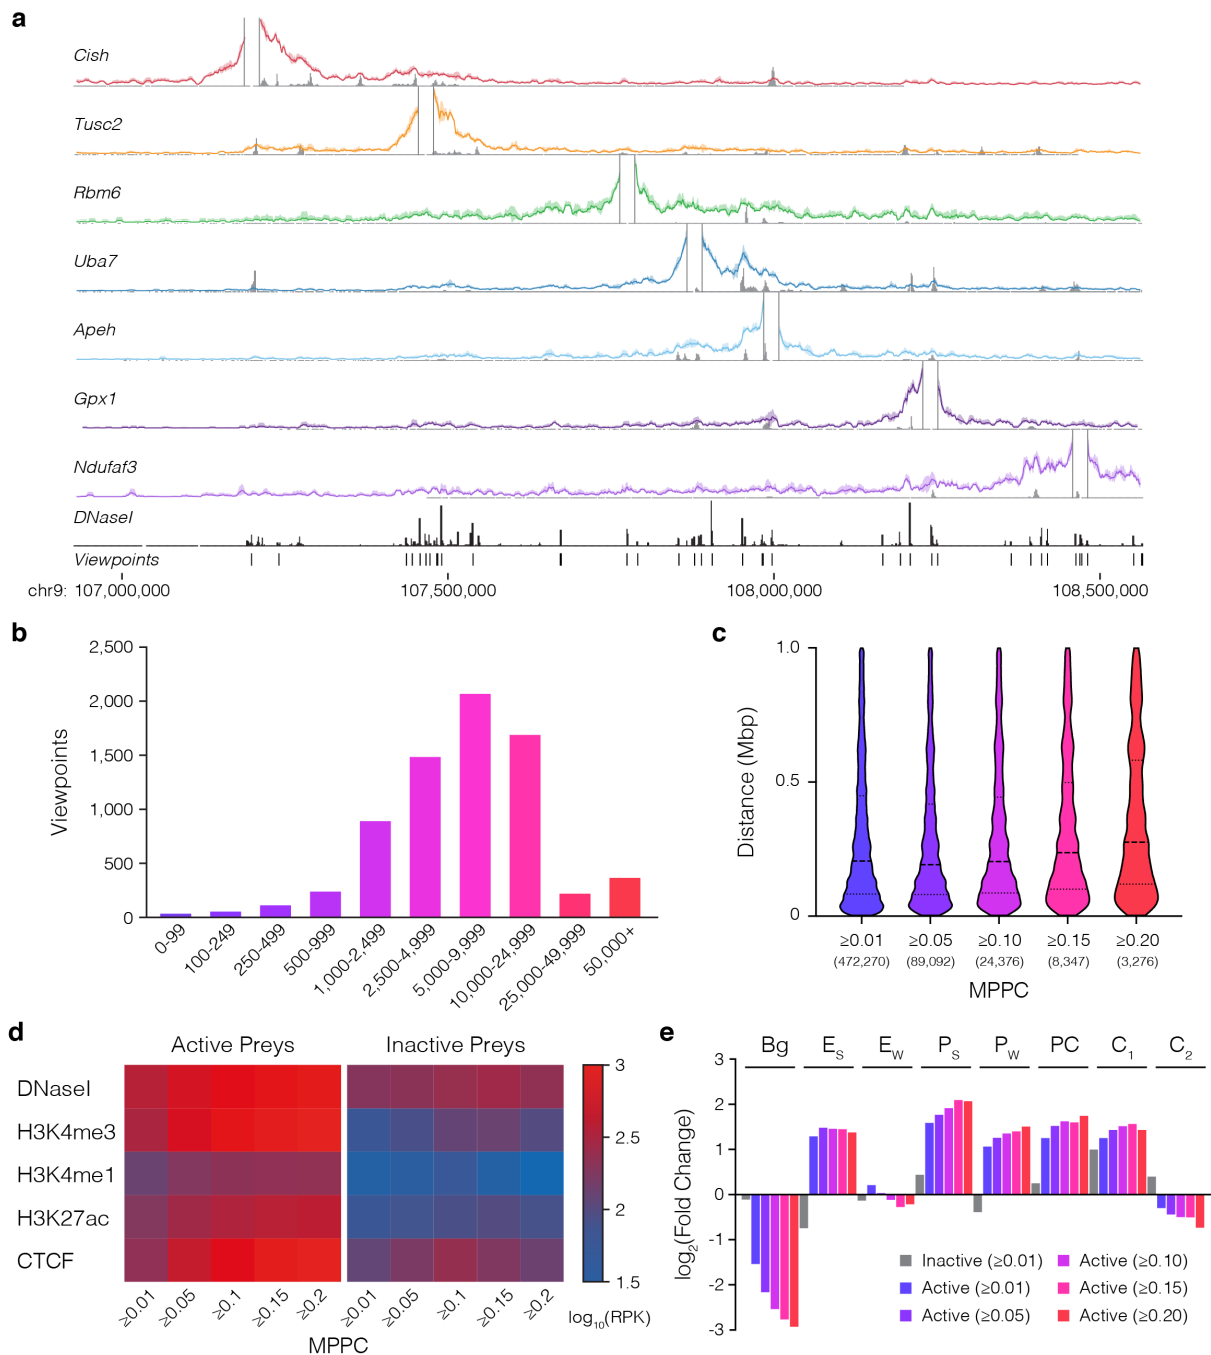

512  
 513

514 **Fig. 5 | High resolution capture of 8,026 promoters.** **a)** Windowed 3C interactions over  
 515 1.5Mb for seven NuTi Capture-C viewpoints with peaky Marginal Posterior Probability of  
 516 Contact (MPPC) scores in grey (mm9: chr9:106926158-108566246) **b)** Histogram of total  
 517 number of unique reporters identified per viewpoint from triplicate 3C libraries. **c)** Violin plots  
 518 of the distance between the midpoints of captured promoters and peaky identified interacting  
 519 fragments with increasing MPPC thresholds. **d)** Chromatin signal for interacting fragments  
 520 (preys) of increasing MPPC identified by capturing either active or inactive promoters **e)**  
 521 Enrichment of GenoSTAN annotations for interacting fragments with increasing MPPC. Bg:  
 522 background, E<sub>s</sub>: Enhancer (Strong H3K27ac), E<sub>w</sub>: Enhancer (Weak H3K27ac), P<sub>s</sub>: Promoter  
 523 (Strong H3K27ac), P<sub>w</sub>: Promoter (Weak H3K27ac), PC: Promoter/CTCF, C<sub>1</sub>: CTCF near  
 524 Promoter/Enhancer, C<sub>2</sub>: CTCF.

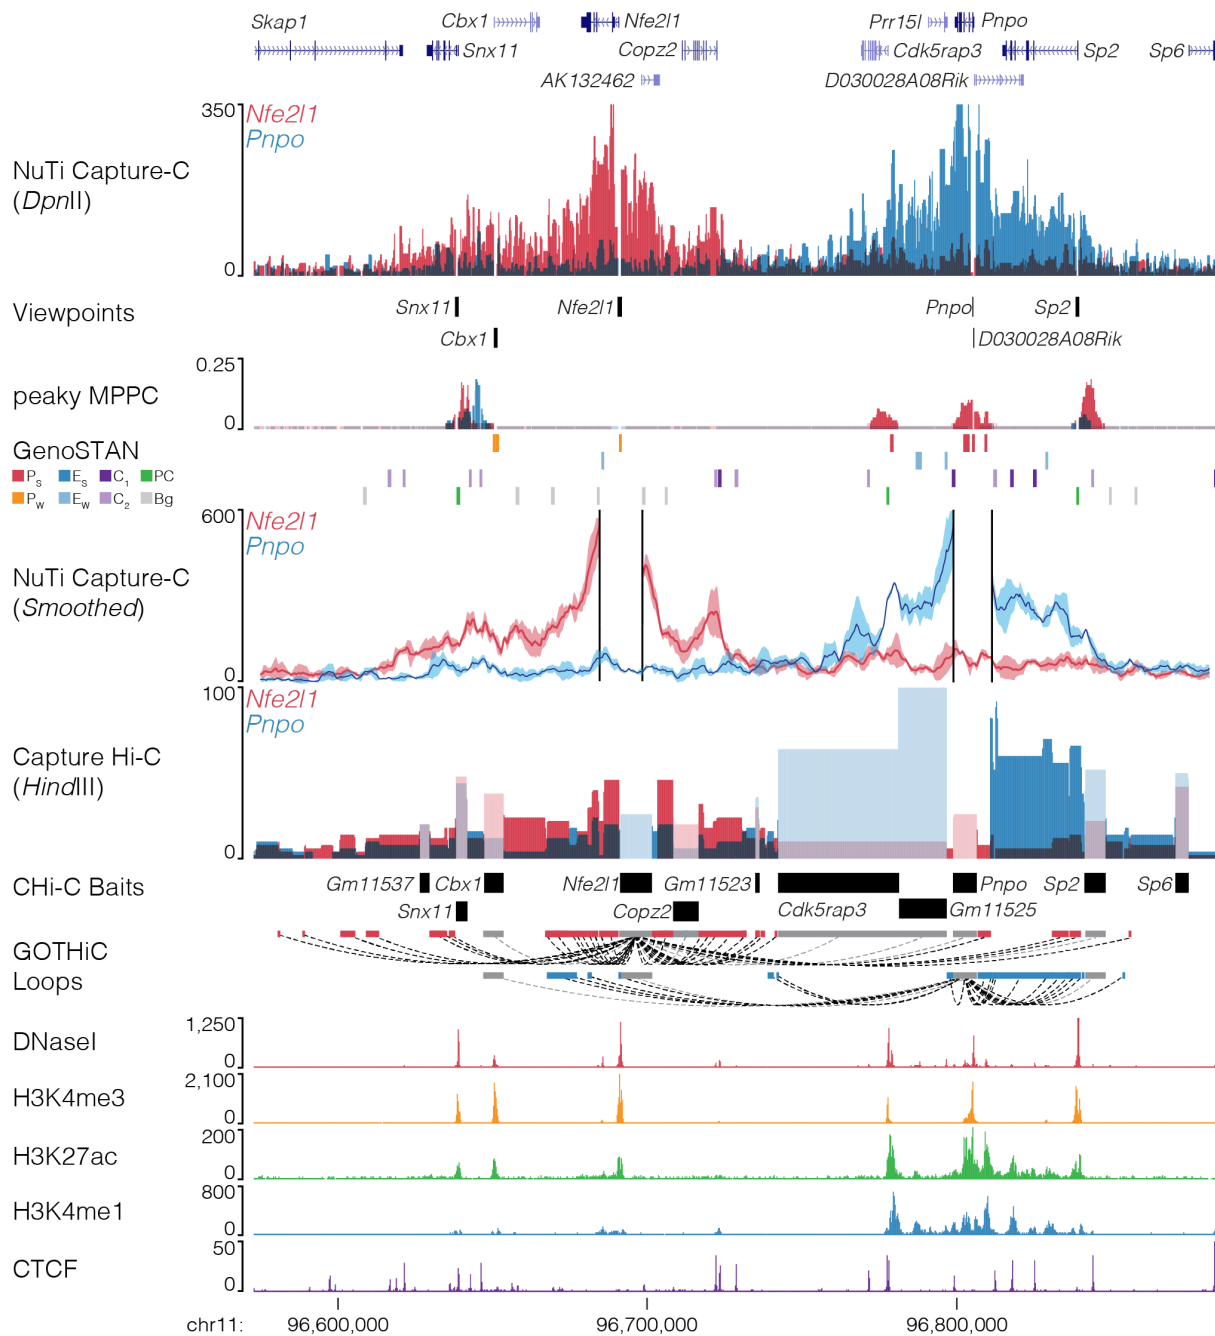

525

526

527 **Fig. 6 | Comparison of capture methods at the *Nfe2l1* and *Pnpo* promoters.** Sequence  
 528 tracks showing the difference between high-resolution 3C (*DpnII*, NuTi Capture-C) and low-  
 529 resolution 3C (*HindIII*, Capture Hi-C) from nearby gene promoters (mm9, chr11:96,572,876-  
 530 96,883,917) in erythroid cells. Tracks in order: UCSC gene annotation, *cis*-normalized mean  
 531 interactions per *DpnII* fragment using NuTi Capture-C (n=3), NuTi Capture-C viewpoints,  
 532 peaky Marginal Posterior Probability of Contact (MPPC) scores with fragments with MPPC  
 533  $\geq 0.01$  darker, GenoSTAN open chromatin classification, windowed mean interactions using  
 534 NuTi Capture-C, total supporting reads per *HindIII* fragment with CHI-C (n=2; co-targeted  
 535 fragments are lighter in colour), CHI-C bait fragments, loops between reported significantly  
 536 interacting fragments (co-targeting loops are coloured grey), erythroid tracks for open  
 537 chromatin (DNaseI), promoters (H3K4me3), active transcription (H3K27ac), enhancers  
 538 (H3K4me1), and boundaries (CTCF). Note overlapping blue and red signals appear darker in  
 539 colour (NuTi Capture-C, peaky MPPC, CHI-C).

540 **REFERENCES**

- 541 1. Dekker, J., Rippe, K., Dekker, M. & Kleckner, N. Capturing Chromosome  
542 Conformation. *Science (80-. )*. **295**, 1306–1311 (2002).
- 543 2. Davies, J. O. J., Oudelaar, A. M., Higgs, D. R. & Hughes, J. R. How best to identify  
544 chromosomal interactions: a comparison of approaches. *Nat. Methods* **14**, 125–134  
545 (2017).
- 546 3. Lieberman-Aiden, E. *et al.* Comprehensive Mapping of Long-Range Interactions  
547 Reveals Folding Principles of the Human Genome. *Science (80-. )*. **326**, 289–293  
548 (2009).
- 549 4. Mifsud, B. *et al.* Mapping long-range promoter contacts in human cells with high-  
550 resolution capture Hi-C. *Nat. Genet.* **47**, 598–606 (2015).
- 551 5. Hughes, J. R. *et al.* Analysis of hundreds of cis-regulatory landscapes at high  
552 resolution in a single, high-throughput experiment. *Nat. Genet.* **46**, 205–12 (2014).
- 553 6. Zhao, Z. *et al.* Circular chromosome conformation capture (4C) uncovers extensive  
554 networks of epigenetically regulated intra- and interchromosomal interactions. *Nat.*  
555 *Genet.* **38**, 1341–1347 (2006).
- 556 7. Simonis, M. *et al.* Nuclear organization of active and inactive chromatin domains  
557 uncovered by chromosome conformation capture–on-chip (4C). *Nat. Genet.* **38**,  
558 1348–1354 (2006).
- 559 8. Davies, J. O. J. *et al.* Multiplexed analysis of chromosome conformation at vastly  
560 improved sensitivity. *Nat. Methods* **13**, 74–80 (2016).
- 561 9. Oudelaar, A. M., Davies, J. O. J., Downes, D. J., Higgs, D. R. & Hughes, J. R. Robust  
562 detection of chromosomal interactions from small numbers of cells using low-input  
563 Capture-C. *Nucleic Acids Res.* **45**, (2017).
- 564 10. Gavrilov, A. A. *et al.* Disclosure of a structural milieu for the proximity ligation reveals  
565 the elusive nature of an active chromatin hub. *Nucleic Acids Res.* **41**, 3563–3575  
566 (2013).
- 567 11. Schoenfelder, S. *et al.* The pluripotent regulatory circuitry connecting promoters to  
568 their long-range interacting elements. *Genome Res.* **25**, 582–597 (2015).
- 569 12. Eijsbouts, C. Q., Burren, O. S., Newcombe, P. J. & Wallace, C. Fine mapping  
570 chromatin contacts in capture Hi-C data. *BMC Genomics* **20**, 77 (2019).
- 571 13. Denker, A. & Laat, W. De. The second decade of 3C technologies : detailed insights  
572 into nuclear organization. 1357–1382 (2016). doi:10.1101/gad.281964.116.
- 573 14. Schwartzman, O. *et al.* UMI-4C for quantitative and targeted chromosomal contact  
574 profiling. *Nat. Methods* **13**, 685–91 (2016).
- 575 15. Mumbach, M. R. *et al.* HiChIP: efficient and sensitive analysis of protein-directed  
576 genome architecture. *Nat. Methods* **13**, 919–922 (2016).
- 577 16. Li, G. *et al.* Chromatin Interaction Analysis with Paired-End Tag (ChIA-PET)  
578 sequencing technology and application. *BMC Genomics* **15**, S11 (2014).
- 579 17. Zheng, M. *et al.* Multiplex chromatin interactions with single-molecule precision.  
580 *Nature* **566**, 558–562 (2019).
- 581 18. Mumbach, M. R. *et al.* HiChIRP reveals RNA-associated chromosome conformation.  
582 *Nat. Methods* **16**, 489–492 (2019).
- 583 19. Hay, D. *et al.* Genetic dissection of the  $\alpha$ -globin super-enhancer in vivo. *Nat. Genet.*  
584 1–12 (2016). doi:10.1038/ng.3605
- 585 20. Bender, M. A. *et al.* The hypersensitive sites of the murine  $\beta$ -globin locus control

- 586 region act independently to affect nuclear localization and transcriptional elongation.  
587 *Blood* **119**, 3820–3827 (2012).
- 588 21. Oudelaar, A. M. *et al.* Single-allele chromatin interactions identify regulatory hubs in  
589 dynamic compartmentalized domains. *Nat. Genet.* **50**, 1744–1751 (2018).
- 590 22. Oudelaar, A. M., Downes, D., Davies, J. & Hughes, J. Low-input Capture-C: A  
591 Chromosome Conformation Capture Assay to Analyze Chromatin Architecture in  
592 Small Numbers of Cells. *BIO-PROTOCOL* **7**, (2017).
- 593 23. Hanssen, L. L. P. *et al.* Tissue-specific CTCF – cohesin-mediated chromatin  
594 architecture delimits enhancer interactions and function in vivo. *Nat. Cell Biol.* **19**,  
595 952–961 (2017).
- 596 24. Zacher, B. *et al.* Accurate promoter and enhancer identification in 127 ENCODE and  
597 roadmap epigenomics cell types and tissues by GenoSTAN. *PLoS One* **12**, 1–25  
598 (2017).
- 599 25. Simon, C. S. *et al.* Functional characterisation of cis -regulatory elements governing  
600 dynamic Eomes expression in the early mouse embryo. *Development* **144**, 1249–  
601 1260 (2017).
- 602 26. Brown, J. M. *et al.* A tissue-specific self-interacting chromatin domain forms  
603 independently of enhancer-promoter interactions. *Nat. Commun.* **9**, 1–15 (2018).
- 604 27. Schäfer, A. *et al.* Impaired DNA demethylation of C / EBP sites causes premature  
605 aging. *Genes Dev.* **32**, 742–762 (2018).
- 606 28. Godfrey, L. *et al.* DOT1L inhibition reveals a distinct subset of enhancers dependent  
607 on H3K79 methylation. *Nat. Commun.* **10**, 1–15 (2019).
- 608 29. Blackledge, N. P. *et al.* PRC1 Catalytic Activity Is Central to Polycomb System  
609 Function. *Mol. Cell* **77**, 1–18 (2020).
- 610 30. Rhodes, J. D. P. *et al.* Cohesin Disrupts Polycomb-Dependent Chromosome  
611 Interactions in Embryonic Stem Cells. *Cell Rep.* **30**, 820–835 (2020).
- 612 31. Furlan, G. *et al.* The Ftx Noncoding Locus Controls X Chromosome Inactivation  
613 Independently of Its RNA Products Article. *Mol. Cell* **70**, 462–472 (2018).
- 614 32. van Bommel, J. G. *et al.* The bipartite TAD organization of the X-inactivation center  
615 ensures opposing developmental regulation of Tsix and Xist. *Nat. Genet.* **51**, (2019).
- 616 33. Hyle, J. *et al.* Acute depletion of CTCF directly affects MYC regulation through loss of  
617 enhancer–promoter looping. *Nucleic Acids Res.* **47**, 6699–6713 (2019).
- 618 34. Downes, D. J. *et al.* An integrated platform to systematically identify causal variants  
619 and genes for polygenic human traits. *bioRxiv* 813618 (2019). doi:10.1101/813618
- 620 35. Thurner, M. *et al.* Integration of human pancreatic islet genomic data refines  
621 regulatory mechanisms at Type 2 Diabetes susceptibility loci. *Elife* **7**, 1–30 (2018).
- 622 36. Cairns, J. *et al.* CHiCAGO: robust detection of DNA looping interactions in Capture Hi-  
623 C data. *Genome Biol.* **17**, 127 (2016).
- 624 37. Geeven, G., Teunissen, H., de Laat, W. & de Wit, E. peakC: a flexible, non-parametric  
625 peak calling package for 4C and Capture-C data. *Nucleic Acids Res.* **46**, e91–e91  
626 (2018).
- 627 38. Thongjuea, S., Stadhouders, R., Grosveld, F. G., Soler, E. & Lenhard, B. R3Cseq: An  
628 R/Bioconductor package for the discovery of long-range genomic interactions from  
629 chromosome conformation capture and next-generation sequencing data. *Nucleic  
630 Acids Res.* **41**, 1–18 (2013).
- 631 39. Klein, F. A. *et al.* FourCSeq: analysis of 4C sequencing data. *Bioinformatics* **31**,

- 632 3085–3091 (2015).
- 633 40. Monahan, K., Horta, A. & Lomvardas, S. LHX2- and LDB1-mediated trans interactions  
634 regulate olfactory receptor choice. *Nature* **565**, 448–453 (2019).
- 635 41. Scott, C. *et al.* Culture of hematopoietic progenitors from CDA-I patients reproduces in  
636 vivo disease-specific phenotypes for diagnosis. *Prep.*
- 637 42. Oudelaar, A. M. *et al.* Dissection of the 4D chromatin structure of the  $\alpha$ -globin locus  
638 through in vivo erythroid differentiation with extreme spatial and temporal resolution.  
639 *bioRxiv* 763763 (2019). doi:10.1101/763763
- 640 43. Telenius, J. M. *et al.* CaptureCompendium : a comprehensive toolkit for 3C analysis .  
641 *bioRxiv* 1–18 (2020). doi:<https://doi.org/10.1101/2020.02.17.952572>
- 642 44. Ramírez, F. *et al.* deepTools2: a next generation web server for deep-sequencing  
643 data analysis. *Nucleic Acids Res.* **44**, W160–W165 (2016).
- 644 45. Quinlan, A. R. & Hall, I. M. BEDTools: A flexible suite of utilities for comparing  
645 genomic features. *Bioinformatics* **26**, 841–842 (2010).
- 646



647 **SUPPLEMENTARY MATERIAL**

648

649 **Supplementary Table 1. Capture oligonucleotide sequence and co-ordinates (mm9)**

650

651 **Supplementary Note. Mathematical modelling of co-capture bias**

652

653 **Supplementary Figures. 1-29**

654

655

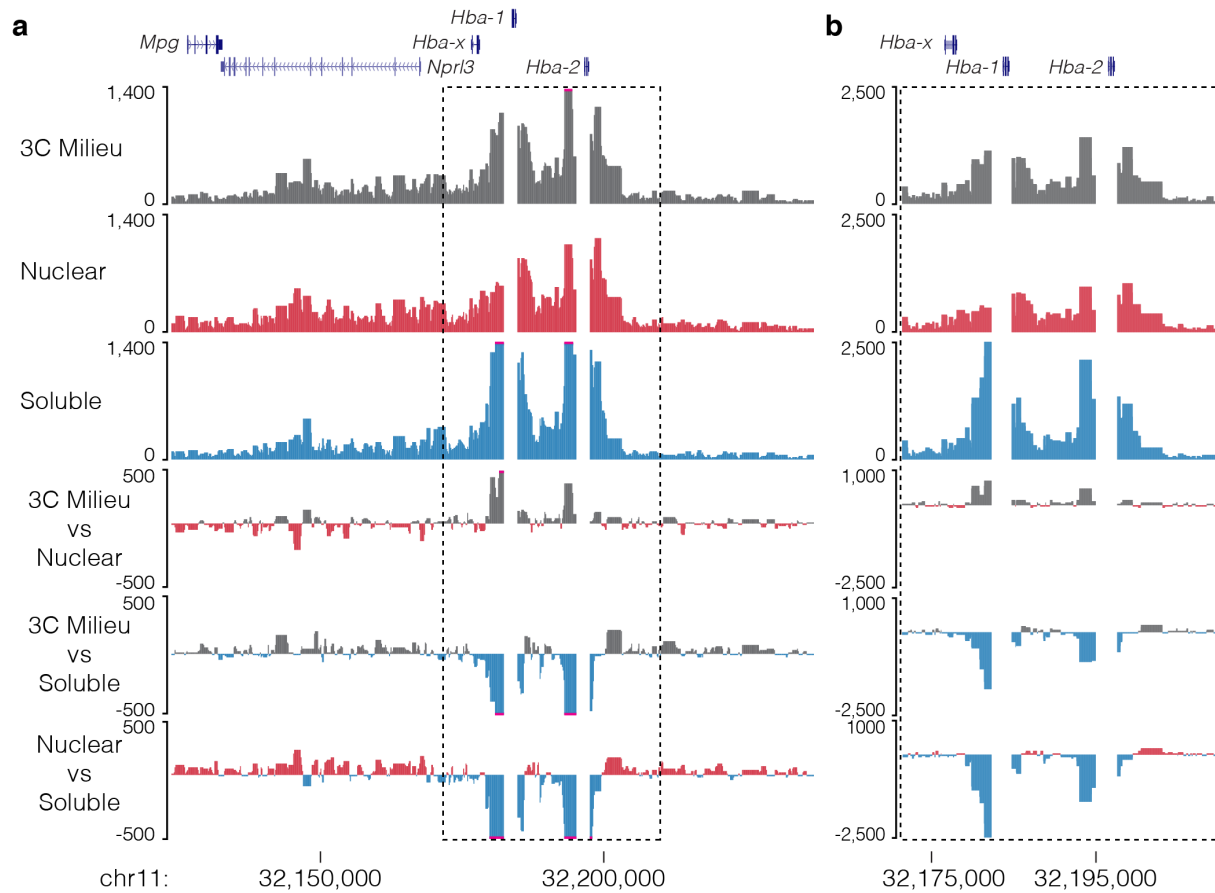

656

657

658 **Supp. Fig. 1 | Soluble 3C material has a higher proximity signal.** Capture profiles and

659 comparison tracks for *Hba-1/2* capture in mouse erythroid cells (a) from total 3C library Milieu

660 or its fractionated nuclear and soluble fractions shows soluble material has a higher proximity

661 signal (b), likely from small diffusing chunks of digested crosslinked chromatin.

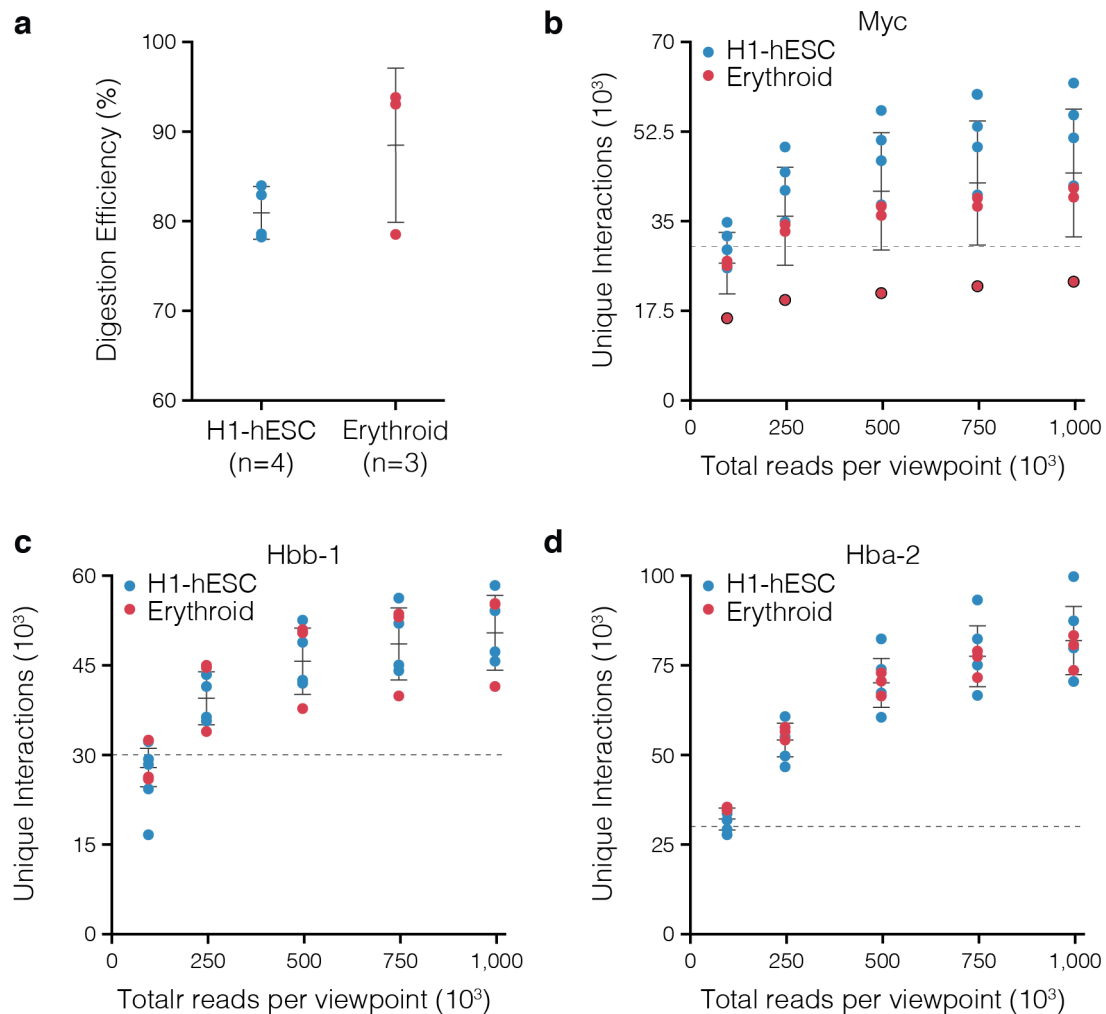

662  
663

664 **Supp. Fig. 2 | Reporter sensitivity through sequencing depth.** a, Digestion efficiency for  
665 Nu-3C libraries from human embryonic stem cells (H1-hESC) and erythroid cells. NuTi  
666 Capture-C was performed for the seven multiplexed libraries targeting *Myc* (b),  
667 *Hbb-b1/2* (c), and *Hba-1/2* (d) and sequenced to over  $10^6$  reads per viewpoint per library. Sequence files  
668 were subsampled and analyzed to determine number of unique reporters. Dashed lines  
669 represent 30,000 unique reporters, or extremely high-sensitivity capture. For *Myc*, one donor  
670 has a polymorphism that removes one of the two *DpnII* sites on the targeted fragment (black  
671 outline) – illustrating the effect of using a single probe. Bars show mean and one standard  
672 deviation.

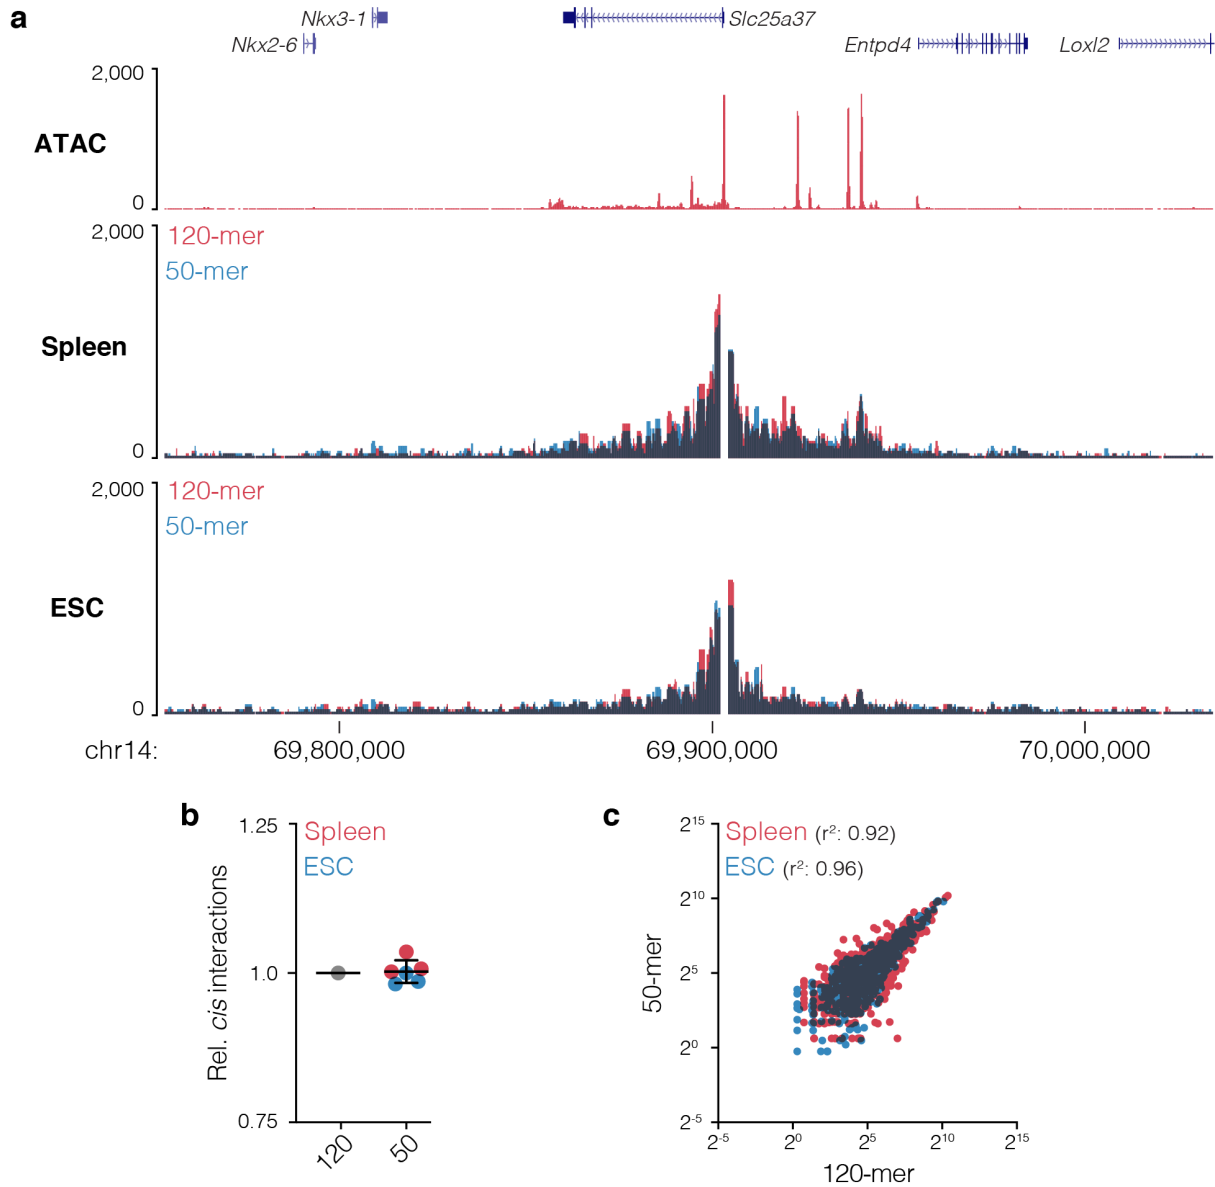

673

674

675 **Supp. Fig. 3 | Capture of *Slc25a37* with short probes.** **a**, Overlaid 3C interaction profile for  
676 *Slc25a37*, which encodes mitoferrin, from mouse erythroid (n=3) and embryonic stem cells  
677 (ESC, n=3) captured with either 120-mer or 50-mer probes. Darkened areas show overlapping  
678 signals. **b**, Number of cis reporters relative to 120-mer capture. **c**, Comparison of interactions  
679 counts from using long or short probes for fragments displayed in panel **a** with Pearson's  
680 correlation.

681

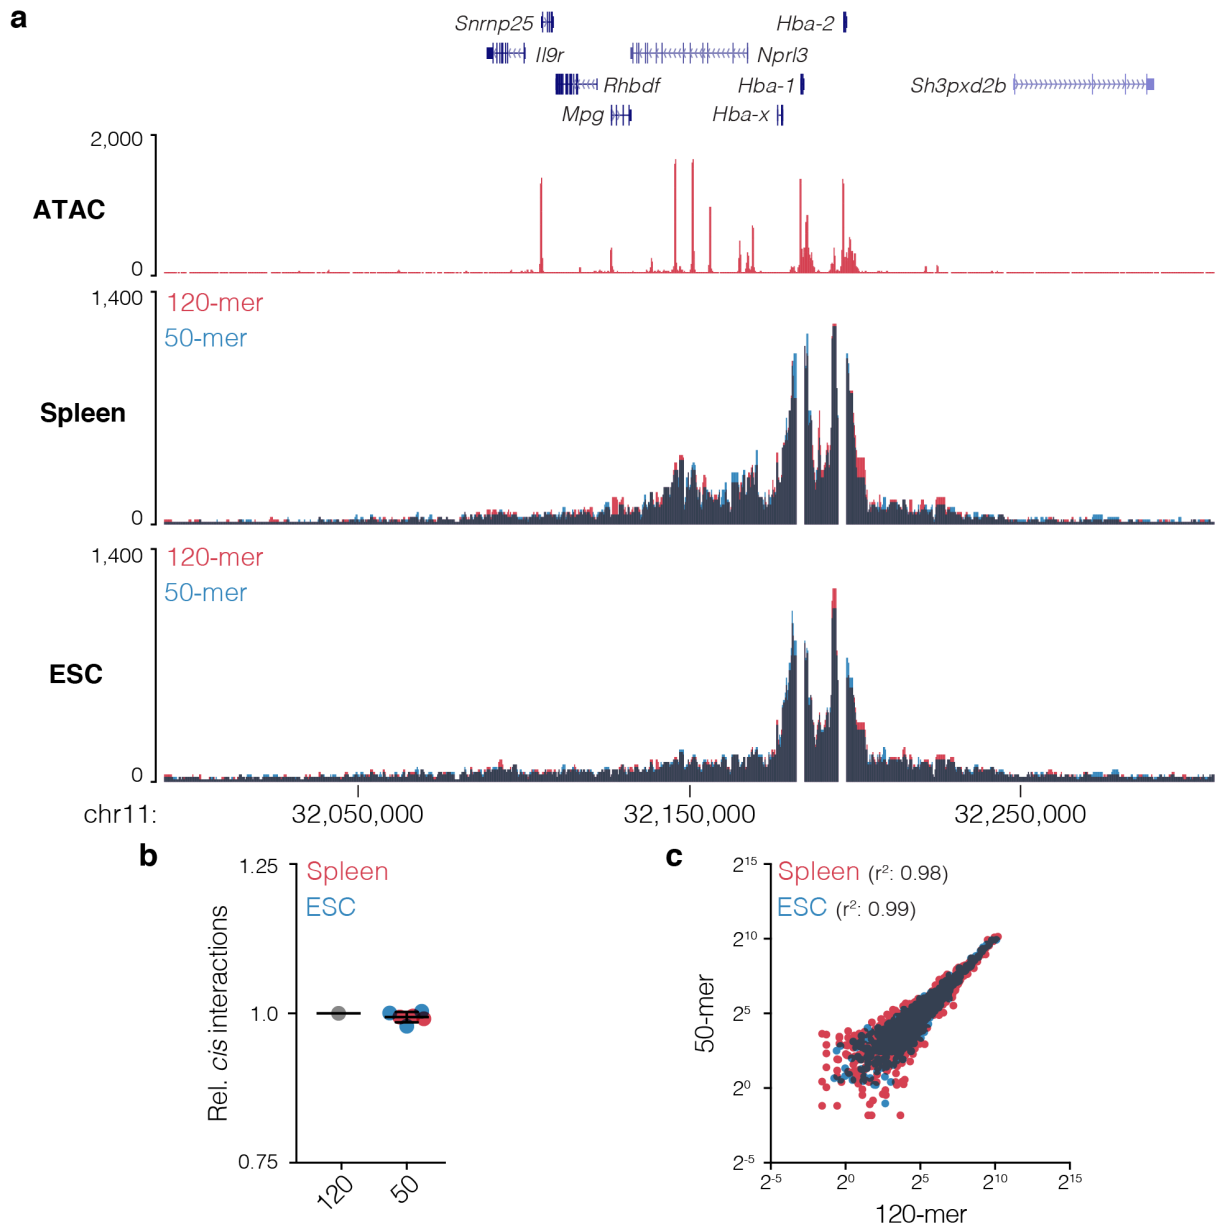

682

683

684 **Supp. Fig. 4 | Capture of  $\alpha$ -globin locus with short probes.** **a**, Overlaid 3C interaction  
685 profile for *Hba-1* and *Hba-2*, which encode  $\alpha$ -globin, from mouse erythroid (n=3) and  
686 embryonic stem cells (ESC, n=3) captured with either 120-mer or 50-mer probes. Darkened  
687 areas show overlapping signals. **b**, Number of cis reporters relative to 120-mer capture. **c**,  
688 Comparison of interactions counts from using long or short probes for fragments displayed in  
689 panel **a** with Pearson's correlation.

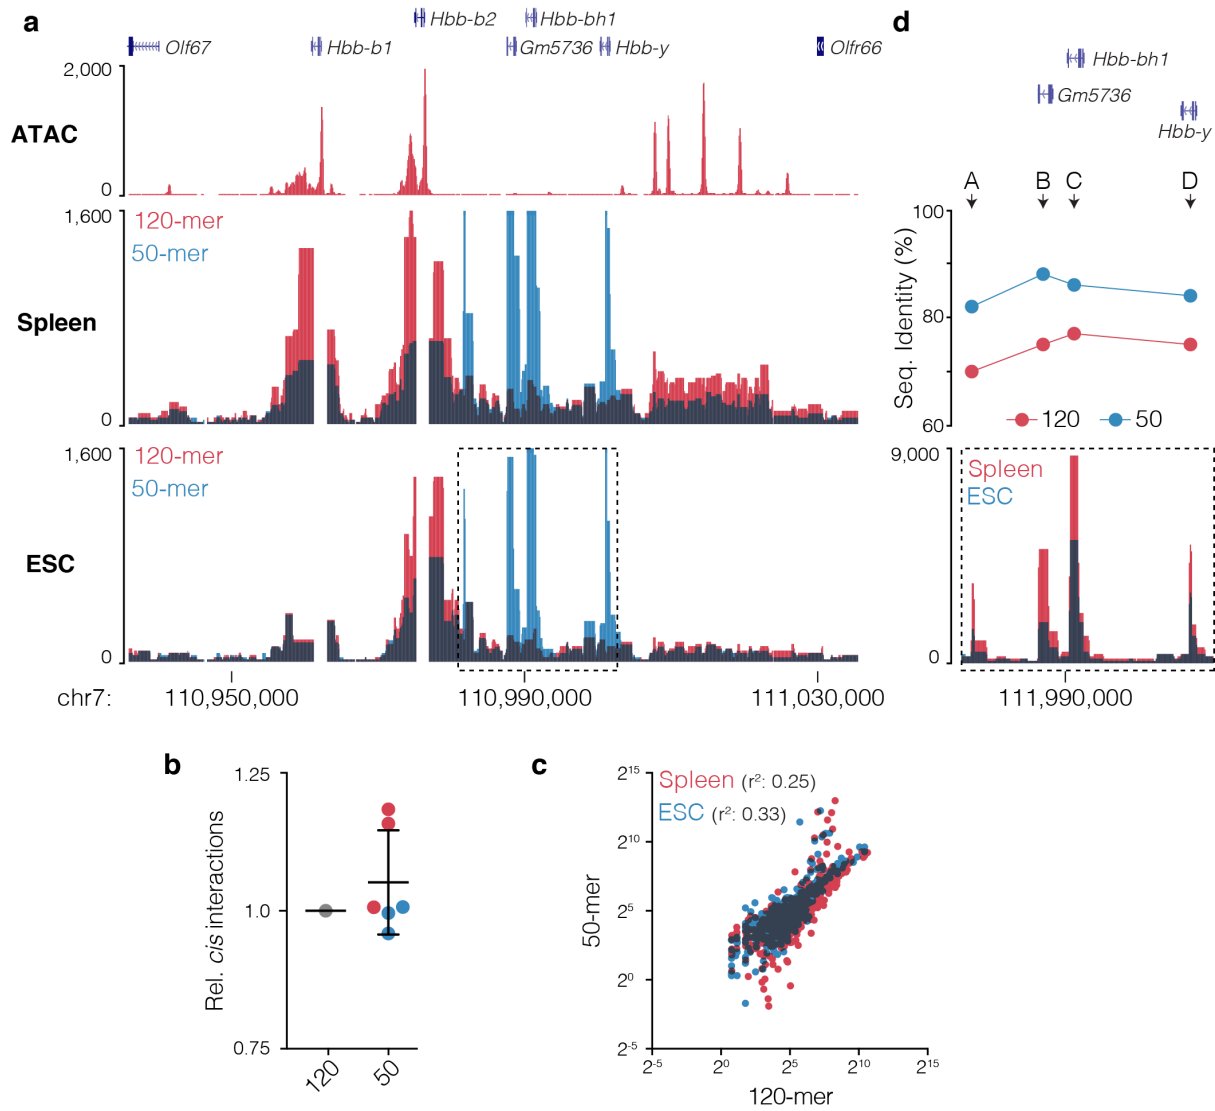

690  
691

692 **Supp. Fig. 5 | Capture of  $\beta$ -globin locus with short probes.** **a**, Overlaid *cis*-normalized 3C  
693 interaction profile for *Hbb-b1* and *Hbb-b2*, which encode  $\beta$ -globin, from mouse erythroid (n=3)  
694 and embryonic stem cells (ESC, n=3) captured with either 120-mer or 50-mer probes.  
695 Darkened areas show overlapping signals. **b**, Number of cis reporters relative to 120-mer  
696 capture. **c**, Comparison of interactions counts from using long or short probes for fragments  
697 displayed in panel **a** with Pearson's correlation. **d**, Clustal $\omega$  determined sequence identity for  
698 120-mer and 50-mer probes with the four novel peaks of interactions seen with the shorter  
699 probes.

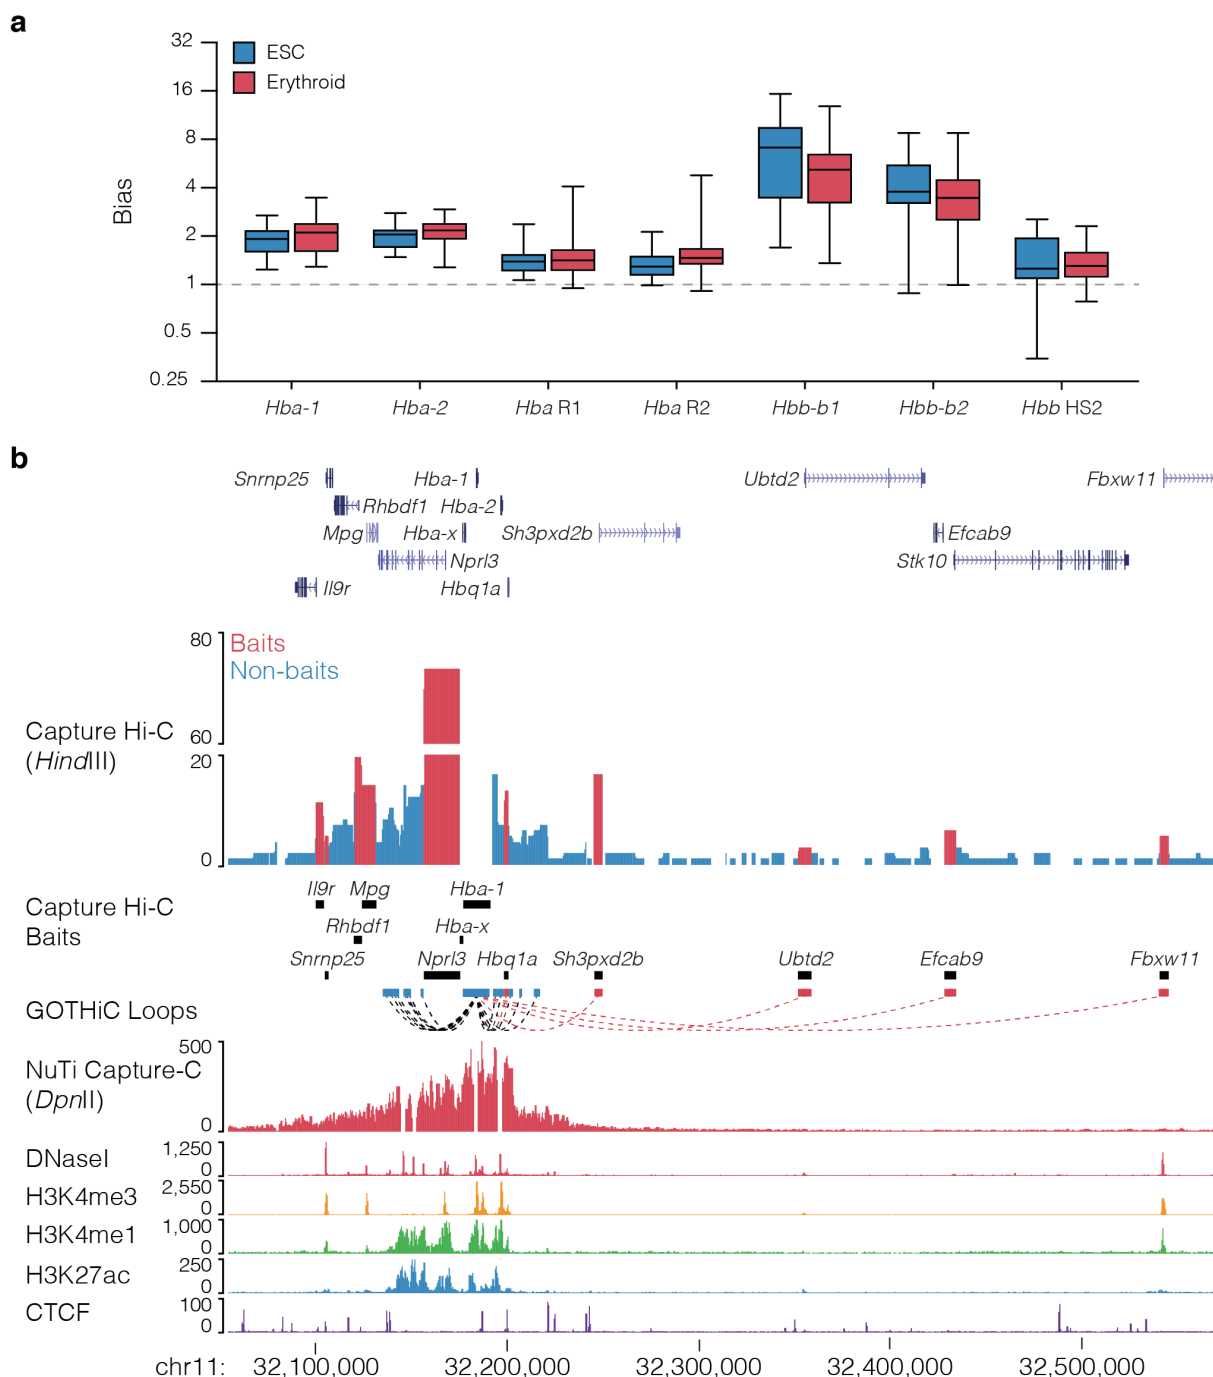

700  
 701 **Supp. Fig. 6 | Co-targeting bias observed in Capture-C and Capture Hi-C. a,** Per viewpoint  
 702 levels of bias at co-targeted viewpoints around the  $\alpha$ -globin locus (*Hba-1* and *Hba-2*  
 703 promoters, R1 and R2 enhancers) and the  $\beta$ -globin locus (*Hbb-b1* and *Hbb-b2* promoters,  
 704 HS2 enhancer). Levels of bias varies across viewpoints and co-targeted fragments but not  
 705 between erythroid and embryonic stem cells (ESC) indicating bias is primarily caused through  
 706 the identity of the targeted fragment rather than by cell type signal. **b,** Comparison of the 3C  
 707 interaction profiles for *Hba-1* generated with Capture Hi-C (targeting all promoters) and NuTi  
 708 Capture-C (targeting specifically *Hba-1/2* and their two main enhancers – excluded from  
 709 analysis and seen as gaps in the signal). Total interaction counts for CHi-C in erythroid cells  
 710 are shown (n=2), fragments and reported significant interactions involving co-targeting  
 711 coloured red. Note that the peaks over reported long-range significant interactions are not  
 712 present in NuTi Capture-C and occur specifically at co-targeted fragments (and not adjacent  
 713 fragments). Erythroid tracks show open chromatin (DNaseI), promoters (H3K4me3), active  
 714 transcription (H3K27ac), enhancers (H3K4me1), and boundaries (CTCF).

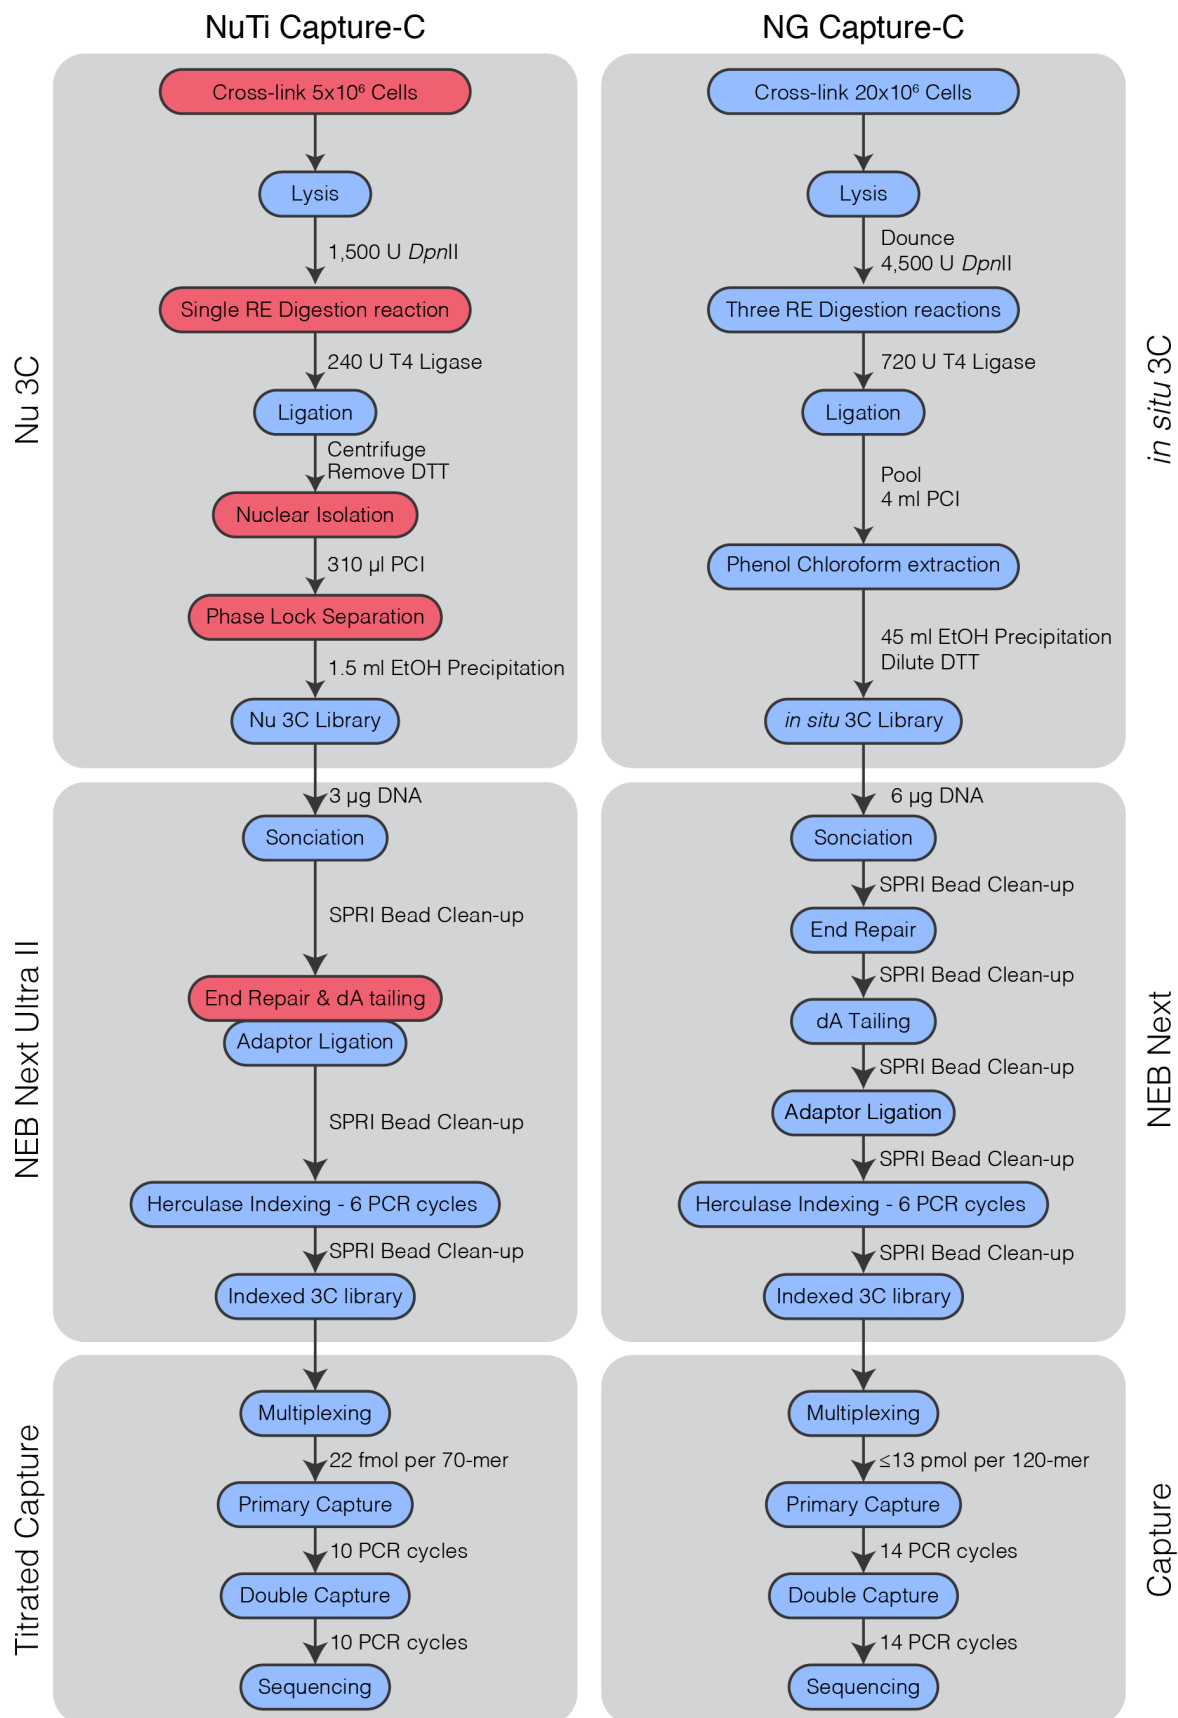

715  
716  
717  
718  
719  
720  
721

**Supp. Fig. 7 | Capture-C workflows.** Comparison of experimental workflows for Nuclear-Titrated (NuTi) and Next Generation (NG) Capture-C. Main steps are in blue bubbles, with key innovations for NuTi Capture-C highlighted by red bubbles. Differences in reagents and PCR cycles are shown at individual steps. DTT: Dithiothreitol, PCI: Phenol-Chloroform Isoamyl-alcohol, EtOH: ethanol, SPRI: solid phase reversible immobilisation.

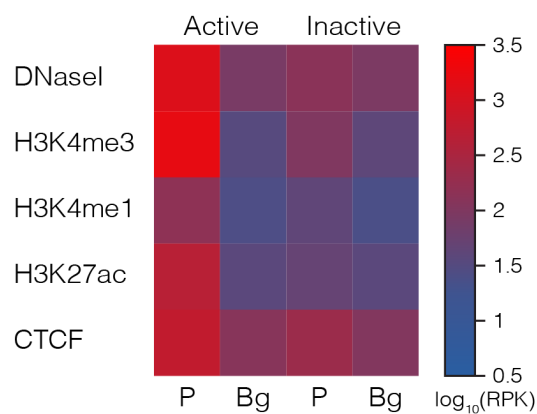

722  
723

724 **Supp. Fig. 8 | Chromatin signature of captured promoters.** Average sequence coverage  
725 signature of promoter (P) containing fragments (±1kb) classified as active (n=7,014) or inactive  
726 (n=181). Chromatin marks from mouse erythroid cells show open chromatin (DNaseI),  
727 promoters (H3K4me3), active transcription (H3K27ac), enhancers (H3K4me1), and  
728 boundaries (CTCF). Background (Bg) signal was calculated by generating random peaks of  
729 the same number and size using BEDtools shuffle. RPK: reads per kilobase.



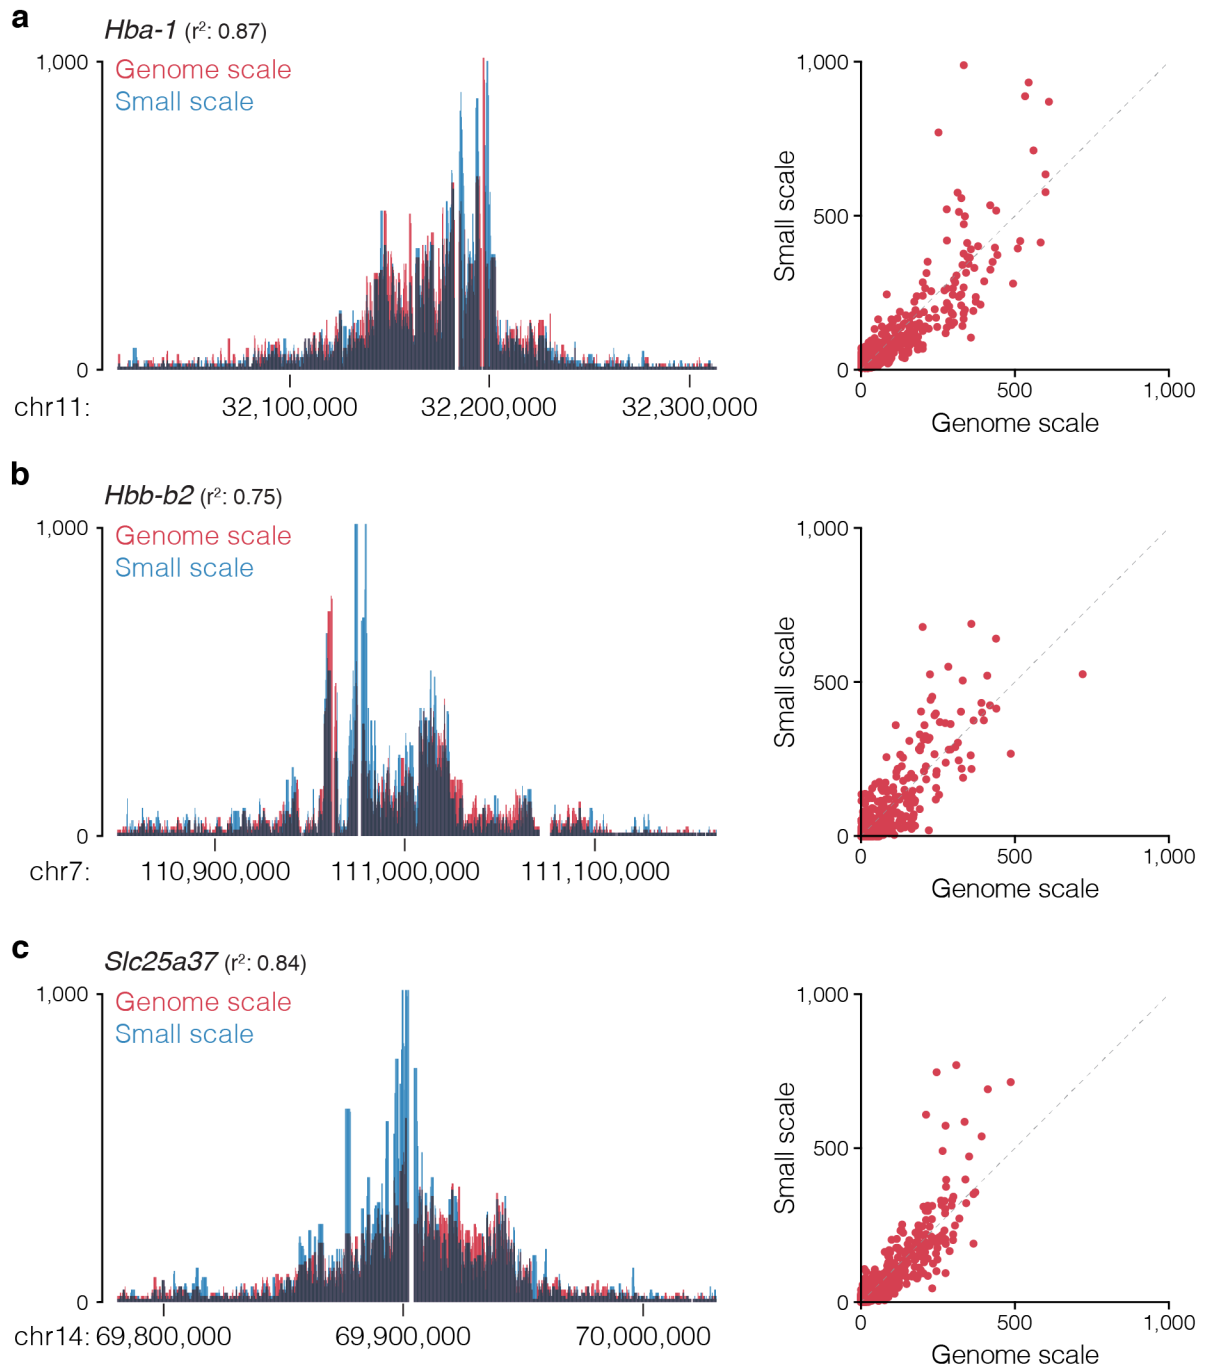

730  
731

732 **Supp. Fig. 9 | Genome scale capture closely matches designs with fewer probes.**  
733 Overlaid 3C profiles, Pearson correlation values, and per fragment count correlation plots for  
734 the *Hba-1* (a), *Hbb-b2* (b) and *Slc25a37* (c) promoters in mouse erythroid cells when targeting  
735 <10 (small scale) or >7000 (genome scale) viewpoints with NuTi Capture-C. Note overlaid track  
736 go dark where signals overlap, seven values >1,000 not shown.

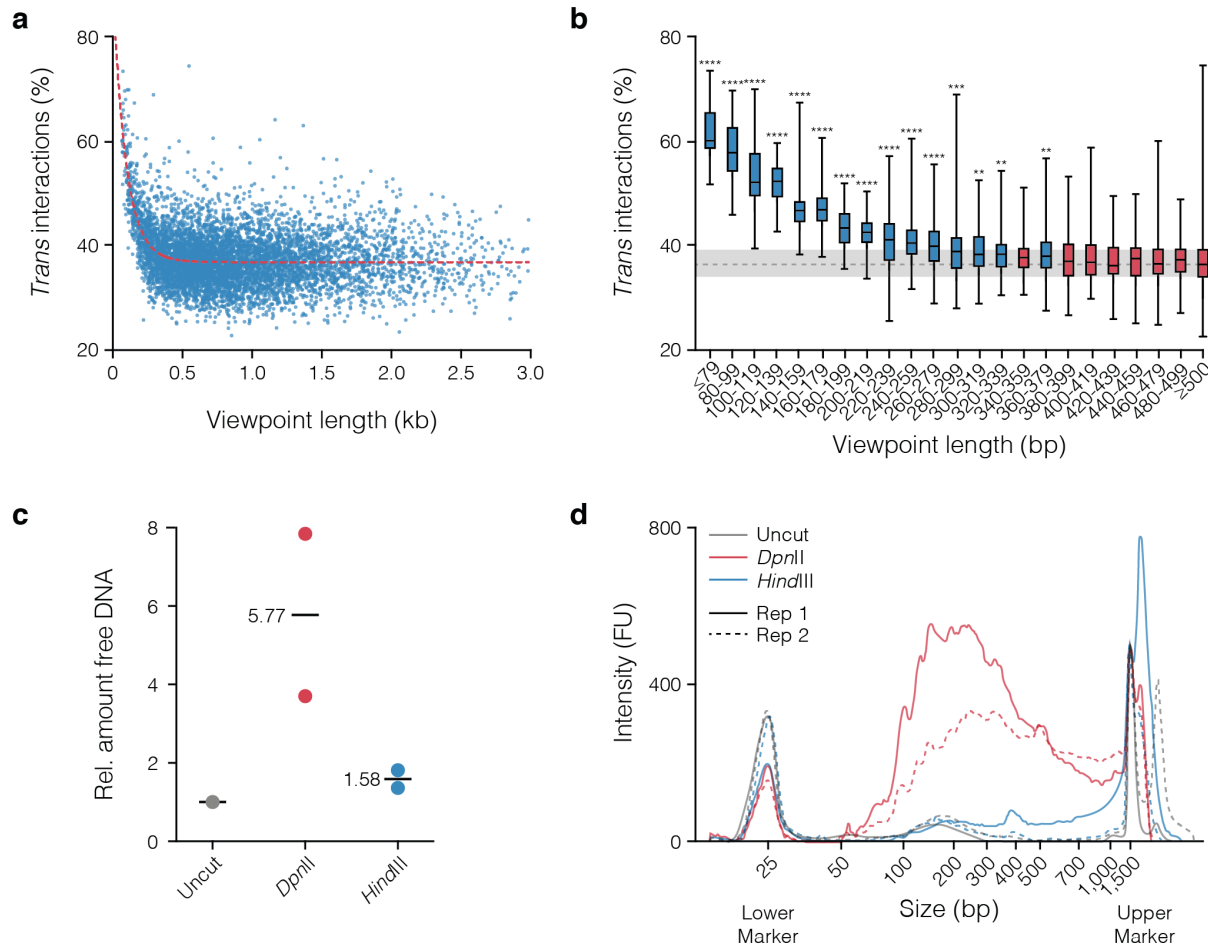

737  
738

739 **Supp. Fig. 10 | Short fragments have higher levels of *trans* interactions.** **a**, Plot of mean  
740 percent of *trans* interactions (n=3) for all viewpoints shorter than 3 kb (n=6,659). Red line  
741 shows a non-linear fit to the data ( $r^2=0.2150$ , d.f. 19,972). **b**, Box and whisker plot of viewpoints  
742 shorter than 500 bp in 20bp bins (n $\geq$ 12). A one-way ANOVA was carried out with multiple  
743 comparisons for each bin against all viewpoints over 500 bp (n=5,017). Significantly different  
744 bins identified by a Dunnett's multiple comparisons test are coloured blue (\*\*p<0.005,  
745 \*\*\*p<0.0005, \*\*\*\*p<0.0001). Relative amount (**c**) and D1000 tapestation profile (**d**) of DNA  
746 recovered from the soluble (non-nuclear) fractions of two 3C samples divided across three  
747 tubes each and digested overnight with no enzyme (Uncut), a 4-bp cutter (*DpnII*), and a 6-bp  
748 cutter (*HindIII*). FU: Fluorescent units.

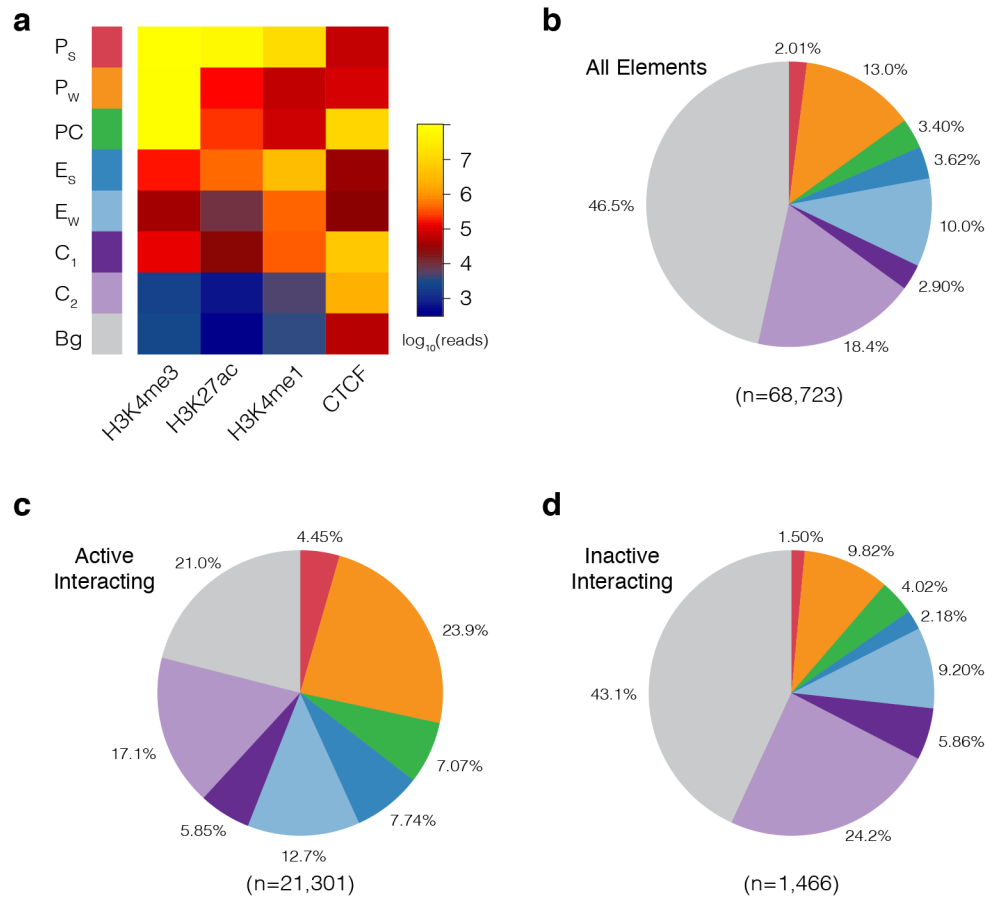

749  
750

751 **Supp. Fig. 11 | GenoSTAN annotation of the mouse genome in erythroid cells. a,**  
 752 Following curation for similar signal profiles, the GenoSTAN Hidden Markov Model identified  
 753 eight states for 1 kb erythroid open chromatin regions using ChIP-seq for marks associated  
 754 with promoters (H3K4me3), active transcription (H3K27ac), enhancers (H3K4me1), and  
 755 boundaries (CTCF). Identified states were named based on average chromatin profile (shown)  
 756 as:  $P_s$ : Promoter (Strong H3K27ac),  $P_w$ : Promoter (Weak H3K27ac), PC: Promoter/CTCF,  $E_s$ :  
 757 Enhancer (Strong H3K27ac),  $E_w$ : Enhancer (Weak H3K27ac),  $C_1$ : CTCF near  
 758 promoter/enhancer,  $C_2$ : CTCF, Bg: Background. Pie charts showing the proportion of unique  
 759 annotations for all open chromatin regions (**b**), fragments significantly interacting with active  
 760 promoters (**c**), and fragments significantly interacting with inactive promoters (**d**). Pie chart  
 761 colours and order match the key in panel a.

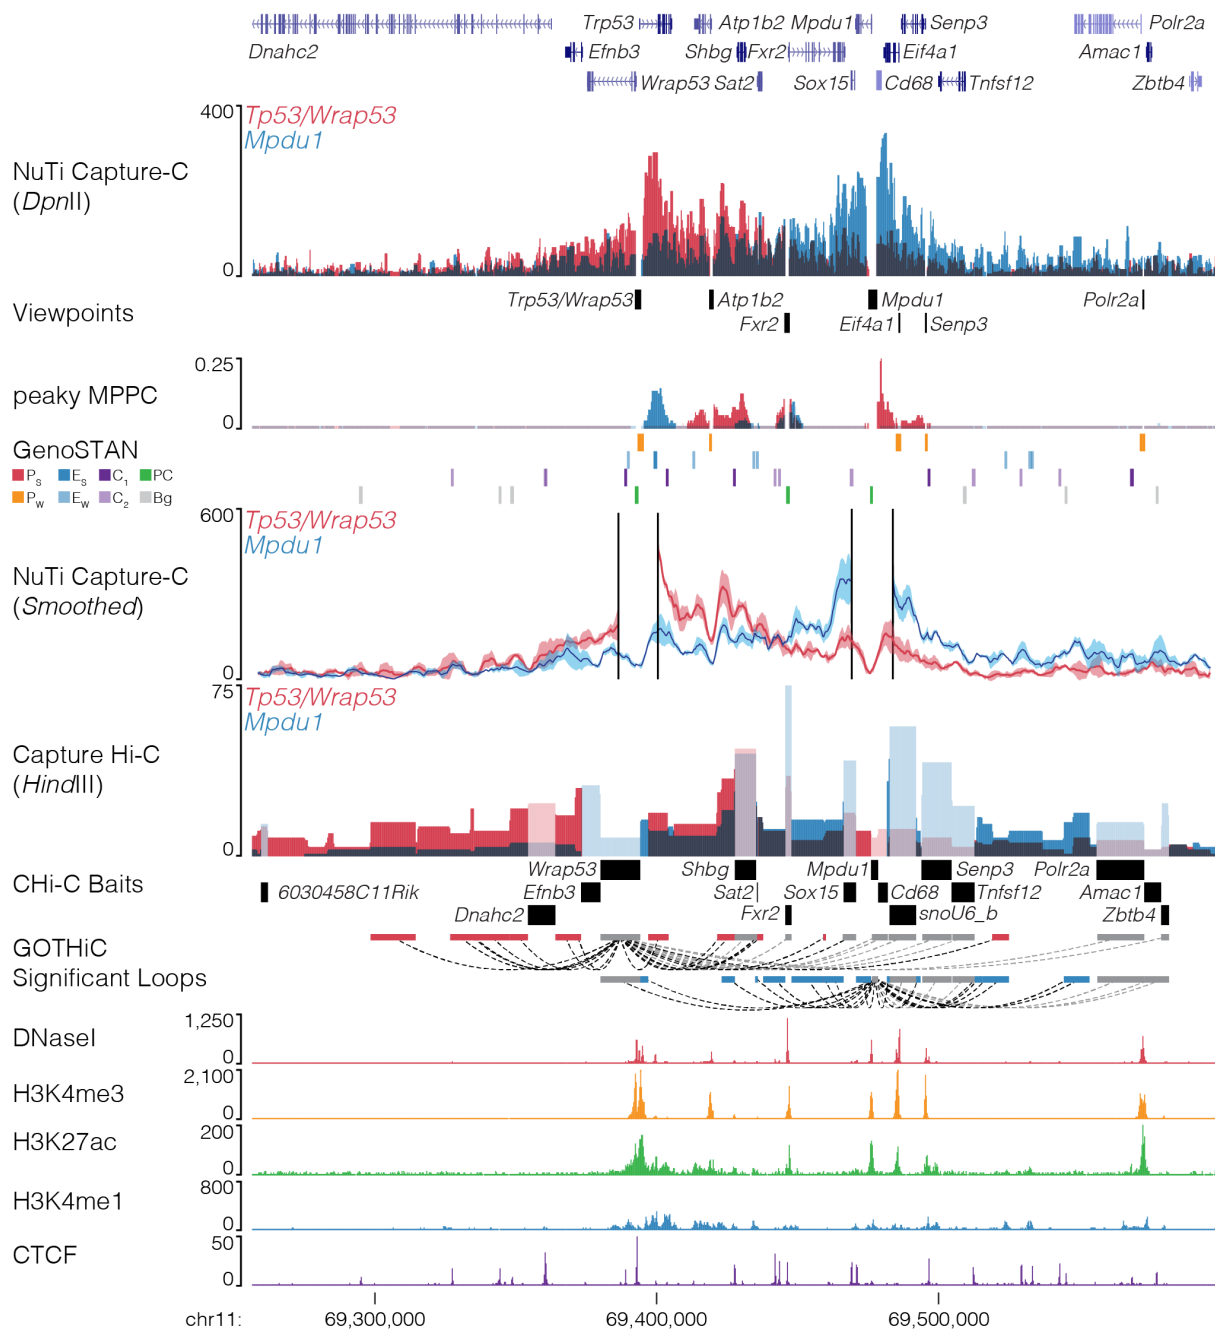

762

763

764 **Supp. Fig. 12 | NuTi Capture-C from the *Tp53*, *Wrap53* and *Mpdu1* promoters.** Sequence  
 765 tracks showing the difference between high-resolution 3C (*DpnII*, NuTi Capture-C) and low-  
 766 resolution 3C (*HindIII*, Capture Hi-C) at gene promoters in the same regulatory domain in  
 767 erythroid cells (mm9, chr11:69,256,536-69,598,480). Tracks in order: UCSC gene annotation,  
 768 *cis*-normalized mean interactions per *DpnII* fragment using NuTi Capture-C (n=3), NuTi  
 769 Capture-C viewpoints, peaky Marginal Posterior Probability of Contact (MPPC) scores with  
 770 fragments with MPPC  $\geq 0.01$  darker, GenoSTAN open chromatin classification, windowed  
 771 mean interactions using NuTi Capture-C, total supporting reads per *HindIII* fragment with CHi-  
 772 C (n=2; co-targeted fragments are lighter in colour), CHi-C bait fragments, loops between  
 773 reported significantly interacting fragments (co-targeting loops are coloured grey), erythroid  
 774 tracks for open chromatin (DNaseI), promoters (H3K4me3), active transcription (H3K27ac),  
 775 enhancers (H3K4me1), and boundaries (CTCF). Note overlapping blue and red signals  
 776 appear darker in colour (NuTi Capture-C, peaky MPPC, CHi-C).

777

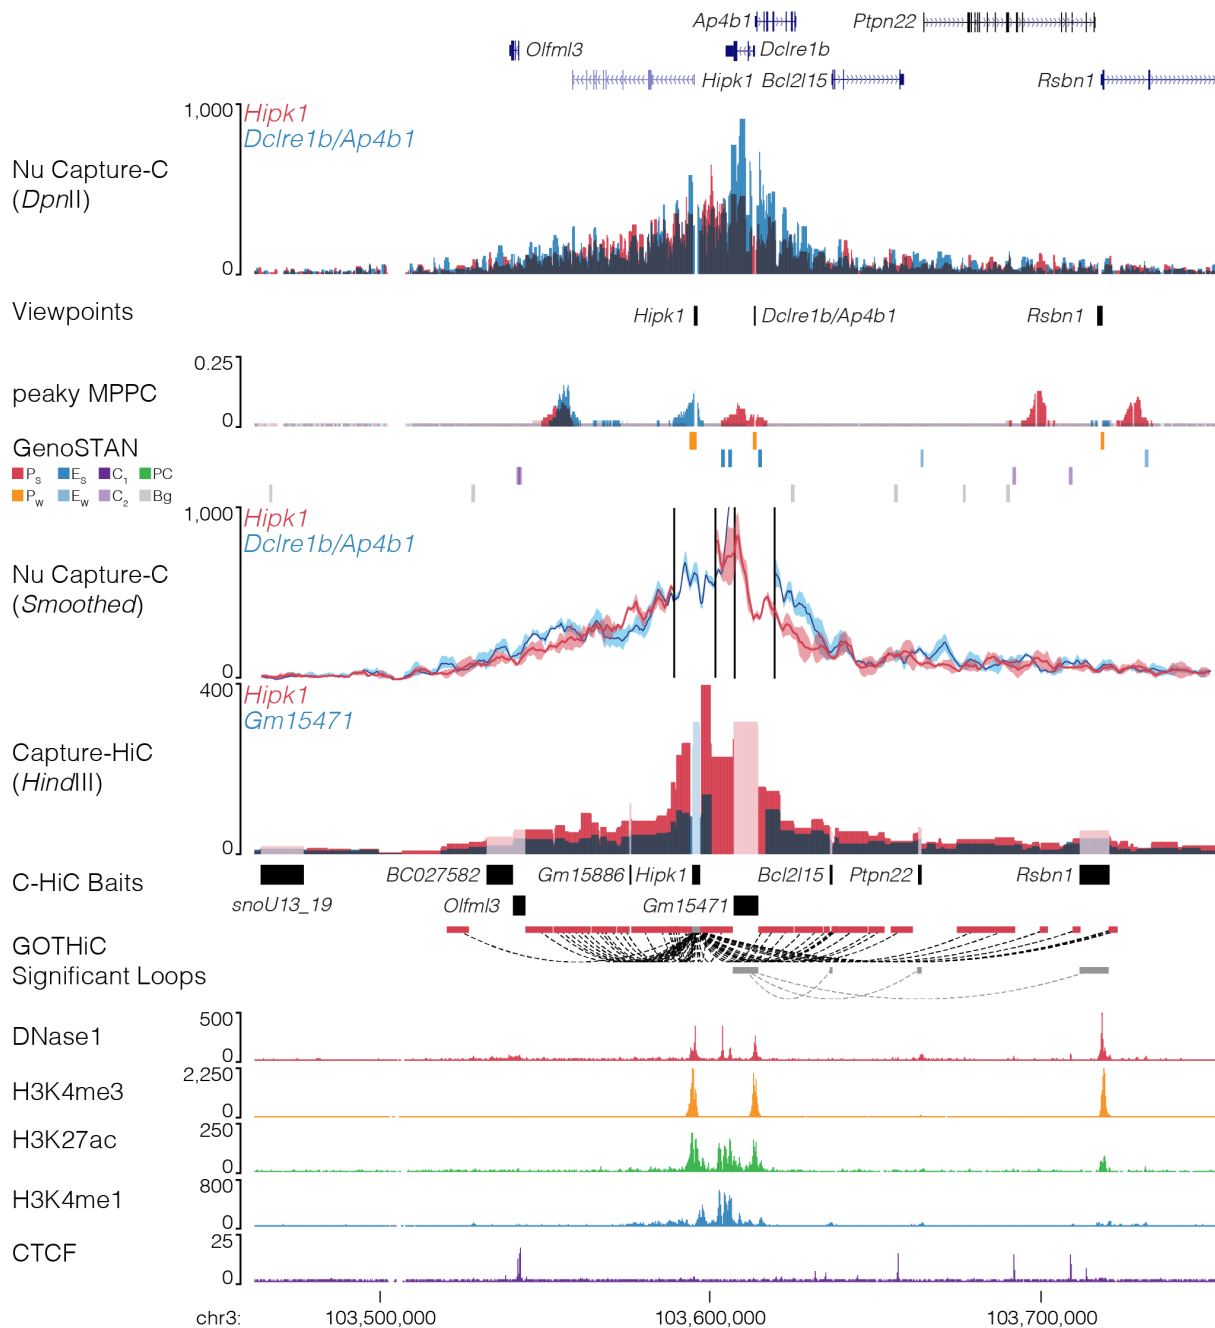

778  
779

780 **Fig. 13 | NuTi Capture-C from the *Hipk1*, *Dclre1b* and *Ap4b1* promoters.** Sequence tracks  
781 showing the difference between high-resolution 3C (*DpnII*, NuTi Capture-C) and low-  
782 resolution 3C (*HindIII*, Capture Hi-C) at gene promoters in the same regulatory domain in  
783 erythroid cells (mm9, chr3:103,462,115-103,753,122). Tracks in order: UCSC gene  
784 annotation, *cis*-normalized mean interactions per *DpnII* fragment using NuTi Capture-C (n=3),  
785 NuTi Capture-C viewpoints, peaky Marginal Posterior Probability of Contact (MPPC) scores  
786 with fragments with MPPC  $\geq 0.01$  darker, GenoSTAN open chromatin classification, windowed  
787 mean interactions using NuTi Capture-C, total supporting reads per *HindIII* fragment with CHI-  
788 C (n=2; co-targeted fragments are lighter in colour), CHi-C bait fragments, loops between  
789 reported significantly interacting fragments (co-targeting loops are coloured grey), erythroid  
790 tracks for open chromatin (DNase1), promoters (H3K4me3), active transcription (H3K27ac),  
791 enhancers (H3K4me1), and boundaries (CTCF). Note overlapping blue and red signals  
792 appear darker in colour (NuTi Capture-C, peaky MPPC, CHi-C).

793

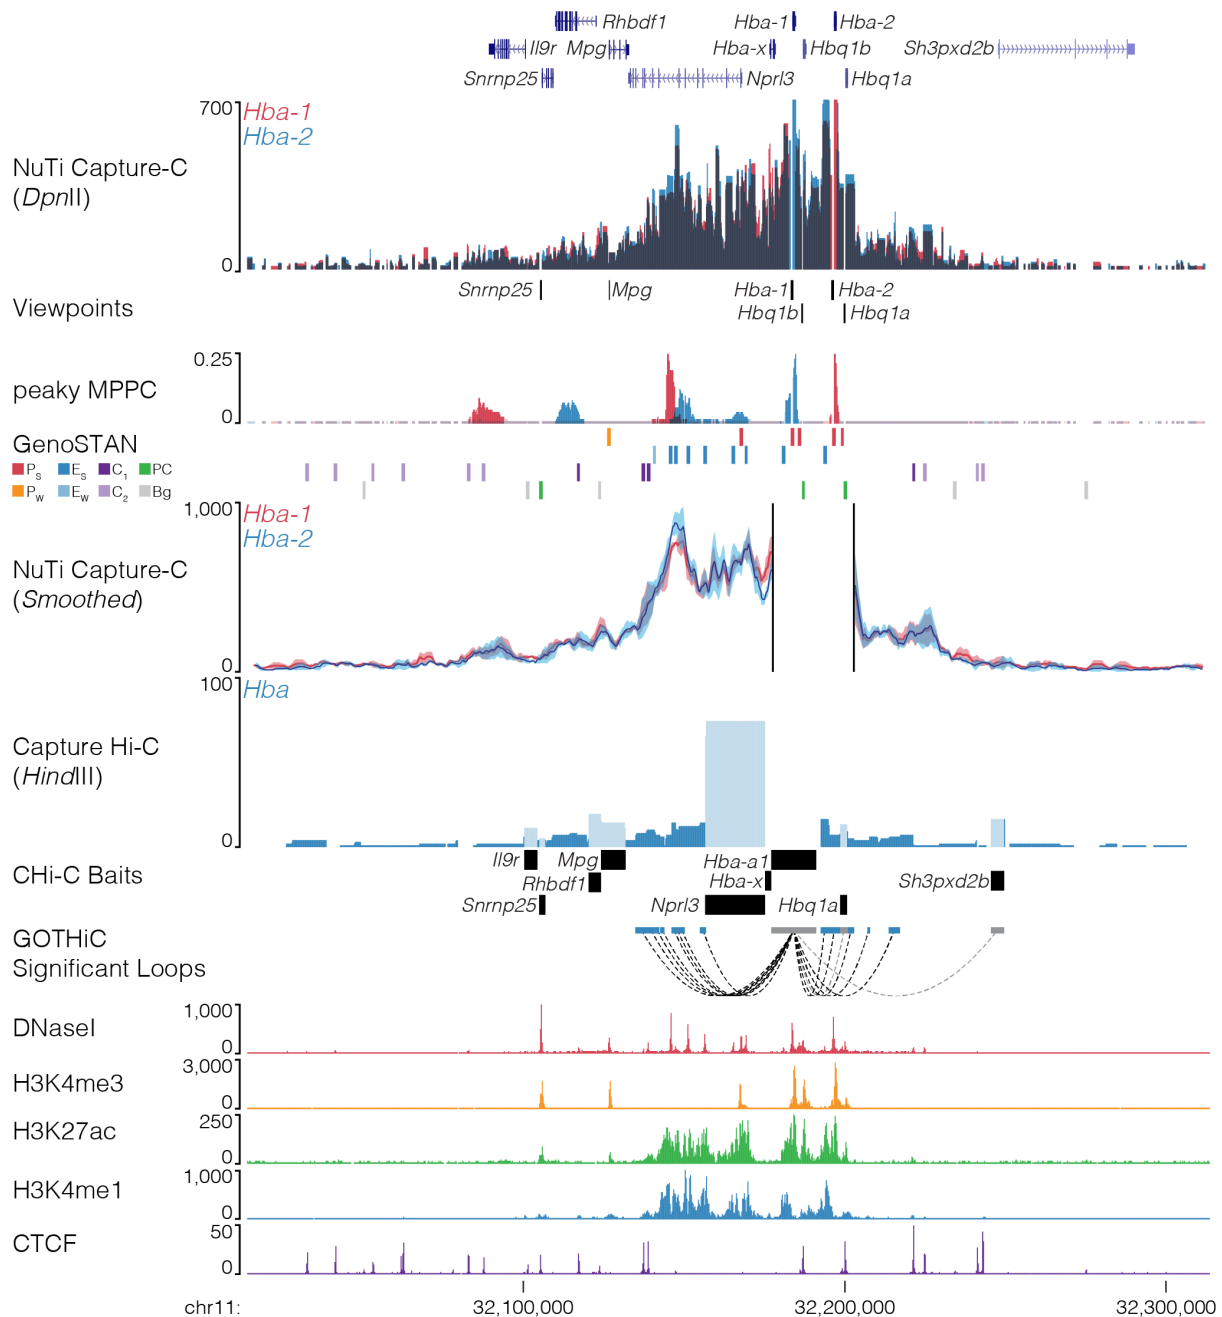

794

795

796 **Fig. 14 | NuTi Capture-C from the *Hba-1* and *Hba-2* promoters.** Sequence tracks showing  
 797 the difference between high-resolution 3C (*DpnII*, NuTi Capture-C) and low-resolution 3C  
 798 (*HindIII*, Capture Hi-C) at gene promoters in the same regulatory domain in erythroid cells  
 799 (mm9, chr3:103,462,115-103,753,122). Tracks in order: UCSC gene annotation, *cis*-  
 800 normalized mean interactions per *DpnII* fragment using NuTi Capture-C (n=3), NuTi Capture-  
 801 C viewpoints, peaky Marginal Posterior Probability of Contact (MPPC) scores with fragments  
 802 with MPPC  $\geq 0.01$  darker, GenoSTAN open chromatin classification, windowed mean  
 803 interactions using NuTi Capture-C, total supporting reads per *HindIII* fragment with CHi-C  
 804 (n=2; co-targeted fragments are lighter in colour), CHi-C bait fragments, loops between  
 805 reported significantly interacting fragments (co-targeting loops are coloured grey), erythroid  
 806 tracks for open chromatin (DNaseI), promoters (H3K4me3), active transcription (H3K27ac),  
 807 enhancers (H3K4me1), and boundaries (CTCF). Note overlapping blue and red signals  
 808 appear darker in colour (NuTi Capture-C, peaky MPPC, CHi-C).

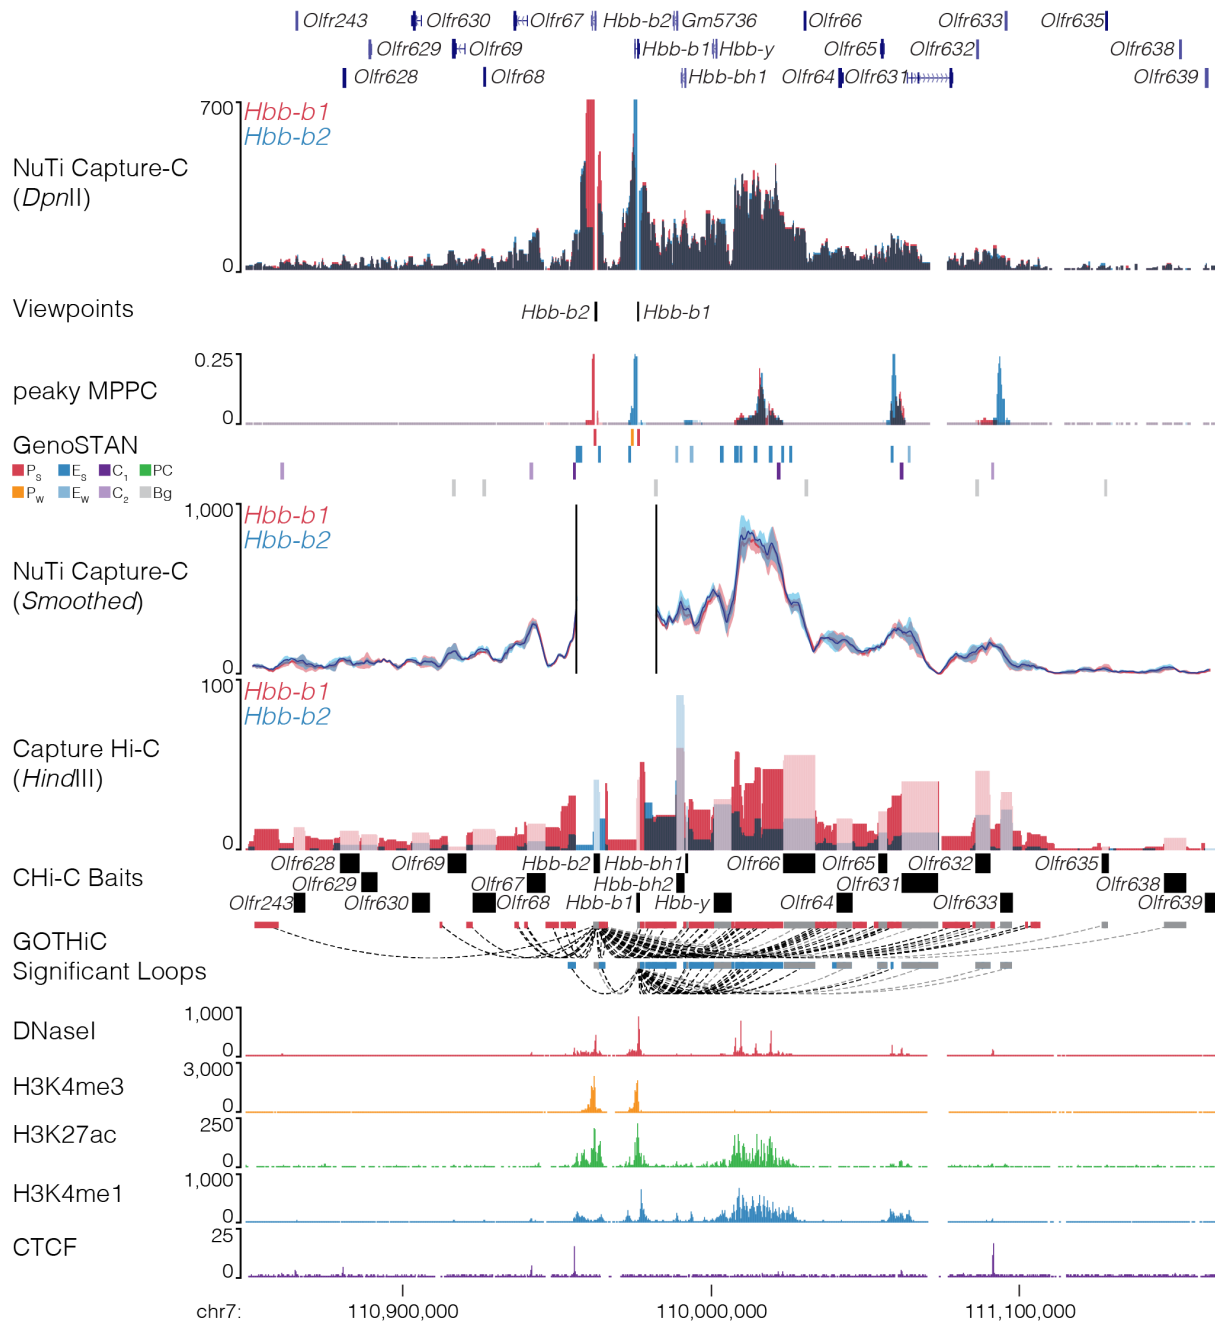

809  
810

811 **Fig. 15 | NuTi Capture-C from the *Hbb-b1* and *Hbb-b2* promoters.** Sequence tracks  
812 showing the difference between high-resolution 3C (*DpnII*, NuTi Capture-C) and low-  
813 resolution 3C (*HindIII*, Capture Hi-C) at gene promoters in the same regulatory domain in  
814 erythroid cells (mm9, chr7:110,848,909-111,163,908). Tracks in order: UCSC gene  
815 annotation, *cis*-normalized mean interactions per *DpnII* fragment using NuTi Capture-C (n=3),  
816 NuTi Capture-C viewpoints, peaky Marginal Posterior Probability of Contact (MPPC) scores  
817 with fragments with MPPC  $\geq 0.01$  darker, GenoSTAN open chromatin classification, windowed  
818 mean interactions using NuTi Capture-C, total supporting reads per *HindIII* fragment with CHi-  
819 C (n=2; co-targeted fragments are lighter in colour), CHi-C bait fragments, loops between  
820 reported significantly interacting fragments (co-targeting loops are coloured grey), erythroid  
821 tracks for open chromatin (DNaseI), promoters (H3K4me3), active transcription (H3K27ac),  
822 enhancers (H3K4me1), and boundaries (CTCF). Note overlapping blue and red signals  
823 appear darker in colour (NuTi Capture-C, peaky MPPC, CHi-C).

824

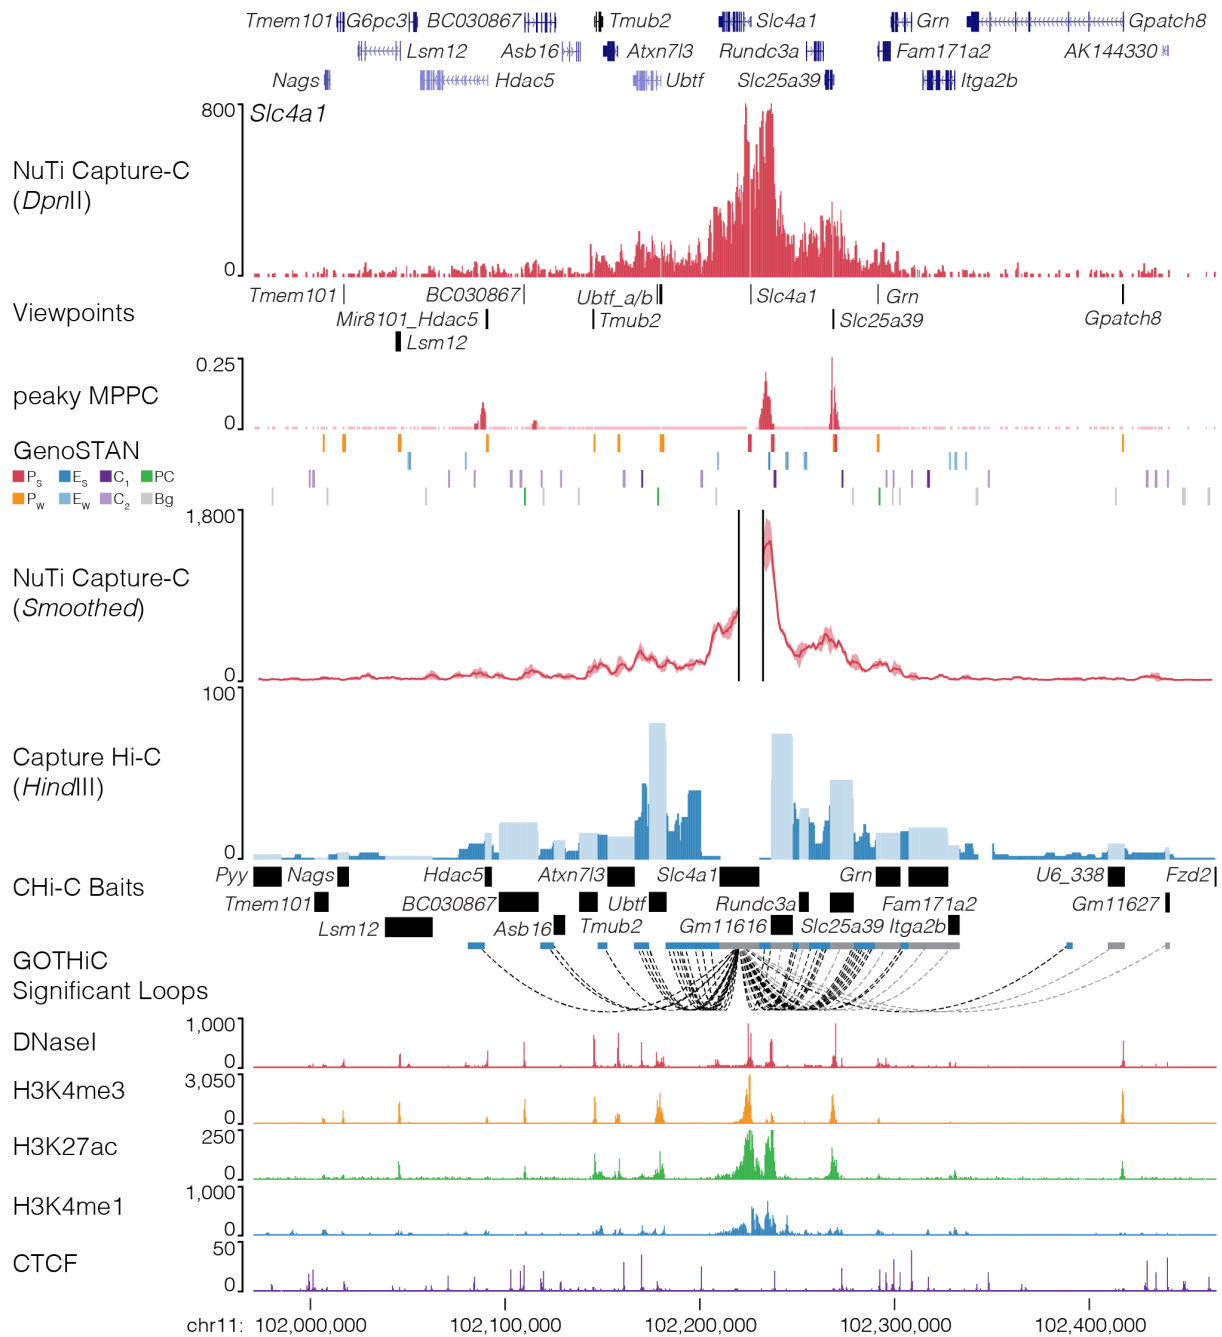

825  
826

827 **Fig. 16 | NuTi Capture-C from the *Slc4a1* promoter.** Sequence tracks showing the  
828 difference between high-resolution 3C (*DpnII*, NuTi Capture-C) and low-resolution 3C (*HindIII*,  
829 Capture Hi-C) at calling interacting fragments (mm9, chr11:101,971,435-102,465,294) in  
830 erythroid cells. Tracks in order: UCSC gene annotation, *cis*-normalized mean interactions per  
831 *DpnII* fragment using NuTi Capture-C (n=3), NuTi Capture-C viewpoints, peaky Marginal  
832 Posterior Probability of Contact (MPPC) scores with fragments with MPPC  $\geq 0.01$  darker,  
833 GenoSTAN open chromatin classification, windowed mean interactions using NuTi Capture-  
834 C, total supporting reads per *HindIII* fragment with CHi-C (n=2; co-targeted fragments are  
835 lighter in colour), CHi-C bait fragments, loops between reported significantly interacting  
836 fragments (co-targeting loops are coloured grey), erythroid tracks for open chromatin  
837 (DNaseI), promoters (H3K4me3), active transcription (H3K27ac), enhancers (H3K4me1), and  
838 boundaries (CTCF). Note overlapping MPPC signals appear darker in colour.



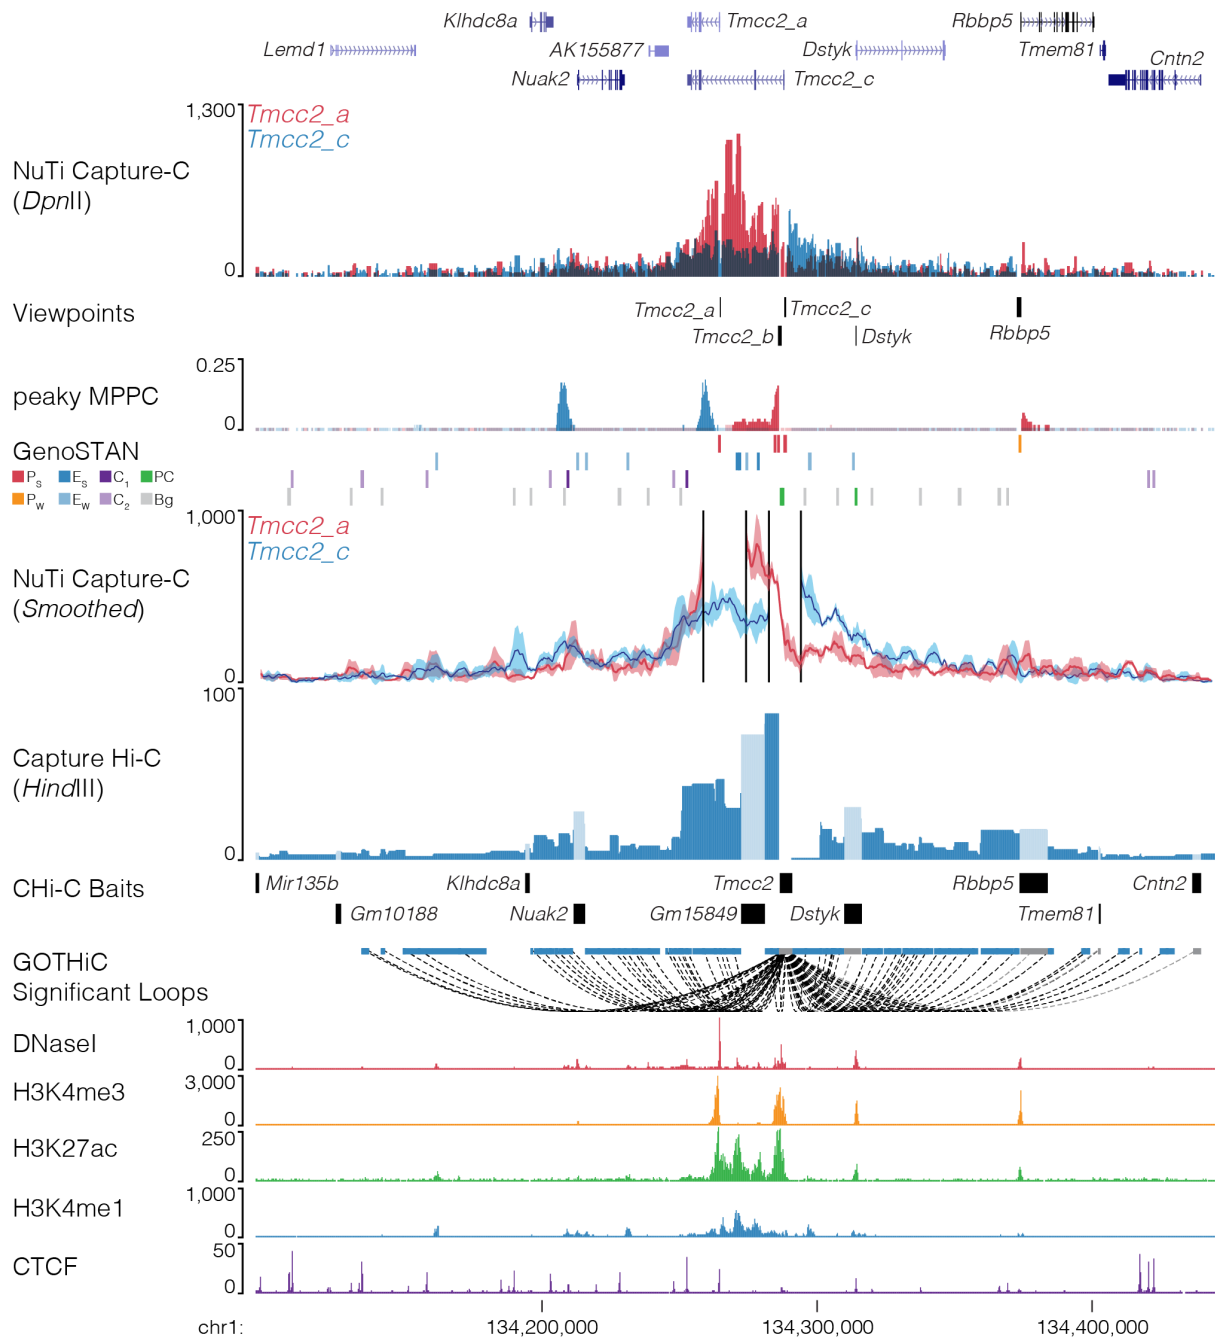

839  
840

841 **Fig. 17 | NuTi Capture-C from alternative *Tmcc2* promoters.** Sequence tracks showing the  
842 difference between high-resolution 3C (*DpnII*, NuTi Capture-C) and low-resolution 3C (*HindIII*,  
843 Capture Hi-C) from alternative *Tmcc2* promoters (mm9, chr1:134,095,540-134,445,539) in  
844 erythroid cells. Tracks in order: UCSC gene annotation, *cis*-normalized mean interactions per  
845 *DpnII* fragment using NuTi Capture-C (n=3), NuTi Capture-C viewpoints, peaky Marginal  
846 Posterior Probability of Contact (MPPC) scores with fragments with MPPC  $\geq 0.01$  darker,  
847 GenoSTAN open chromatin classification, windowed mean interactions using NuTi Capture-  
848 C, total supporting reads per *HindIII* fragment with CHi-C (n=2; co-targeted fragments are  
849 lighter in colour), CHi-C bait fragments, loops between reported significantly interacting  
850 fragments (co-targeting loops are coloured grey), erythroid tracks for open chromatin  
851 (DNaseI), promoters (H3K4me3), active transcription (H3K27ac), enhancers (H3K4me1), and  
852 boundaries (CTCF). Note overlapping blue and red signals appear darker in colour (NuTi  
853 Capture-C, peaky MPPC, CHi-C).

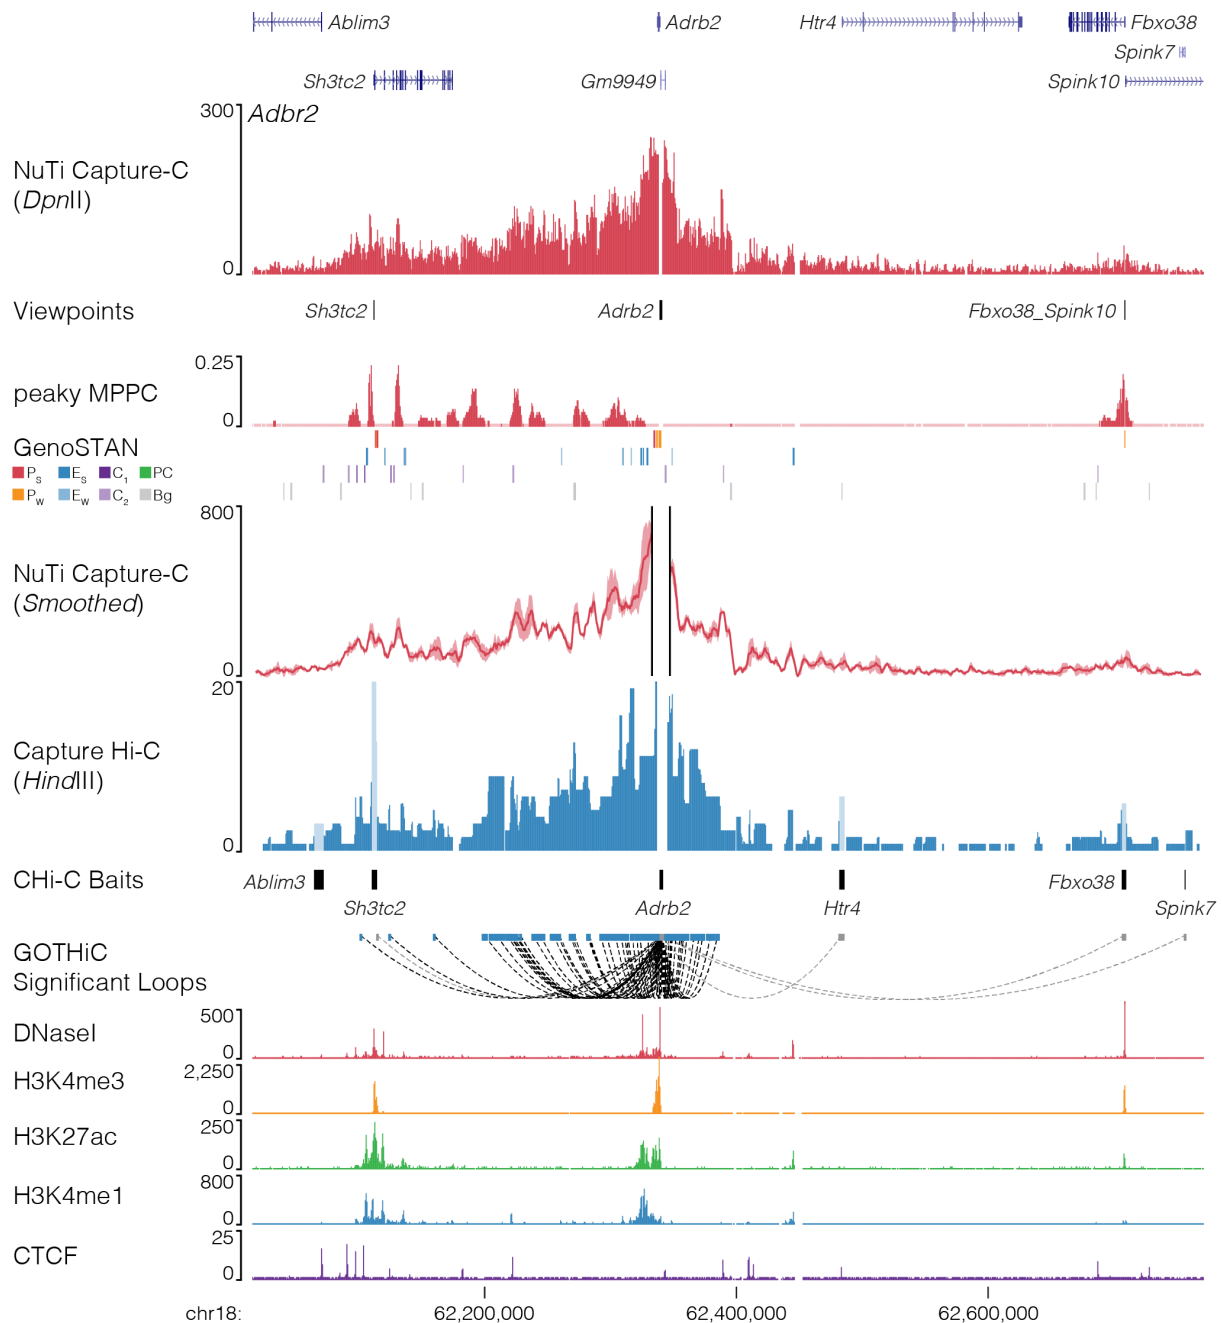

854  
855

856 **Fig. 18 | NuTi Capture-C from the *Adrb2* promoter.** Sequence tracks showing the difference  
857 between high-resolution 3C (*DpnII*, NuTi Capture-C) and low-resolution 3C (*HindIII*, Capture  
858 Hi-C) at calling interacting fragments (mm9, chr18:62,016,212-62,771,180) in erythroid cells.  
859 Tracks in order: UCSC gene annotation, *cis*-normalized mean interactions per *DpnII* fragment  
860 using NuTi Capture-C (n=3), NuTi Capture-C viewpoints, peaky Marginal Posterior Probability  
861 of Contact (MPPC) scores with fragments with MPPC  $\geq 0.01$  darker, GenoSTAN open  
862 chromatin classification, windowed mean interactions using NuTi Capture-C, total supporting  
863 reads per *HindIII* fragment with CHi-C (n=2; co-targeted fragments are lighter in colour), CHi-  
864 C bait fragments, loops between reported significantly interacting fragments (co-targeting  
865 loops are coloured grey), erythroid tracks for open chromatin (DNaseI), promoters  
866 (H3K4me3), active transcription (H3K27ac), enhancers (H3K4me1), and boundaries (CTCF).  
867 Note overlapping MPPC signals appear darker in colour.

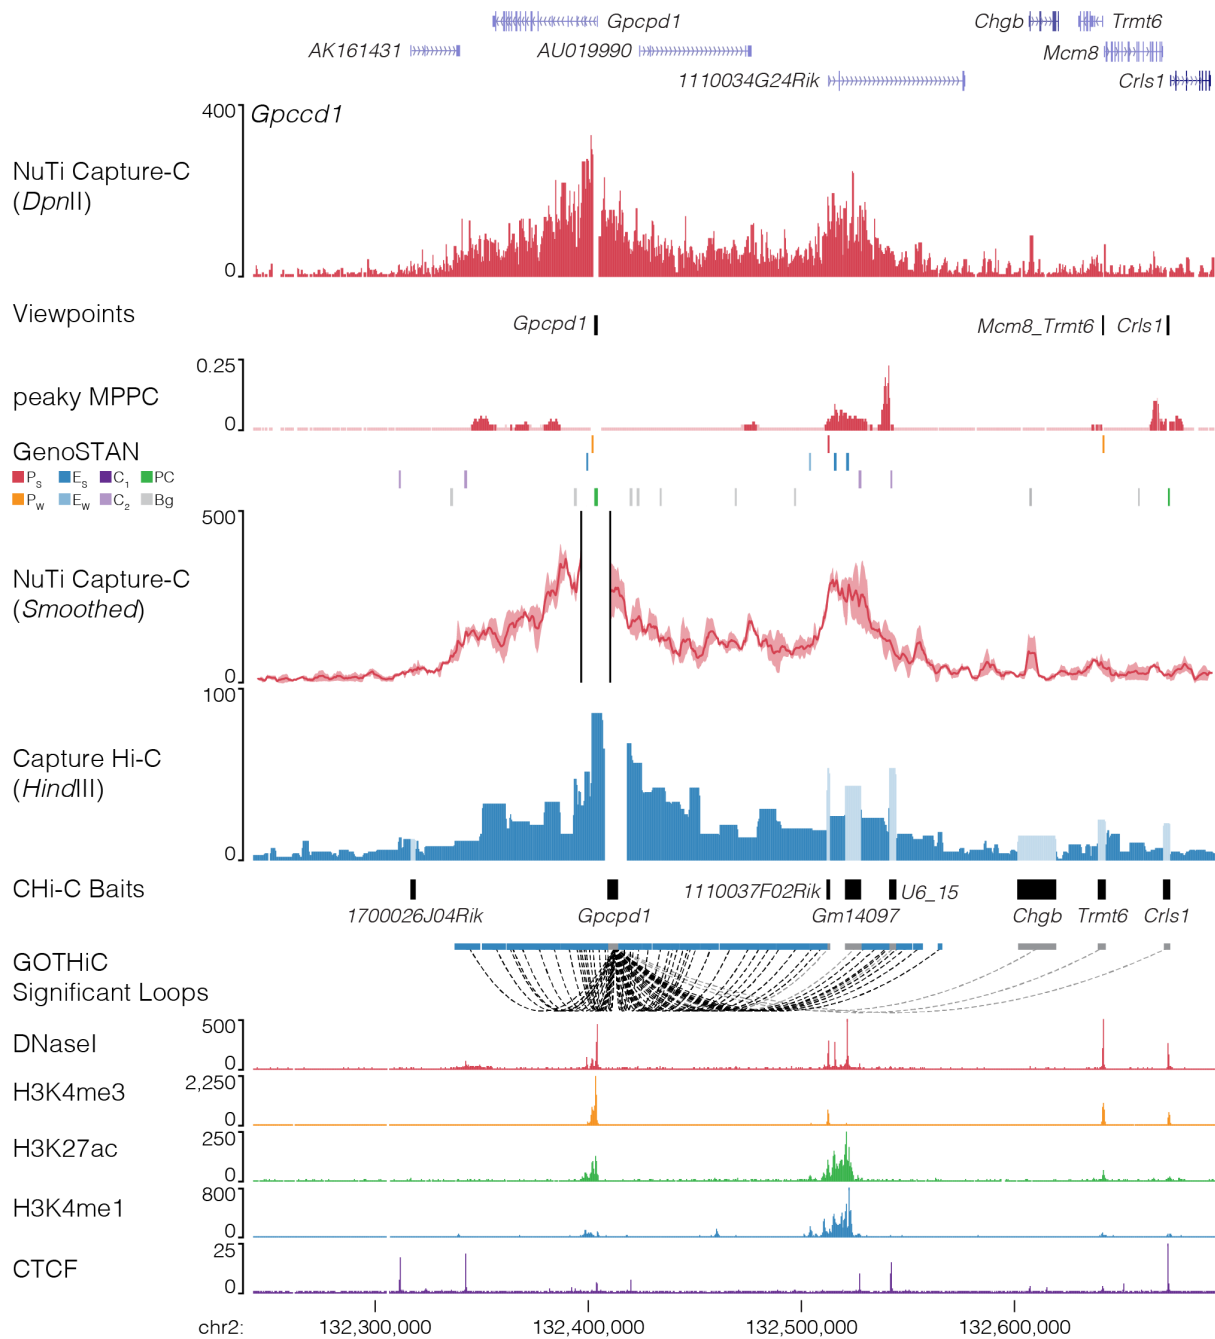

868  
869

870 **Fig. 19 | NuTi Capture-C from the *Gpcpd1* promoters.** Sequence tracks showing the  
871 difference between high-resolution 3C (*DpnII*, NuTi Capture-C) and low-resolution 3C (*HindIII*,  
872 Capture Hi-C) at calling interacting fragments (mm9, chr2:132,242,416-132,695,297) in  
873 erythroid cells. Tracks in order: UCSC gene annotation, *cis*-normalized mean interactions per  
874 *DpnII* fragment using NuTi Capture-C (n=3), NuTi Capture-C viewpoints, peaky Marginal  
875 Posterior Probability of Contact (MPPC) scores with fragments with MPPC  $\geq 0.01$  darker,  
876 GenoSTAN open chromatin classification, windowed mean interactions using NuTi Capture-  
877 C, total supporting reads per *HindIII* fragment with CHi-C (n=2; co-targeted fragments are  
878 lighter in colour), CHi-C bait fragments, loops between reported significantly interacting  
879 fragments (co-targeting loops are coloured grey), erythroid tracks for open chromatin  
880 (DNaseI), promoters (H3K4me3), active transcription (H3K27ac), enhancers (H3K4me1), and  
881 boundaries (CTCF). Note overlapping MPPC signals appear darker in colour.

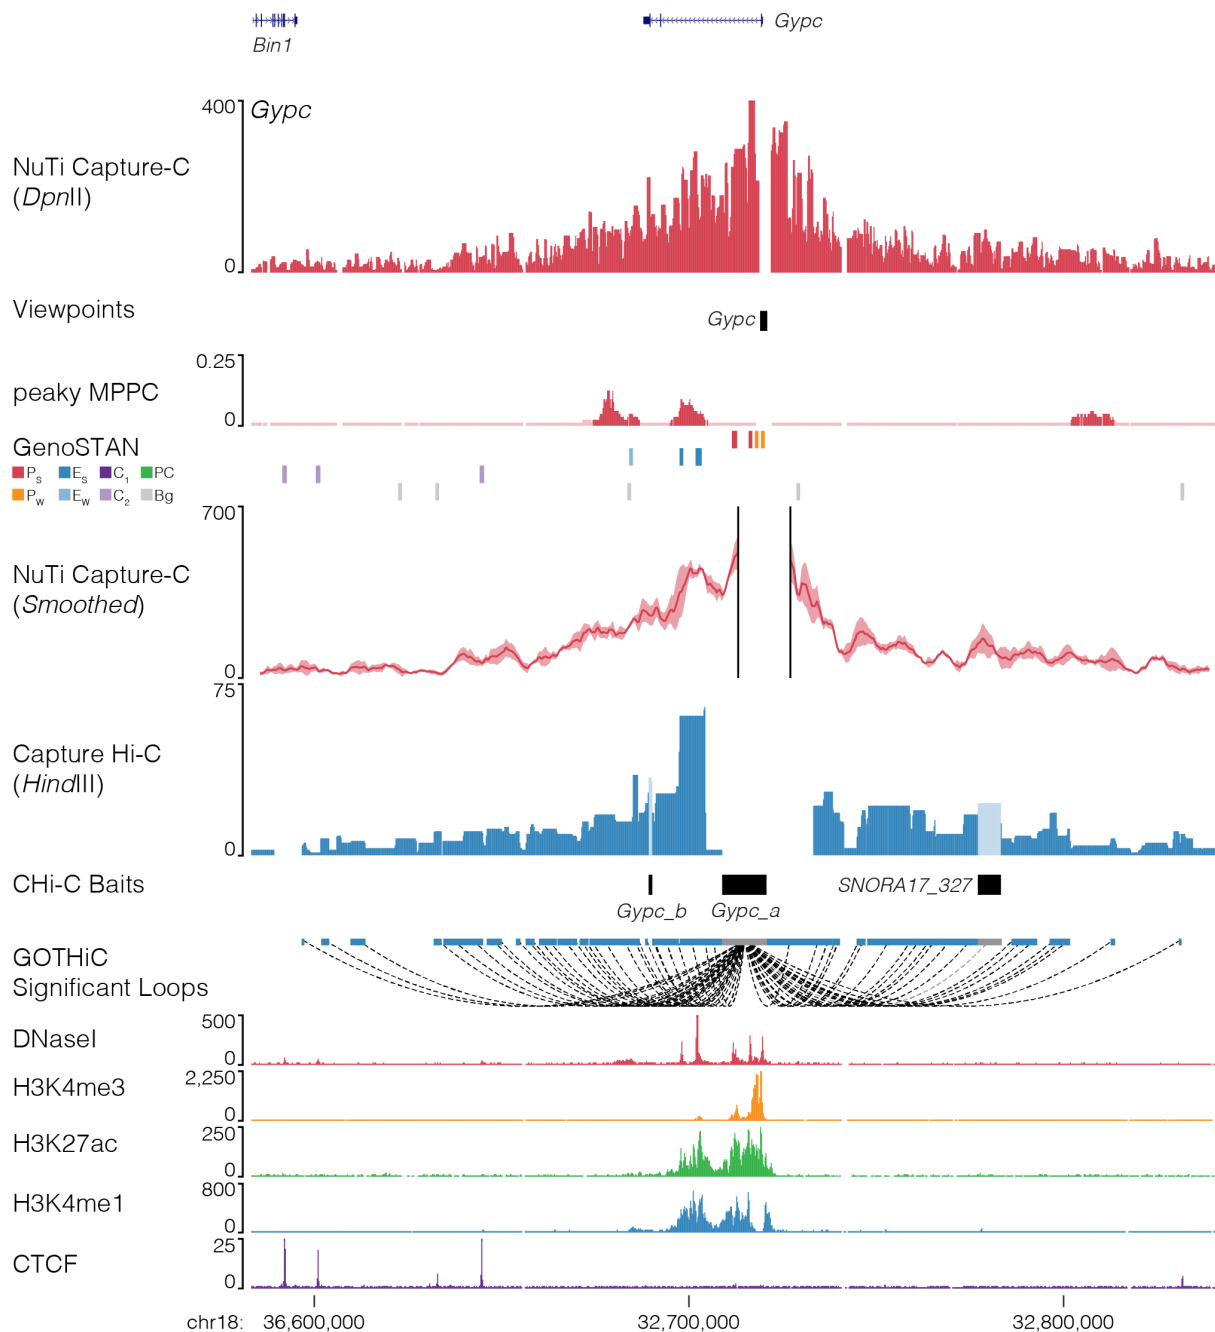

882  
883

884 **Fig. 20 | NuTi Capture-C from the *Gypc* promoter.** Sequence tracks showing the difference  
885 between high-resolution 3C (*DpnII*, NuTi Capture-C) and low-resolution 3C (*HindIII*, Capture  
886 Hi-C) at calling interacting fragments (mm9, chr18:32,583,205-32,841,048) in erythroid cells.  
887 Tracks in order: UCSC gene annotation, *cis*-normalized mean interactions per *DpnII* fragment  
888 using NuTi Capture-C (n=3), NuTi Capture-C viewpoints, peaky Marginal Posterior Probability  
889 of Contact (MPPC) scores with fragments with MPPC  $\geq 0.01$  darker, GenoSTAN open  
890 chromatin classification, windowed mean interactions using NuTi Capture-C, total supporting  
891 reads per *HindIII* fragment with CHi-C (n=2; co-targeted fragments are lighter in colour), CHi-  
892 C bait fragments, loops between reported significantly interacting fragments (co-targeting  
893 loops are coloured grey), erythroid tracks for open chromatin (DNaseI), promoters  
894 (H3K4me3), active transcription (H3K27ac), enhancers (H3K4me1), and boundaries (CTCF).  
895 Note overlapping MPPC signals appear darker in colour.

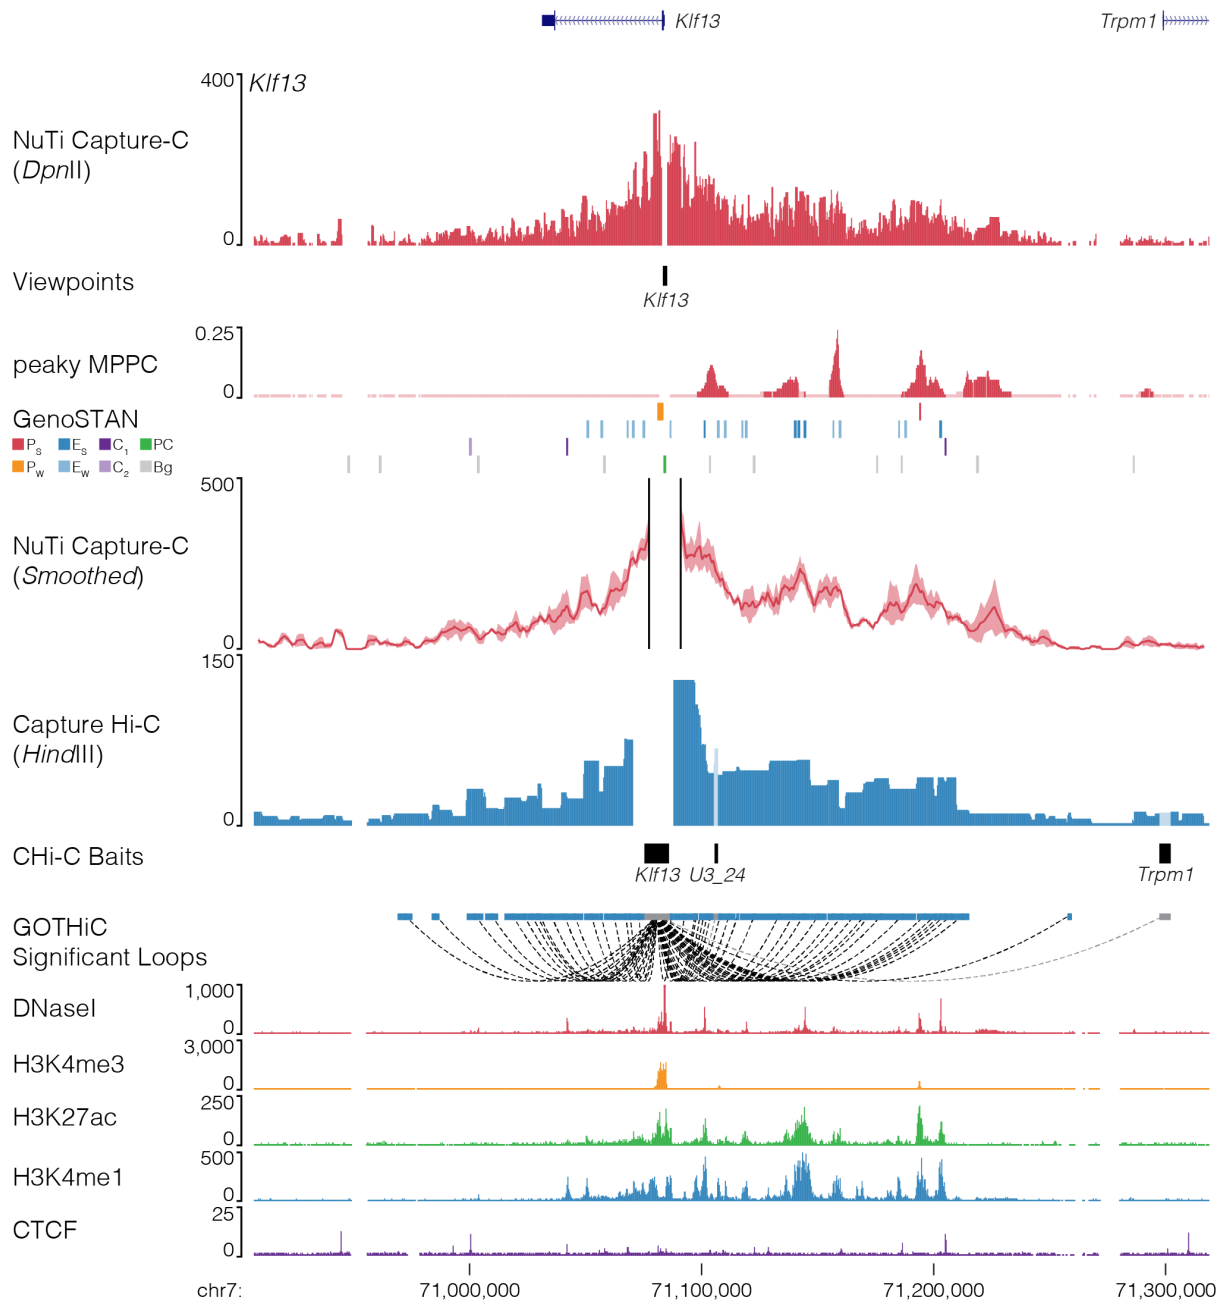

896  
897

898 **Fig. 21 | NuTi Capture-C from the *Klf13* promoters.** Sequence tracks showing the difference  
899 between high-resolution 3C (*DpnII*, NuTi Capture-C) and low-resolution 3C (*HindIII*, Capture  
900 Hi-C) at calling interacting fragments (mm9, chr7:70,906,844-71,318,843) in erythroid cells.  
901 Tracks in order: UCSC gene annotation, *cis*-normalized mean interactions per *DpnII* fragment  
902 using NuTi Capture-C (n=3), NuTi Capture-C viewpoints, peaky Marginal Posterior Probability  
903 of Contact (MPPC) scores with fragments with MPPC  $\geq 0.01$  darker, GenoSTAN open  
904 chromatin classification, windowed mean interactions using NuTi Capture-C, total supporting  
905 reads per *HindIII* fragment with CHi-C (n=2; co-targeted fragments are lighter in colour), CHi-  
906 C bait fragments, loops between reported significantly interacting fragments (co-targeting  
907 loops are coloured grey), erythroid tracks for open chromatin (DNaseI), promoters  
908 (H3K4me3), active transcription (H3K27ac), enhancers (H3K4me1), and boundaries (CTCF).  
909 Note overlapping MPPC signals appear darker in colour.

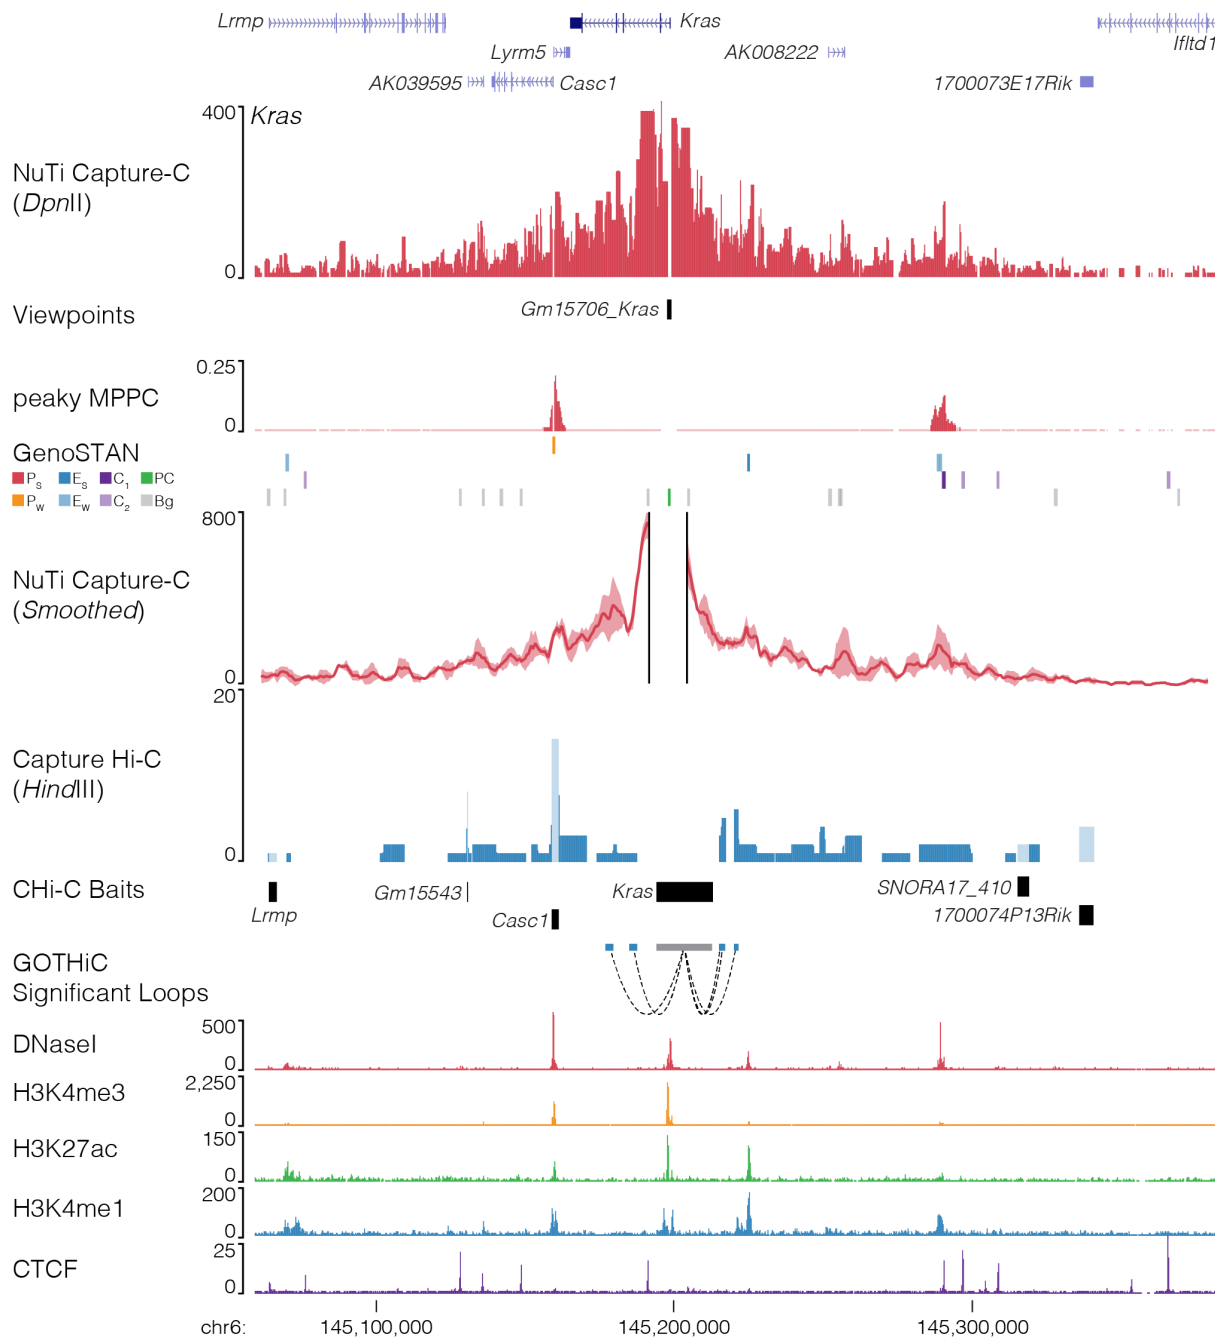

910  
911

912 **Fig. 22 | NuTi Capture-C from the *Kras* promoters** Sequence tracks showing the difference  
 913 between high-resolution 3C (*DpnII*, NuTi Capture-C) and low-resolution 3C (*HindIII*, Capture  
 914 Hi-C) at calling interacting fragments (mm9, chr6:145,059,451-145,381,678) in erythroid cells.  
 915 Tracks in order: UCSC gene annotation, *cis*-normalized mean interactions per *DpnII* fragment  
 916 using NuTi Capture-C (n=3), NuTi Capture-C viewpoints, peaky Marginal Posterior Probability  
 917 of Contact (MPPC) scores with fragments with MPPC  $\geq 0.01$  darker, GenoSTAN open  
 918 chromatin classification, windowed mean interactions using NuTi Capture-C, total supporting  
 919 reads per *HindIII* fragment with CHi-C (n=2; co-targeted fragments are lighter in colour), CHi-  
 920 C bait fragments, loops between reported significantly interacting fragments (co-targeting  
 921 loops are coloured grey), erythroid tracks for open chromatin (DNaseI), promoters  
 922 (H3K4me3), active transcription (H3K27ac), enhancers (H3K4me1), and boundaries (CTCF).  
 923 Note overlapping MPPC signals appear darker in colour.

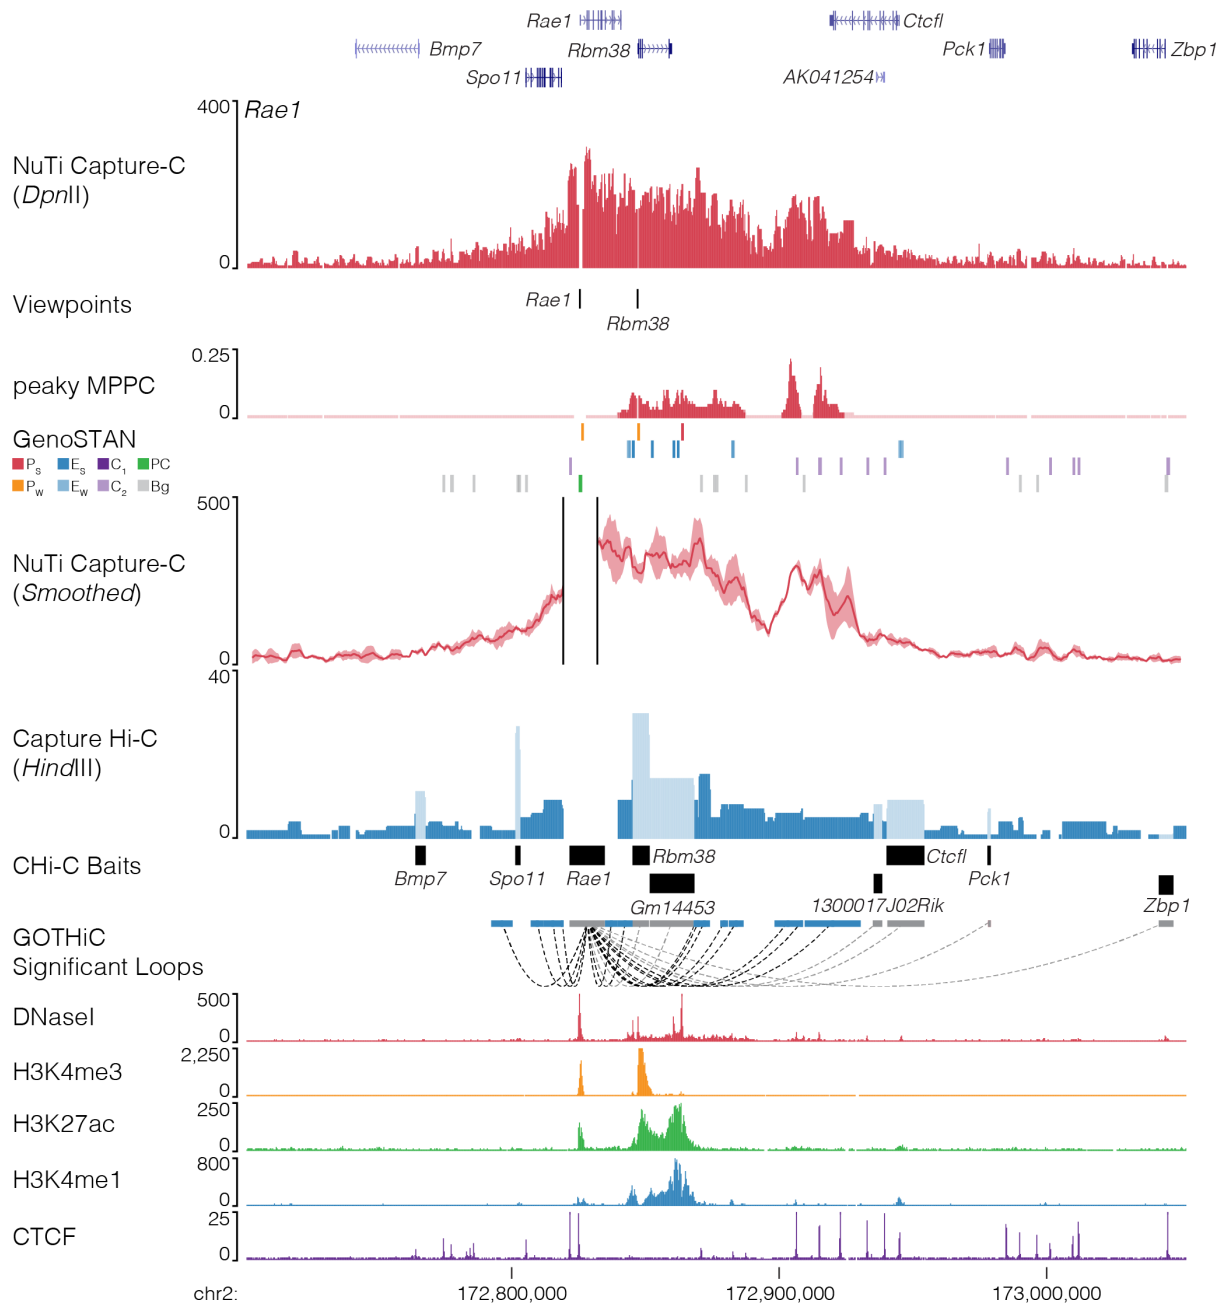

924  
925

926 **Fig. 23 | NuTi Capture-C from the *Rae1* promoter.** Sequence tracks showing the difference  
 927 between high-resolution 3C (*DpnII*, NuTi Capture-C) and low-resolution 3C (*HindIII*, Capture  
 928 Hi-C) at calling interacting fragments (mm9, chr2:172,701,139-173,052,278) in erythroid cells.  
 929 Tracks in order: UCSC gene annotation, *cis*-normalized mean interactions per *DpnII* fragment  
 930 using NuTi Capture-C (n=3), NuTi Capture-C viewpoints, peaky Marginal Posterior Probability  
 931 of Contact (MPPC) scores with fragments with MPPC  $\geq 0.01$  darker, GenoSTAN open  
 932 chromatin classification, windowed mean interactions using NuTi Capture-C, total supporting  
 933 reads per *HindIII* fragment with CHi-C (n=2; co-targeted fragments are lighter in colour), CHi-  
 934 C bait fragments, loops between reported significantly interacting fragments (co-targeting  
 935 loops are coloured grey), erythroid tracks for open chromatin (DNaseI), promoters  
 936 (H3K4me3), active transcription (H3K27ac), enhancers (H3K4me1), and boundaries (CTCF).  
 937 Note overlapping MPPC signals appear darker in colour.

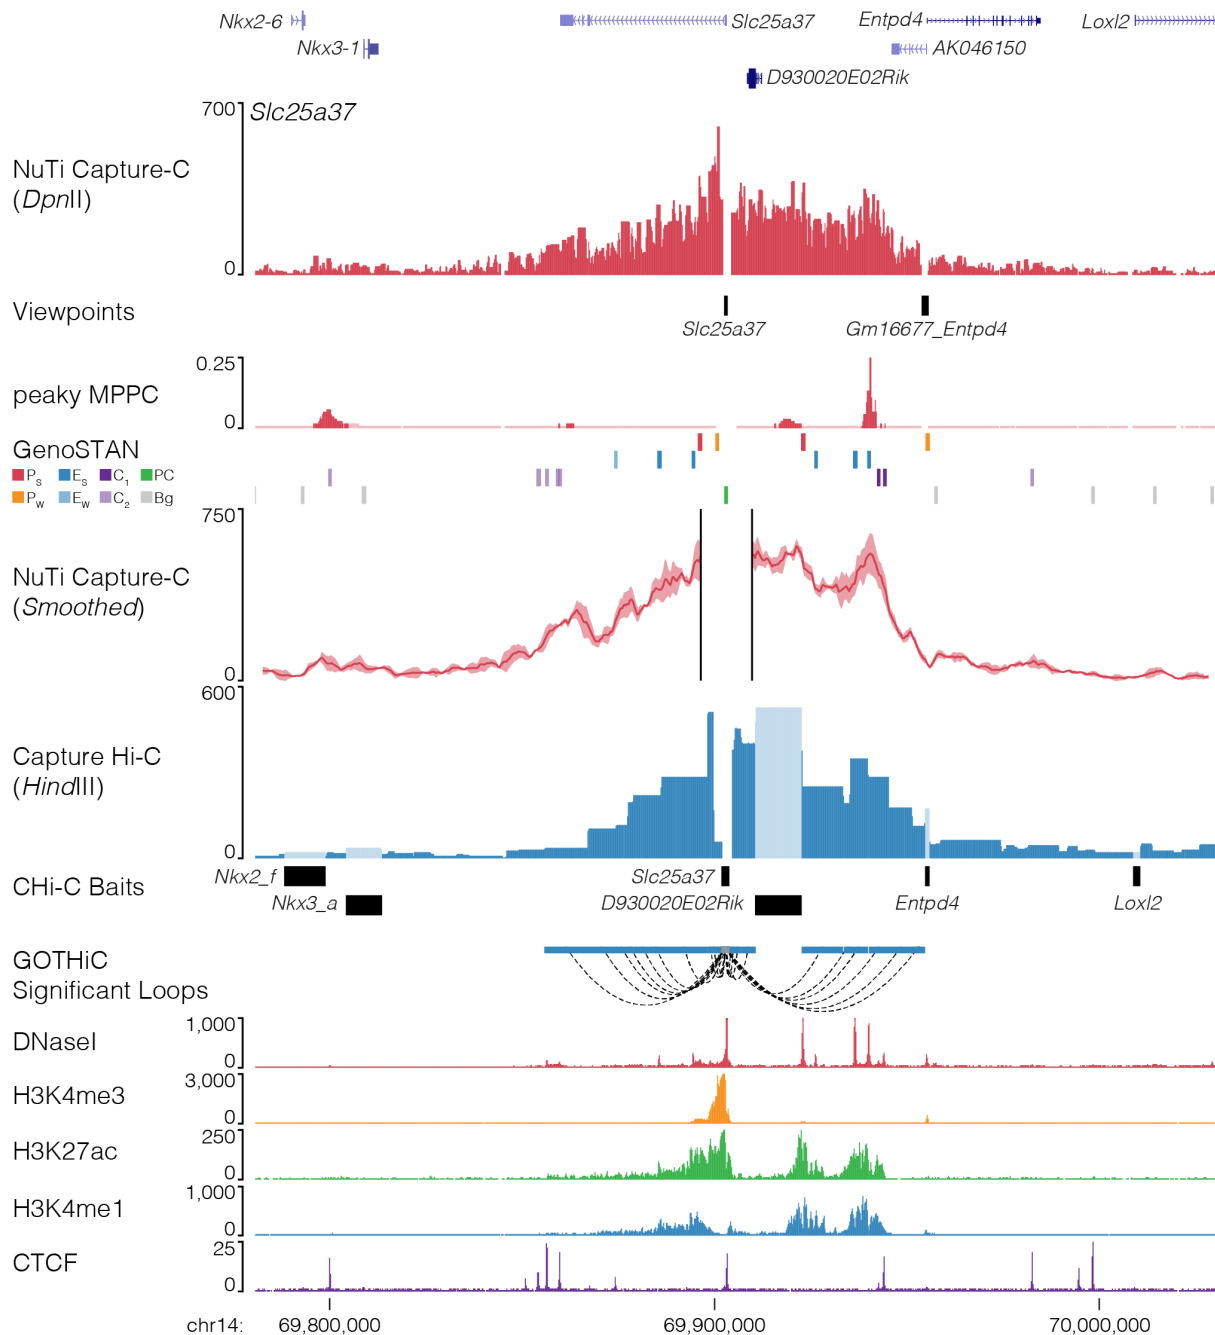

938  
939

940 **Fig. 24 | NuTi Capture-C from the *Slc25a37* promoter.** Sequence tracks showing the  
941 difference between high-resolution 3C (*DpnII*, NuTi Capture-C) and low-resolution 3C (*HindIII*,  
942 Capture Hi-C) at calling interacting fragments (mm9, chr14:69,780,624-70,030,623) in  
943 erythroid cells. Tracks in order: UCSC gene annotation, *cis*-normalized mean interactions per  
944 *DpnII* fragment using NuTi Capture-C (n=3), NuTi Capture-C viewpoints, peaky Marginal  
945 Posterior Probability of Contact (MPPC) scores with fragments with MPPC  $\geq 0.01$  darker,  
946 GenoSTAN open chromatin classification, windowed mean interactions using NuTi Capture-  
947 C, total supporting reads per *HindIII* fragment with CHi-C (n=2; co-targeted fragments are  
948 lighter in colour), CHi-C bait fragments, loops between reported significantly interacting  
949 fragments (co-targeting loops are coloured grey), erythroid tracks for open chromatin  
950 (DNaseI), promoters (H3K4me3), active transcription (H3K27ac), enhancers (H3K4me1), and  
951 boundaries (CTCF). Note overlapping MPPC signals appear darker in colour.



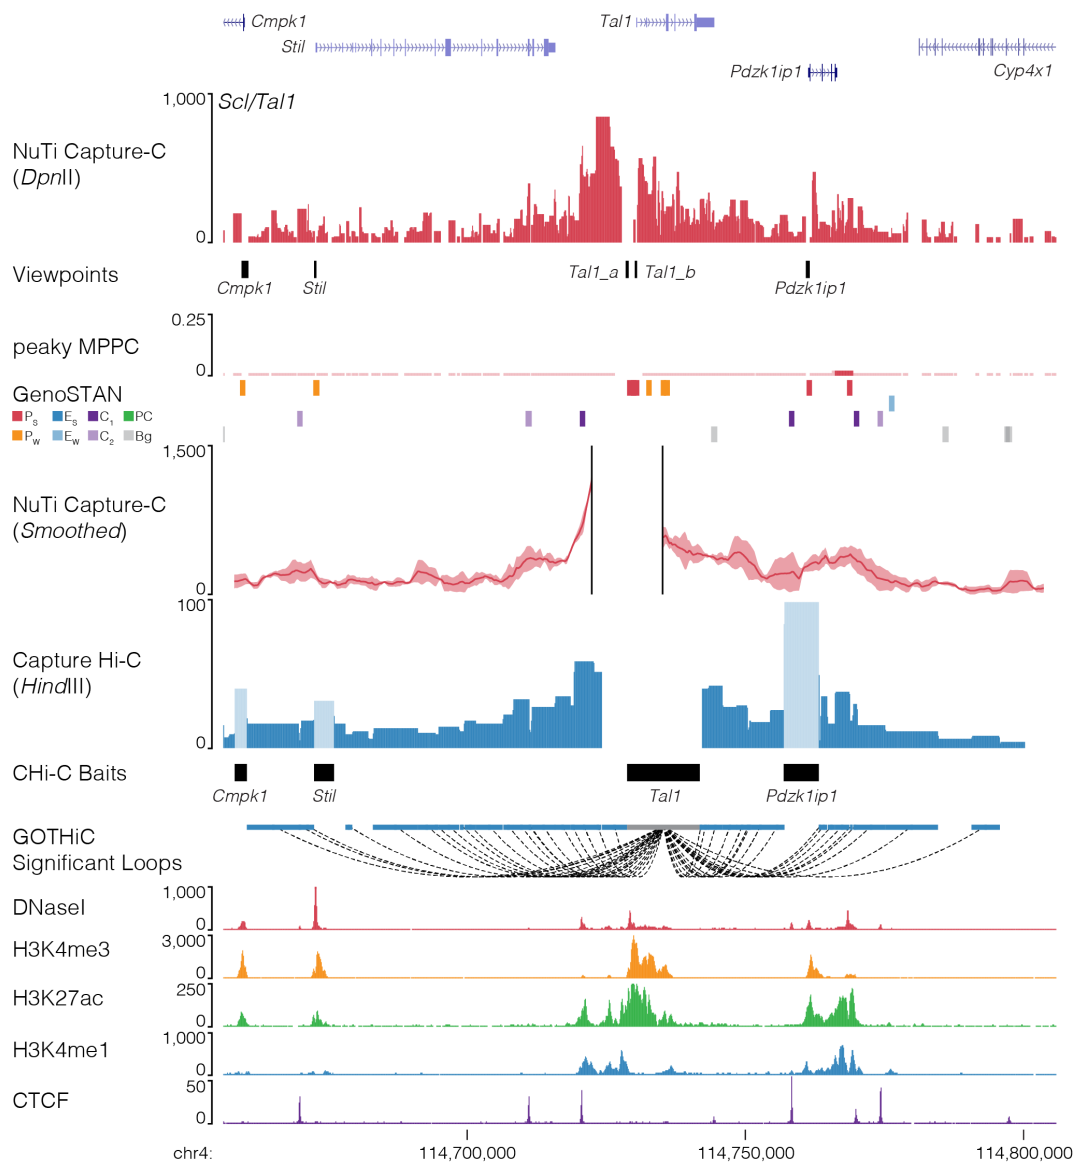

952  
953

954 **Fig. 25 | NuTi Capture-C from the *Tal1* promoter.** Sequence tracks showing the difference  
 955 between high-resolution 3C (*DpnII*, NuTi Capture-C) and low-resolution 3C (*HindIII*, Capture  
 956 Hi-C) at calling interacting fragments (mm9, chr4:114,656,021-114,806,020) in erythroid cells.  
 957 Tracks in order: UCSC gene annotation, *cis*-normalized mean interactions per *DpnII* fragment  
 958 using NuTi Capture-C (n=3), NuTi Capture-C viewpoints, peaky Marginal Posterior Probability  
 959 of Contact (MPPC) scores with fragments with MPPC  $\geq 0.01$  darker, GenoSTAN open  
 960 chromatin classification, windowed mean interactions using NuTi Capture-C, total supporting  
 961 reads per *HindIII* fragment with CHi-C (n=2; co-targeted fragments are lighter in colour), CHi-  
 962 C bait fragments, loops between reported significantly interacting fragments (co-targeting  
 963 loops are coloured grey), erythroid tracks for open chromatin (DNaseI), promoters  
 964 (H3K4me3), active transcription (H3K27ac), enhancers (H3K4me1), and boundaries (CTCF).  
 965 Note overlapping MPPC signals appear darker in colour.

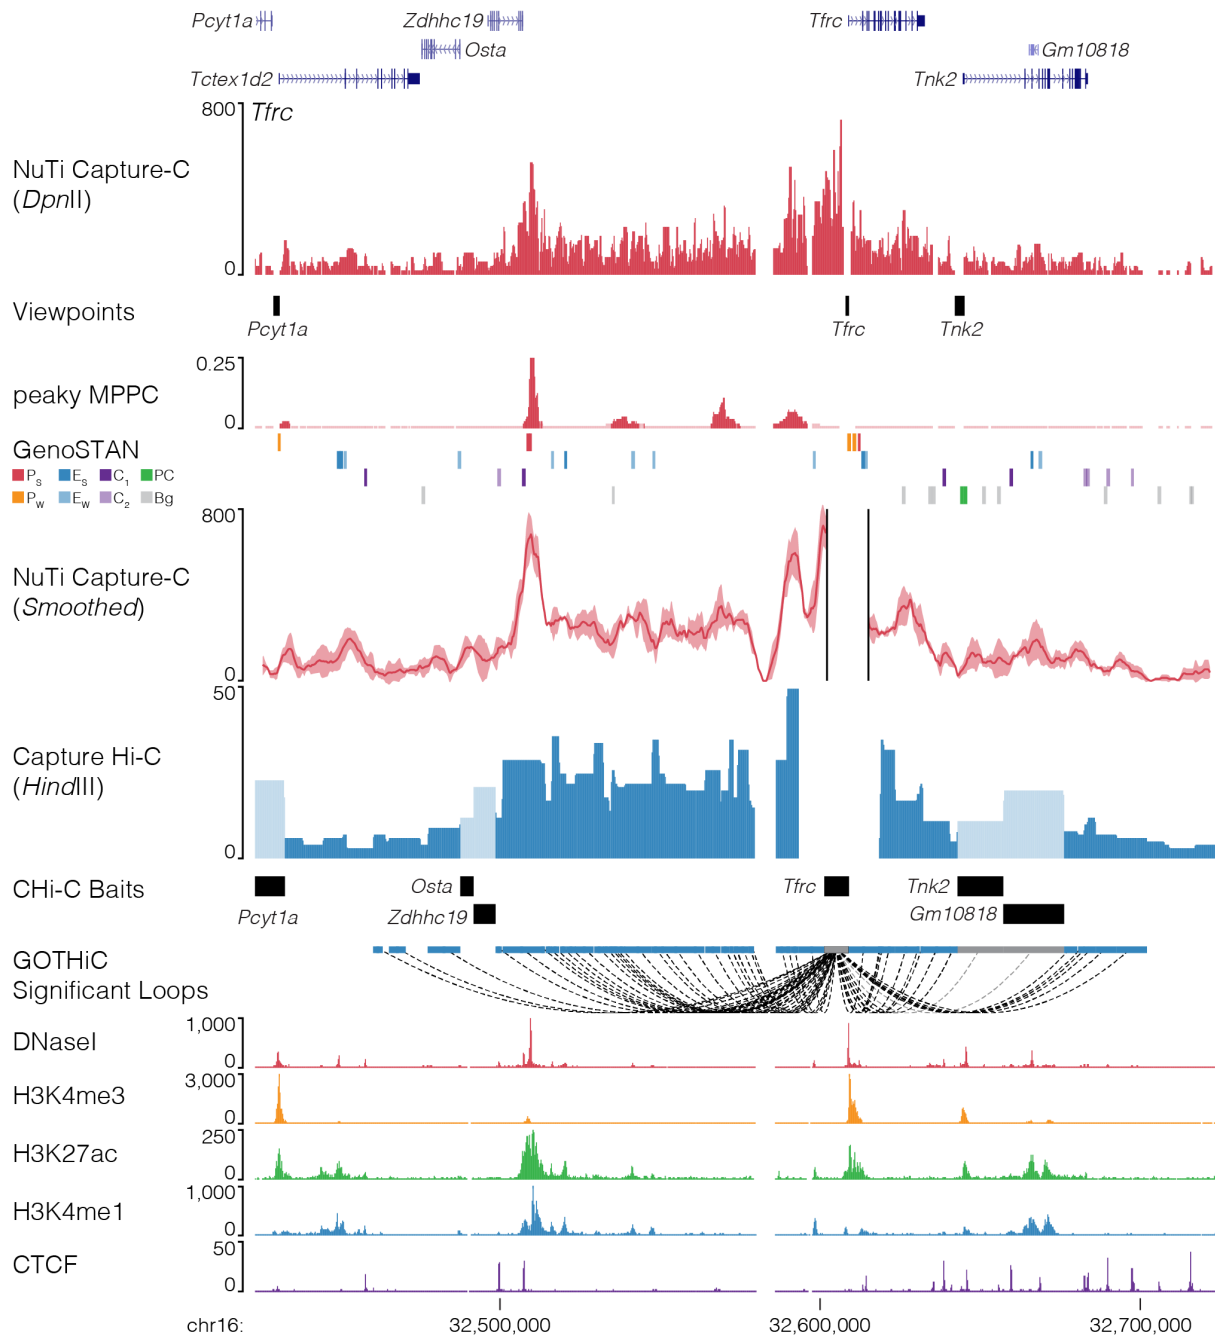

966  
967

968 **Fig. 26 | NuTi Capture-C from the *TfrC* promoter.** Sequence tracks showing the difference  
 969 between high-resolution 3C (*DpnII*, NuTi Capture-C) and low-resolution 3C (*HindIII*, Capture  
 970 Hi-C) at calling interacting fragments (mm9, chr16:32,423,792-32,723,792) in erythroid cells.  
 971 Tracks in order: UCSC gene annotation, *cis*-normalized mean interactions per *DpnII* fragment  
 972 using NuTi Capture-C (n=3), NuTi Capture-C viewpoints, peaky Marginal Posterior Probability  
 973 of Contact (MPPC) scores with fragments with MPPC  $\geq 0.01$  darker, GenoSTAN open  
 974 chromatin classification, windowed mean interactions using NuTi Capture-C, total supporting  
 975 reads per *HindIII* fragment with CHi-C (n=2; co-targeted fragments are lighter in colour), CHi-  
 976 C bait fragments, loops between reported significantly interacting fragments (co-targeting  
 977 loops are coloured grey), erythroid tracks for open chromatin (DNaseI), promoters  
 978 (H3K4me3), active transcription (H3K27ac), enhancers (H3K4me1), and boundaries (CTCF).  
 979 Note overlapping MPPC signals appear darker in colour.

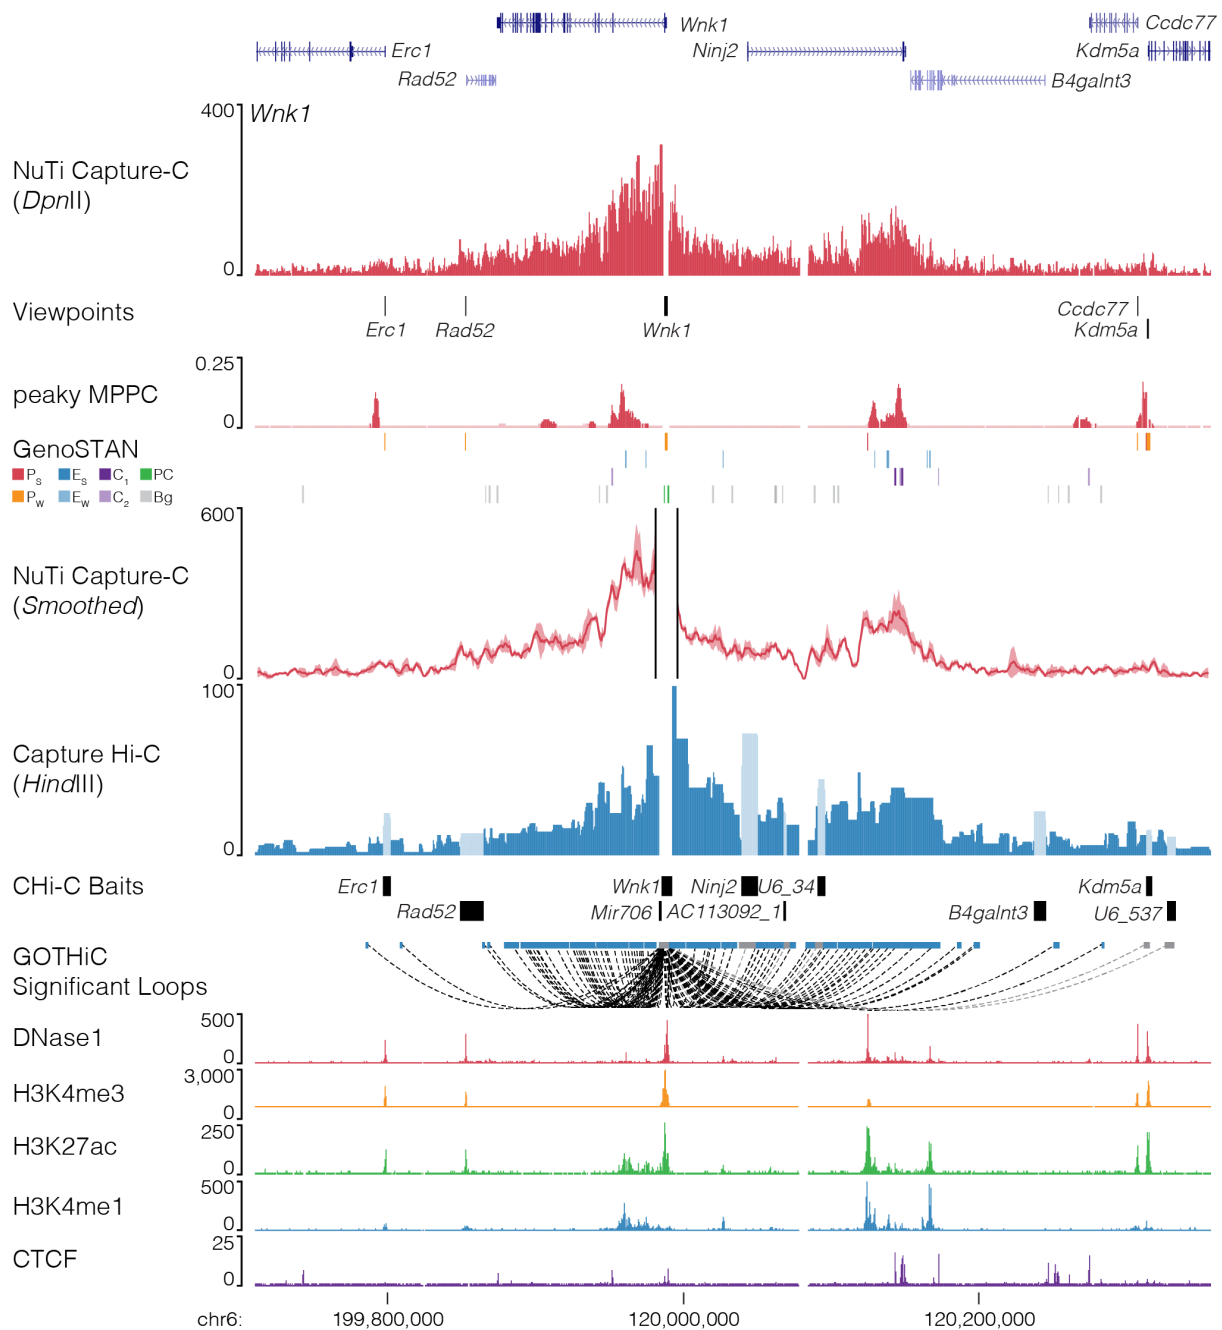

980  
981

982 **Fig. 27 | NuTi Capture-C from the *Wnk1* promoter.** Sequence tracks showing the difference  
983 between high-resolution 3C (*DpnII*, NuTi Capture-C) and low-resolution 3C (*HindIII*, Capture  
984 Hi-C) at calling interacting fragments (mm9, chr6:119,710,118-120,356,868) in erythroid cells.  
985 Tracks in order: UCSC gene annotation, *cis*-normalized mean interactions per *DpnII* fragment  
986 using NuTi Capture-C (n=3), NuTi Capture-C viewpoints, peaky Marginal Posterior Probability  
987 of Contact (MPPC) scores with fragments with MPPC  $\geq 0.01$  darker, GenoSTAN open  
988 chromatin classification, windowed mean interactions using NuTi Capture-C, total supporting  
989 reads per *HindIII* fragment with CHI-C (n=2; co-targeted fragments are lighter in colour), CHI-  
990 C bait fragments, loops between reported significantly interacting fragments (co-targeting  
991 loops are coloured grey), erythroid tracks for open chromatin (DNase1), promoters  
992 (H3K4me3), active transcription (H3K27ac), enhancers (H3K4me1), and boundaries (CTCF).  
993 Note overlapping MPPC signals appear darker in colour.

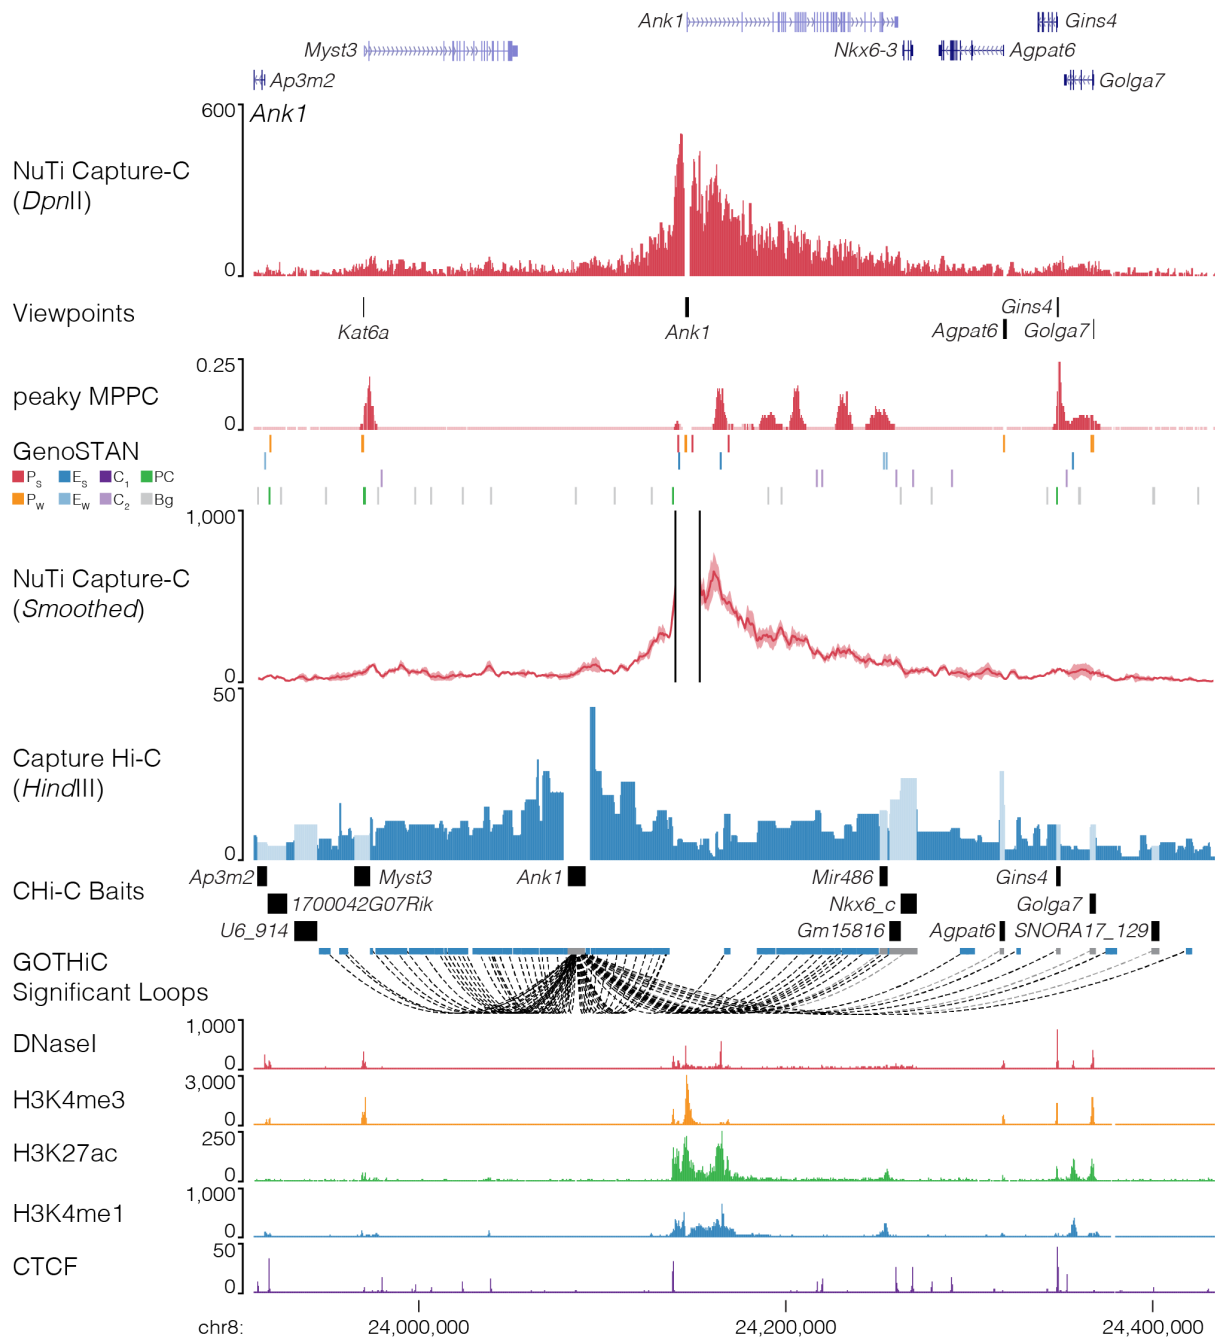

994  
995

996 **Fig. 28 | NuTi Capture-C from the *Ank1* promoter.** Sequence tracks showing the importance  
997 of tissue specific probe design when performing promoter capture with either high-resolution  
998 3C (*DpnII*, NuTi Capture-C) or low-resolution 3C (*HindIII*, Capture Hi-C), particularly for genes  
999 with multiple promoters (mm9, chr8:23,910,000-24,435,000) in erythroid cells. Tracks in order:  
1000 UCSC gene annotation, *cis*-normalized mean interactions per *DpnII* fragment using NuTi  
1001 Capture-C (n=3), NuTi Capture-C viewpoints, peaky Marginal Posterior Probability of Contact  
1002 (MPPC) scores with fragments with MPPC  $\geq 0.01$  darker, GenoSTAN open chromatin  
1003 classification, windowed mean interactions using NuTi Capture-C, total supporting reads per  
1004 *HindIII* fragment with CHi-C (n=2; co-targeted fragments are lighter in colour), CHi-C bait  
1005 bait fragments, loops between reported significantly interacting fragments (co-targeting loops are  
1006 coloured grey), erythroid tracks for open chromatin (DNaseI), promoters (H3K4me3), active  
1007 transcription (H3K27ac), enhancers (H3K4me1), and boundaries (CTCF). Note overlapping  
1008 MPPC signals appear darker in colour.

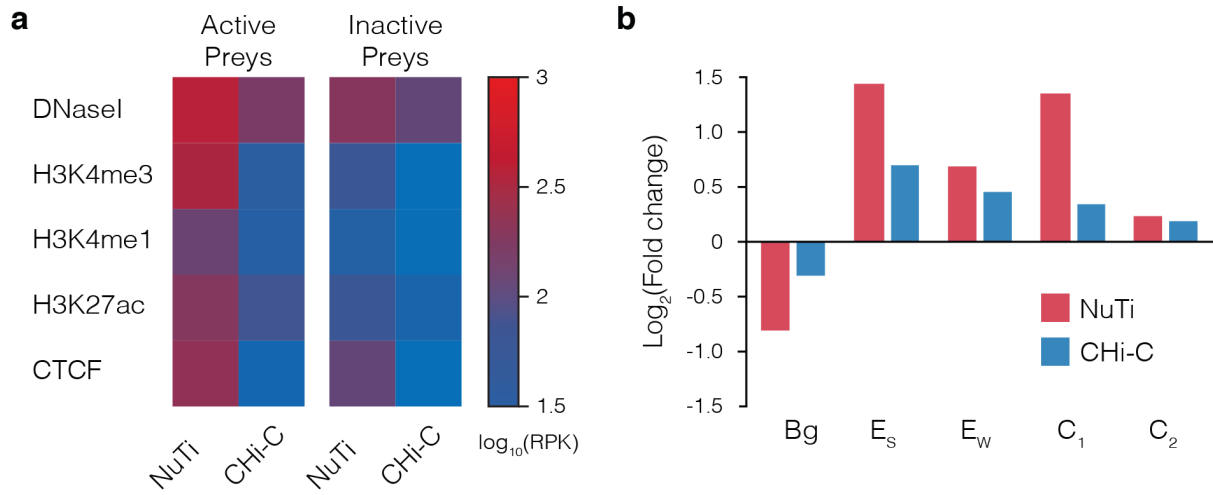

1009

1010

1011

1012

1013

1014

1015

1016

1017

**Supp. Fig. 29 | Comparison of interactions identified by NuTi Capture-C and Capture Hi-C. a,** Average chromatin signature in mouse erythroid cells over fragments identified as being significantly interacting with either active or inactive promoters by NuTi Capture-C (Nu-3C) and Capture Hi-C (CHi-C). **b,** Enrichment of different classes of open chromatin element in fragments identified as being significantly interacting with active promoters. E<sub>s</sub>: Enhancer (Strong H3K27ac), E<sub>w</sub>: Enhancer (Weak H3K27ac), C<sub>1</sub>: CTCF near promoter/enhancer, C<sub>2</sub>: CTCF, Bg: Background, RPK: Reads per kilobase.

1018 **SUPPLEMENTARY NOTE: Mathematical modelling of 3C enrichment bias.**

1019 The number of interactions in 3C experiments are constrained by the fact each fragment can  
 1020 only ligate to two other fragments. Therefore, the total number of interactions is limited by the  
 1021 total number of cells, in effect, it is a closed system. To explore the effects of enrichment for  
 1022 multiple targets on 3C libraries we created a small closed system of fragments where each  
 1023 fragment has 5,000 interactions. Within this system, interactions involving three fragments,  
 1024 “A”, “B”, and “C”, can be sampled (i.e. enriched) with varying levels of efficiency. The remaining  
 1025 fragments can be collectively considered “X”, with “D” being one of these remaining fragments.  
 1026 The absolute number of interactions between each fragment within this system and example  
 1027 interaction profiles are demonstrated below (Supp. Note Table 1, Supp. Note Fig. 1). To  
 1028 demonstrate the effect on interaction calling, within this system “significant interactions” are  
 1029 simply those observed at a frequency of greater than 1 in 50 (>0.02). The significant  
 1030 interactions in this system are A-B, A-D, and B-D.

1031

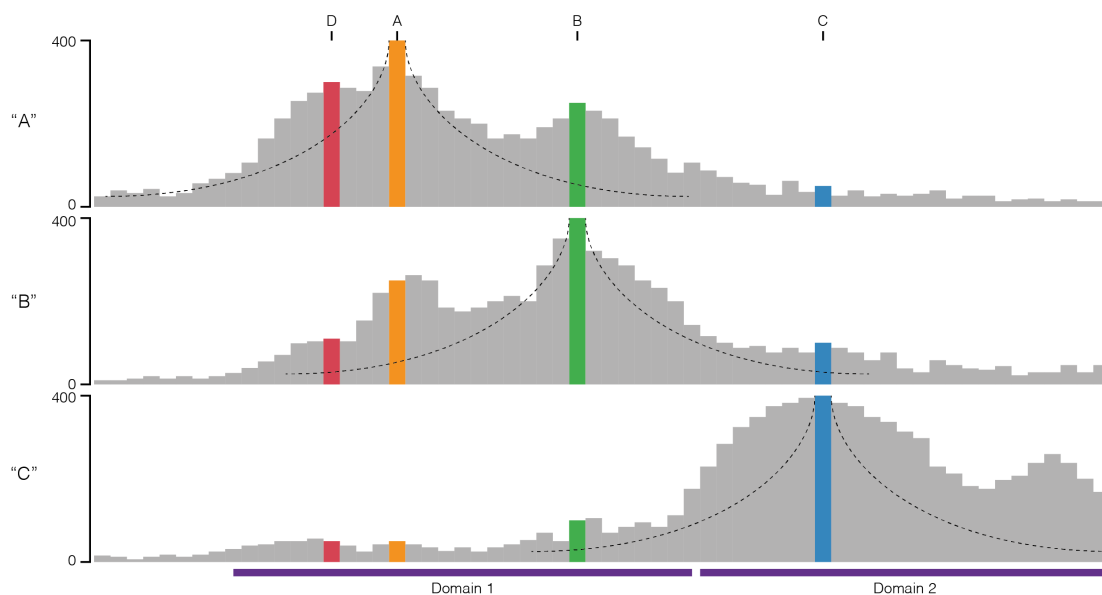

1032

1033 **Supp. Note Fig. 1 | A closed system of interactions.** Profile of absolute interaction counts  
 1034 for three sampleable fragments “A”, “B” and “C” within a closed system. The fragments  
 1035 separate into two interacting domains. Monotonic decay curves associated with the polymer  
 1036 models of interaction are shown.

1037

1038

**Supp. Note Table 1. A closed system of interactions.**

|                                   |                | Interacting Fragment / Prey |     |     |     |                |        |        |        |
|-----------------------------------|----------------|-----------------------------|-----|-----|-----|----------------|--------|--------|--------|
|                                   |                | Real Count                  |     |     |     | Real Frequency |        |        |        |
|                                   |                | “A”                         | “B” | “C” | “D” | “A”            | “B”    | “C”    | “D”    |
| Viewpoint / Bait<br>(Total count) | “A”<br>(5,000) | -                           | 250 | 50  | 300 | -              | 0.0500 | 0.0100 | 0.0600 |
|                                   | “B”<br>(5,000) | 250                         | -   | 100 | 110 | 0.0500         | -      | 0.0200 | 0.0220 |
|                                   | “C”<br>(5,000) | 50                          | 100 | -   | 50  | 0.0100         | 0.0200 | -      | 0.0100 |

1039

\*Significant interactions (Freq. > 0.02) are shaded green.

1040 The sampling within this system represents the targeted enrichment of 3C methods (e.g. probe  
 1041 hybridisation or immunoprecipitation). For 3C enrichment, efficiency can be affected by,  
 1042 among other things, the number of individual probes targeting each viewpoint and the melting  
 1043 points (e.g. Capture-C, CHi-C), and the level of target signal (e.g. Hi-ChIP, Hi-ChIRP, ChIA-  
 1044 PET). To represent this diversity in these processes, we assigned sampling of “A” and “C” to  
 1045 be highly efficient at 80% and 90% respectively. Whereas enrichment of “B” is relatively low  
 1046 at 10%. When each of these sampling efficiencies is applied to any one fragment at time, the  
 1047 total number of observed interactions decreases, however the frequency of interaction within  
 1048 the system remains constant (Note Fig. 2, Note Table 2). At this point, it is important to note  
 1049 that while the B-to-C count is lower than the C-to-B count, their proportional frequencies are  
 1050 still equal, and the same set of “significantly interacting” fragments are detected.  
 1051

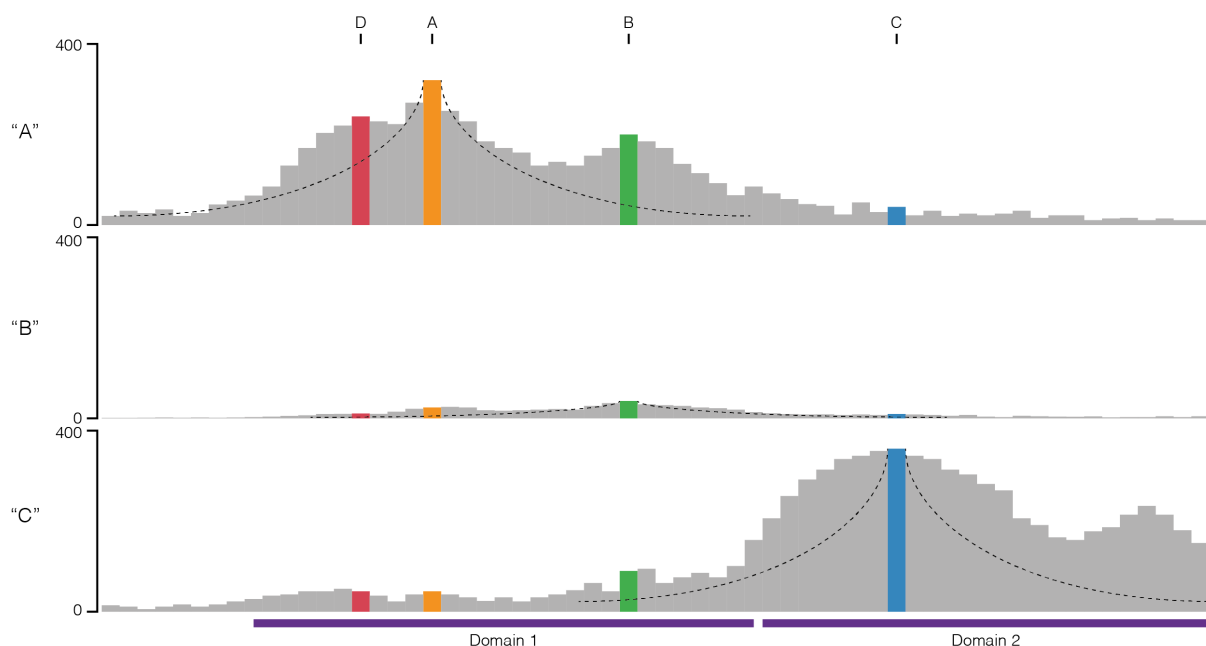

1052  
 1053 **Supp. Note Fig. 2 | Independent sampling of interactions.** Profile of observed interaction  
 1054 counts for three independently sampled fragments “A”, “B” and “C” within a closed system.  
 1055

1056 **Supp. Note Table 2.** Interaction counts following independent sampling.

|                                   |                | Interacting Fragment (Prey) |     |     |     |                    |        |        |        |                             |     |     |     |
|-----------------------------------|----------------|-----------------------------|-----|-----|-----|--------------------|--------|--------|--------|-----------------------------|-----|-----|-----|
|                                   |                | Observed Count              |     |     |     | Observed Frequency |        |        |        | Observed Freq. / Real Freq. |     |     |     |
|                                   |                | “A”                         | “B” | “C” | “D” | “A”                | “B”    | “C”    | “D”    | “A”                         | “B” | “C” | “D” |
| Viewpoint / Bait<br>(Total count) | “A”<br>(4,000) | –                           | 200 | 40  | 240 | –                  | 0.0500 | 0.0100 | 0.0600 | –                           | 1   | 1   | 1   |
|                                   | “B”<br>(500)   | 25                          | –   | 10  | 11  | 0.0500             | –      | 0.0200 | 0.0220 | 1                           | –   | 1   | 1   |
|                                   | “C”<br>(4,500) | 45                          | 90  | –   | 45  | 0.0100             | 0.0200 | –      | 0.0100 | 1                           | 1   | –   | 1   |

\*Significant interactions (Freq. > 0.02) are shaded green.

1057  
 1058

1059 When we consider sampling fragment “A”, at 80% efficiency, we fail to see 50 “A-B”  
 1060 interactions, ten “A-C” interactions, and 60 “A-D” interactions. If we were to simultaneously  
 1061 sample (co-sample) the remaining viewpoints, from the missed interactions would can recover  
 1062 five “A-B” interactions (at 10% “B” sampling efficiency), nine “A-C” interactions (at 90% “B”  
 1063 sampling efficiency), and zero “A-D” interactions as it is unsampled. This recovery can be  
 1064 applied to each fragment as the first or second fragment sampled and leads to as much as a  
 1065 9.1-fold increase in observed interaction counts. When the co-sampled fragments are  
 1066 presented as frequency values significant divergence from the true values within the system  
 1067 is observed (Supp. Note Fig. 3, Supp. Note Table 3). This divergence in frequency varies  
 1068 across each interacting pair and ranges from a 0.65-fold decrease (B-D) to a near 6-fold  
 1069 increase (B-C).  
 1070

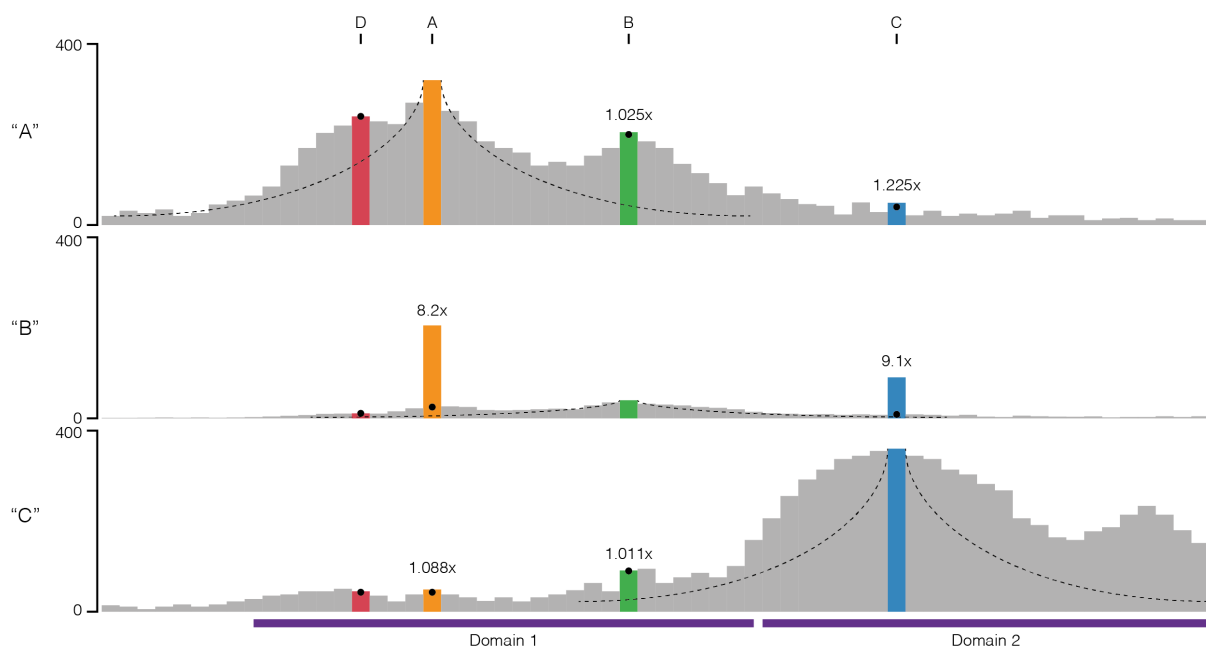

1071  
 1072 **Supp. Note Fig. 3 | Co-sampling of interactions.** Profile of observed interaction counts for  
 1073 three co-sampled fragments “A”, “B” and “C” within a closed system. Black circles represent  
 1074 counts observed with independent sampling, and the observed fold difference in raw counts  
 1075 is shown.  
 1076

1077 **Note Table 3.** Interaction counts following co-sampling.

|                                   |                | Interacting Fragment (Prey) |     |     |     |                    |               |               |               |                             |       |              |              |
|-----------------------------------|----------------|-----------------------------|-----|-----|-----|--------------------|---------------|---------------|---------------|-----------------------------|-------|--------------|--------------|
|                                   |                | Observed Count              |     |     |     | Observed Frequency |               |               |               | Observed Freq. / Real Freq. |       |              |              |
|                                   |                | “A”                         | “B” | “C” | “D” | “A”                | “B”           | “C”           | “D”           | “A”                         | “B”   | “C”          | “D”          |
| Viewpoint / Bait<br>(Total count) | “A”<br>(4,014) | –                           | 205 | 49  | 240 | –                  | <b>0.0511</b> | 0.0122        | <b>0.0598</b> | –                           | 1.021 | 1.221        | 0.997        |
|                                   | “B”<br>(761)   | 205                         | –   | 91  | 11  | <b>0.2694</b>      | –             | <b>0.1196</b> | 0.0145        | 5.387                       | –     | <b>5.978</b> | <b>0.657</b> |
|                                   | “C”<br>(4,505) | 49                          | 91  | –   | 45  | 0.0109             | <b>0.0202</b> | –             | 0.0100        | 1.087                       | 1.009 | –            | 0.998        |

1078 \*Significant interactions (Freq. > 0.02) are shaded green.



1079

1080 Interestingly, where previously the frequency of B-to-C matched C-to-B, it is now the count of  
 1081 interactions which is equal, and the observed frequency is unequal. This change in frequency  
 1082 also results in different significant interactions, B-D is no longer called (false negative), while  
 1083 B-C is now called (false positive). The effect on relative frequency of co-sampling is bi-  
 1084 directional: the observed frequency of interaction with co-sampled fragments increases, and  
 1085 the observed frequency of interaction with un-sampled fragments decreases. Therefore,  
 1086 significant and variable bias is introduced by co-targeting.

1087

1088 To determine the effect of this divergence we formalized this bias into a polynomial equation  
 1089 (Supp. Note Fig. 4) describing the observed interaction frequency of two co-targeted  
 1090 fragments ( $O_{AB}$ ) within all interactions containing "A". For the numerator, the efficiency of  
 1091 targeting "A" ( $E_A$ ) and the real frequency of "A-B" ( $f_{AB}$ ) determines the number of interactions  
 1092 sampled by the A probe and the number of "lost interactions" available for the B probe ( $1 - E_A$ ).  
 1093 These lost interactions are then recovered at the efficiency of the B probe ( $E_B$ ). The  
 1094 denominator, which describes the total observations involving A, can be simply denoted as  $E_A$   
 1095 plus the number of recovered events ( $E_B \times f_{AB} \times [1 - E_A]$ ). The level of bias can then be  
 1096 calculated as  $O_{AB}$  divided by  $f_{AB}$ .

1097

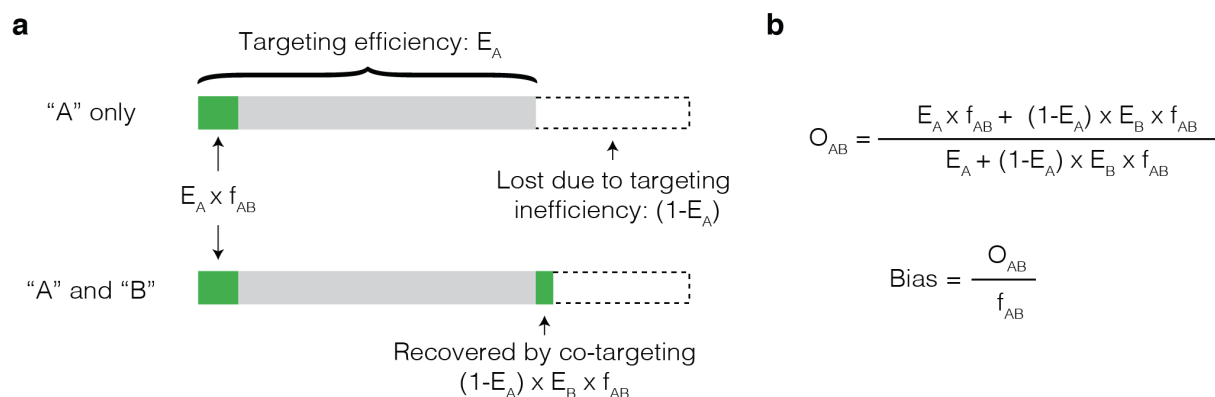

1098

1099 **Supp. Note Fig. 4 | Model for the effect on observed frequency caused by co-targeting.**  
 1100 **a**, Diagram of the total number of interactions containing A (entire bar), which includes A-B  
 1101 (green) and the effect of incompletely efficient targeting. Un-enriched (or lost) interactions are  
 1102 in dotted lines, but can be recovered by capture with additional probes. **b**, Equations for the  
 1103 observed frequency of A-B interaction ( $O_{AB}$ ) when both A and B are samples and calculation  
 1104 of bias.

1105

1106 We used this equation to model the effects of variable efficiency of enrichment (0.05-1.0), and  
 1107 variable underlying interaction frequencies (1/200,000, 1/25,000 and 1/40; based on the min,  
 1108 median, and max interactions frequencies associated with *Hba-1* capture). Under these tested  
 1109 parameters the highest level of bias was a ~20-fold increase in frequency (Supp. Note Fig. 5),

1110 seen when the primary target had a low enrichment efficiency, and the secondary target had  
1111 a high enrichment efficiency. Notably, for any given level of enrichment efficiency the level of  
1112 bias was variable across the interaction frequencies, with infrequent interactions more affected  
1113 than frequent interactions.  
1114

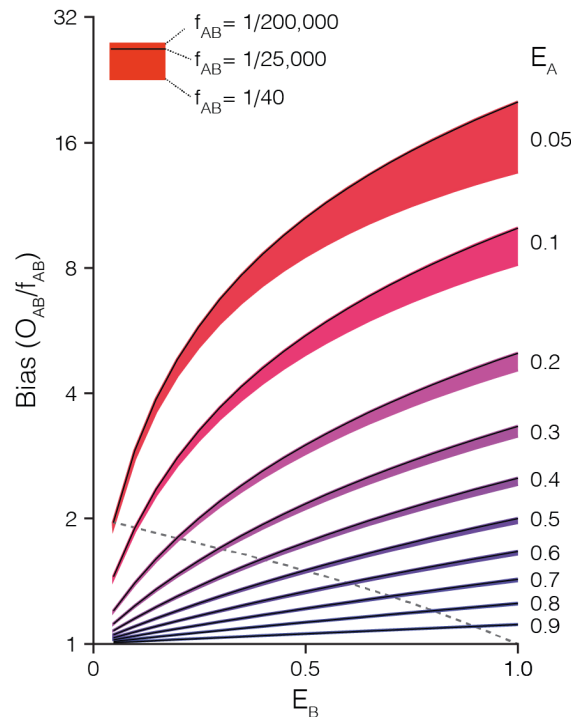

1115  
1116 **Supp. Note Fig. 5 | Levels of observed frequency bias caused by co-targeting.** Variable  
1117 levels of bias are observed in the observed frequency of A-B interaction ( $O_{AB}$ ) when altering  
1118 the efficiency of targeting fragment A ( $E_A$ ), targeting fragment B ( $E_B$ ), and the real frequency  
1119 of A-B interaction ( $f_{AB}$ ). The Dashed line shows when efficiency of targeting A and B is equal  
1120 ( $E_A = E_B$ ). Note that bias is avoided only when  $E_A$  is equal to either zero or one.  
1121  
1122

1123 The implication of these results are quite striking and two-fold. Firstly, when investigating a  
1124 viewpoint with very low enrichment (say ChIA-PET for a poorly bound PolII site, or Hi-ChIP at  
1125 a weak H3K27ac peak) then significant enrichment bias is likely to be seen at strong PolII or  
1126 H3K27ac sites, regardless of whether or not they are actually interacting. In fact, the rarer an  
1127 interaction is, the stronger the bias effect. Secondly, because all three parameters (enrichment  
1128 at targets, and the underlying interaction frequency) contribute significantly to the observed  
1129 bias, proper data correction depends upon having accurate values for all three parameters.
